# Supplementary material for: An online optimization strategy for a fluid catalytic cracking process using a case-based reasoning method based on big data technology
Source: Royal Society of Chemistry journal article supplement (doi:10.1039/d1ra03228c), 2021-01-01
Supplement: d1ra03228c1.pdf [file d1ra03228c1.pdf]

## Appendix A The input variables for modeling

Table S1. DCS tag number selected for modeling

| #  | DCS tag number | Location/remark                                               |
|----|----------------|---------------------------------------------------------------|
| 1  | TI3106B        | Top of quench nozzle                                          |
| 2  | TI3106A        | Bottom of quench nozzle                                       |
| 3  | TI3111         | Part of 'Y' form                                              |
| 4  | FIC3105        | Atomizing steam flow rate of return refining slurry           |
| 5  | FIC3208        | Residuum oil flow rate                                        |
| 6  | FIC3209        | Wax oil flow rate                                             |
| 7  | FIC3109        | Bottom flow of fluidized steam                                |
| 8  | PdI3122        | Riser pressure drop                                           |
| 9  | PdIC3103       | Pressure drop of regenerative slide valve                     |
| 10 | DI3102         | Density in the riser                                          |
| 11 | TIC3101        | Riser outlet temperature                                      |
| 12 | TIC3204        | Preheating temperature of feed oil                            |
| 13 | FIC3111        | Pre-lift steam flow                                           |
| 14 | FIC3110        | Pre-lift dry gas flow                                         |
| 15 | PI3106         | Pressure in the top of settler                                |
| 16 | TIC3125        | The first stage of the two-stages regenerator                 |
| 17 | TI3126A        | The bottom of first stage in the two-stages regenerator       |
| 18 | TIC3102        | Temperature in the second stage of the two-stages regenerator |
| 19 | PI3110         | Pressure in the second stage of the two-stages regenerator    |
| 20 | DI3112         | Density in the second stage of the two-stages regenerator     |
| 21 | FIC3122        | Main air flow rate                                            |
| 22 | TI3131A        | The bottom of second stage in the two-stages regenerator      |

Table S2. LIMS properties selected for modeling

| # | Analysis item          | Unit |
|---|------------------------|------|
| 1 | 10% Distillation point | °C   |

---

|   |                        |                   |
|---|------------------------|-------------------|
| 2 | 30% Distillation point | °C                |
| 3 | 5% Distillation point  | °C                |
| 4 | 50% Distillation point | °C                |
| 5 | 70% Distillation point | °C                |
| 6 | Carbon residue content | wt.%              |
| 7 | Initial boiling point  | °C                |
| 8 | Density                | kg/m <sup>3</sup> |
| 9 | Sulphur content        | wt.%              |

---
