# Supplementary material for: An online optimization strategy for a fluid catalytic cracking process using a case-based reasoning method based on big data technology
Source: Royal Society of Chemistry journal article supplement (doi:10.1039/d1ra03228c), 2021-01-01
Supplement: d1ra03228c2.csv [file d1ra03228c2.csv]

10%	30%	5%	50%	70%	Carbon residue content	initialpoint	density	Sulphur content	TI3106B	TI3106A	TI3111	FIC3105	FIC3208	FIC3209	FIC3109	PdI3122	PdIC3103	DI3102	TIC3101	TIC3204	FIC3111	FIC3110	PI3106	TIC3125	TI3126A	TIC3102	PI3110	DI3112	FIC3122	TI3131A	LPG yield	Diesel yield	Drygas yield	Gasoline yield
356.2054184	404.4512828	322.2267611	437.7442022	499.3856953	2.880089467	222.8058123	912.6490438	0.294189989	513.0306927	516.4209904	667.1822158	1.512039426	138.7138175	252.3493729	2.256000517	70.99987722	52.07158314	59.61035276	501.2401897	220.1678884	6.62148144	4.148095676	0.225650838	698.669029	707.5047937	699.11177	0.302897195	421.4417091	2509.824923	657.6994236	16.63191557	20.37561123	3.920432032	51.85345773
356.2045664	404.449099	322.2227036	437.7424742	499.3826651	2.879255524	222.8004565	912.6500191	0.29416532	513.0402499	516.4067497	667.1637921	1.512478881	138.7695874	252.4391363	2.256000596	70.98209009	52.13113122	59.58664236	501.2480733	220.1677114	6.622553487	4.147986349	0.225617269	698.6251905	707.4711725	699.0776655	0.302922113	421.2673928	2509.972521	657.6747307	16.62599785	20.02028575	3.984602404	52.34656584
356.2037037	404.4469136	322.218638	437.7407407	499.3796296	2.878431373	222.7950938	912.6509972	0.294140673	513.0404089	516.4105621	667.1801922	1.512081421	138.7440558	252.4522543	2.256000664	71.0153913	52.13818376	59.60568639	501.2414604	220.1685642	6.621958912	4.147993337	0.2256208	698.6448074	707.4240519	699.0700168	0.302917705	421.466957	2510.222519	657.6907757	16.62679495	19.76573937	4.137001958	52.22642351
356.2028303	404.4447266	322.2145644	437.739002	499.3765888	2.877616992	222.7897242	912.6519778	0.29411605	513.0257217	516.441511	667.247168	1.510457685	138.5958494	252.3437127	2.256000715	71.12216416	52.06262343	59.68897474	501.2139746	220.1710929	6.618914537	4.14818081	0.225680293	698.7609365	707.3721862	699.1106577	0.302869258	422.216039	2510.572391	657.7665244	16.63798423	19.54408445	3.974352744	51.61633807
356.2019462	404.4425379	322.2104827	437.7372578	499.3735425	2.876812363	222.7843477	912.6529612	0.294091449	512.9956464	516.5011247	667.365477	1.507609754	138.3213717	252.1024502	2.256000734	71.30374902	51.8972695	59.84053173	501.1654231	220.1750504	6.613335509	4.14855698	0.225800681	698.9813864	707.323583	699.2006717	0.302774841	423.5411305	2510.958634	657.9040325	16.66023264	19.79112483	4.073276349	51.74832174
356.2010513	404.4403477	322.2063931	437.7355083	499.370491	2.876017465	222.7789644	912.6539472	0.29406687	512.9588104	516.5787711	667.5169783	1.504102207	137.9869687	251.8112354	2.256000695	71.54040673	51.6773576	60.02497086	501.1057112	220.1781252	6.606342331	4.14902598	0.225962634	699.2551916	707.2418978	699.2906764	0.30265614	425.0473467	2511.55802	658.0842166	16.68724244	19.56402838	4.11464245	51.64489703
356.2001458	404.4381559	322.2022955	437.7337535	499.3674341	2.87523228	222.7735742	912.6549359	0.294042315	512.9185812	516.6700279	667.6897957	1.500276731	137.6207255	251.485834	2.25600057	71.81618872	51.41228227	60.23199045	501.0402232	220.179218	6.598443991	4.149551358	0.22616073	699.5702603	707.1387421	699.3657993	0.302521852	426.6241891	2512.244091	658.2954538	16.71717531	19.7645455	3.999958276	51.83060914
356.1992295	404.4359625	322.1981899	437.7319933	499.3643718	2.874456787	222.7681772	912.6559273	0.294017782	512.8781661	516.7694969	667.8662634	1.496588673	137.2510702	251.1217027	2.256000326	72.10387821	51.10989257	60.4557831	500.9755371	220.1774187	6.590218364	4.150098029	0.226389303	699.922667	707.0559075	699.4197594	0.302380779	428.2428751	2512.659001	658.5198587	16.74903201	19.90046743	4.143298807	51.95442883
356.1983026	404.4337675	322.1940763	437.7302278	499.3613043	2.873690967	222.7627733	912.6569213	0.293993272	512.8433564	516.8701797	668.0311245	1.493508676	136.9248888	250.7640545	2.255999929	72.38559374	50.78908305	60.67458136	500.9196174	220.1708727	6.582475847	4.150602724	0.226637962	700.2835701	706.9866525	699.4215263	0.302247735	429.6488726	2512.796868	658.7425237	16.77884693	19.93722159	4.13035847	52.30137332
356.1973649	404.4315708	322.1899547	437.7284569	499.3582315	2.872934799	222.7573627	912.6579179	0.293968785	512.8169274	516.9706528	668.1814961	1.491213732	136.6654312	250.4458961	2.255999347	72.66280401	50.45331504	60.87562174	500.87608	220.1580461	6.575549755	4.151037497	0.226906463	700.6369626	706.9105738	699.3480095	0.3021293	430.6344008	2512.799242	658.9628342	16.80415532	19.97212006	4.003397386	52.94630047
356.1964165	404.4293726	322.1858253	437.7266808	499.3551533	2.872188265	222.7519452	912.6589172	0.29394432	512.8061217	517.0621666	668.2983055	1.490294877	136.531874	250.2250749	2.255998536	72.91343349	50.12599929	61.03113187	500.8550396	220.1365899	6.57046657	4.151323029	0.227181793	700.9460556	706.8190568	699.1604822	0.302044216	430.8696221	2512.668612	659.162266	16.81982528	20.00646032	4.162041764	52.87450155
356.1954575	404.4271729	322.1816879	437.7248993	499.3520699	2.871451344	222.746521	912.6599192	0.293919878	512.8221363	517.1308357	668.3541457	1.491595961	136.6140743	250.1995523	2.255997443	73.1062911	49.84789877	61.09630246	500.8711749	220.1031861	6.568781811	4.151335303	0.227441015	701.1490535	706.6857427	698.7983668	0.302021495	429.8364452	2512.505301	659.3132546	16.81763333	19.93145659	4.118216868	52.5626184
356.1944877	404.4249715	322.1775426	437.7231125	499.3489811	2.870724017	222.74109	912.6609237	0.293895459	512.8654513	517.1752337	668.3479896	1.49514381	136.9171993	250.3754168	2.25599614	73.23305107	49.62828978	61.06748067	500.9245803	220.0586463	6.570604782	4.15106878	0.227678022	701.2408821	706.5113646	698.2654394	0.302062654	427.5078159	2512.354666	659.4135264	16.79710612	19.95914312	4.277662333	52.15210553
356.1935072	404.4227685	322.1733894	437.7213204	499.3458871	2.870006265	222.7356523	912.6619309	0.293871062	512.9281759	517.2019943	668.2958861	1.500368729	137.3802458	250.6779679	2.255994827	73.29314669	49.45790044	60.97463257	501.0040454	220.0077562	6.574972693	4.150608774	0.227895019	701.2622852	706.3328559	697.6239877	0.302148195	424.3050588	2512.11132	659.4751733	16.76423892	19.93318381	4.147371331	52.27023408
356.1925161	404.420564	322.1692283	437.7195229	499.3427878	2.869298066	222.7302078	912.6629407	0.293846689	513.0036933	517.2168777	668.21514	1.506706434	137.9515346	251.0578376	2.255993711	73.29017981	49.33362864	60.83948517	501.099014	219.954919	6.581044116	4.150026585	0.228091344	701.2411455	706.1629482	696.9246609	0.302261678	420.5341448	2511.852689	659.5117182	16.72352007	19.85017691	4.072655283	51.92465374
356.1915143	404.4183579	322.1650594	437.7177202	499.3396833	2.868599403	222.7247566	912.6639532	0.293822337	513.0794395	517.2328874	668.140638	1.513074853	138.5317309	251.4243624	2.255993082	73.2448457	49.23702489	60.70436863	501.1900405	219.9069492	6.58713976	4.149459192	0.228274765	701.2325734	706.0151225	696.2513782	0.302371256	416.7384688	2511.7446	659.5535565	16.68318969	19.81679616	4.042637019	51.61437982
356.1905017	404.4161502	322.1608826	437.7159122	499.3365735	2.867910254	222.7192987	912.6649682	0.293798009	513.1490372	517.2540254	668.0869633	1.518946944	139.0717951	251.7272309	2.255993189	73.15185933	49.17259809	60.58971037	501.2668433	219.8689773	6.592514304	4.148973528	0.228438878	701.2619625	705.9105269	695.6610446	0.302461772	413.2428771	2511.827307	659.6098121	16.64747473	19.97178114	3.949077544	51.3688463
356.1894785	404.4139409	322.156698	437.7140989	499.3334585	2.867230601	222.7138341	912.6659859	0.293773703	513.2161397	517.2717123	668.0418423	1.524596637	139.6031902	251.9980322	2.255994191	72.97815696	49.17743544	60.47750119	501.3331555	219.8426992	6.59783629	4.148524711	0.228558745	701.3019352	705.8551668	695.1558132	0.302544383	409.9307732	2512.138988	659.6629642	16.61364156	20.20722095	4.019286141	51.44537801
356.1884447	404.4117301	322.1525055	437.7122803	499.3303382	2.866560424	222.7083628	912.6670062	0.29374942	513.2735128	517.2895809	668.0215068	1.529411431	140.0703674	252.1817363	2.255996405	72.71423315	49.26209044	60.38977902	501.3769715	219.8345057	6.602288141	4.148187276	0.228623121	701.3786002	705.8730573	694.8042703	0.302602329	407.1782712	2512.746011	659.7218196	16.5863426	20.08330311	4.002021651	52.10310773
356.1874001	404.4095177	322.1483053	437.7104564	499.3272127	2.865899702	222.7028848	912.6680291	0.293725159	513.3107235	517.3137488	668.0484841	1.532542811	140.392625	252.1935501	2.256000223	72.35092672	49.43369344	60.36070385	501.3817409	219.8527039	6.60466221	4.148069648	0.228621268	701.5339275	706.0024689	694.7002066	0.302611087	405.537946	2513.669512	659.7996367	16.57249701	20.06231205	4.159524767	52.19186145
356.1863449	404.4073037	322.1440972	437.7086272	499.324082	2.865248417	222.6974002	912.6690545	0.293700922	513.3273784	517.3412307	668.1232389	1.533971284	140.5688919	252.0315189	2.25600547	71.89575208	49.69548548	60.38757532	501.347976	219.8969003	6.604982937	4.148170673	0.22855042	701.7630599	706.2418329	694.846652	0.302572875	405.0219719	2514.916726	659.8954702	16.57216464	20.04535953	3.864150231	51.82335455
356.1852789	404.4050882	322.1398814	437.7067928	499.3209461	2.864606548	222.6919089	912.6700826	0.293676707	513.3257579	517.368859	668.2437951	1.533919149	140.6186798	251.7164395	2.256011458	71.39427307	50.02302518	60.45875417	501.283083	219.9604283	6.60347411	4.148461132	0.228429239	702.0524572	706.5605287	695.1958872	0.302497634	405.4271074	2516.48048	660.0135261	16.58363924	20.05523039	4.017888042	51.86777773
356.1842023	404.4028711	322.1356578	437.704953	499.3178049	2.863974076	222.6864111	912.6711132	0.293652514	513.3114115	517.3883866	668.3974826	1.532899325	140.588183	251.2912241	2.256017458	70.87926651	50.40449736	60.55051621	501.1993863	220.0356783	6.600859574	4.14887414	0.228268494	702.3718885	706.9309852	695.6858548	0.302404451	406.4326819	2518.293423	660.1466451	16.60319322	20.01082603	4.036464977	51.74327573
356.1831151	404.4006525	322.1314265	437.7031081	499.3146586	2.863350982	222.6809066	912.6721464	0.293628344	513.2982223	517.3828204	668.5510645	1.532131616	140.5901534	250.8637368	2.256022351	70.38704695	50.83208823	60.60877638	501.1231258	220.1088193	6.59894313	4.149250772	0.228080028	702.6519823	707.3028994	696.1876389	0.302334868	407.3056698	2520.231915	660.2718889	16.6215105	20.03296929	3.979039808	51.7461312
356.1820172	404.3984323	322.1271874	437.7012578	499.3115071	2.862737244	222.6753955	912.6731822	0.293604197	513.2888871	517.3465869	668.7000178	1.531897763	140.6479173	250.4554013	2.256025303	69.96764987	51.28178241	60.61935088	501.0633405	220.1722951	6.598044365	4.149553645	0.227881877	702.8749791	707.6468472	696.6498032	0.302301783	407.8396257	2522.23685	660.3904894	16.63667904	20.02174532	3.969855005	52.29311966
356.1809086	404.3962105	322.1229406	437.6994023	499.3083504	2.862132845	222.6698778	912.6742206	0.293580072	513.2750008	517.2837236	668.8657359	1.531545008	140.6965633	250.0002093	2.25602596	69.66469384	51.72953447	60.60712975	501.0107939	220.2270717	6.597097954	4.149864728	0.227686453	703.0719992	707.9668704	697.1140814	0.302289619	408.399926	2524.301762	660.5216419	16.65426047	20.04322313	4.034027489	51.91335958
356.1797893	404.3939872	322.1186861	437.6975416	499.3051885	2.861537763	222.6643535	912.6752615	0.29355597	513.258855	517.188604	669.0452768	1.531339574	140.756153	249.5157645	2.256023272	69.54516211	52.1407586	60.55883707	500.9753811	220.2638943	6.596344556	4.150148981	0.227518948	703.22668	708.2274074	697.5210225	0.302311717	408.7812069	2526.341949	660.6696438	16.67266067	19.97908955	4.073205288	51.71710078
356.1786594	404.3917623	322.1144239	437.6956756	499.3020215	2.86095198	222.6588227	912.676305	0.293531891	513.2432469	517.0558316	669.2362334	1.531603972	140.8504511	249.0240053	2.256015913	69.69731175	52.46592786	60.45942961	500.9693962	220.2706842	6.596023949	4.150365386	0.227415525	703.3215088	708.3803186	697.7914062	0.302383631	408.7147611	2528.257977	660.8425895	16.6899282	19.8076547	4.096308377	51.92862126
356.1775188	404.3895359	322.1101541	437.6938043	499.2988493	2.860375476	222.6532853	912.677351	0.293507834	513.2269973	516.8875936	669.4381777	1.532249268	140.9683619	248.5206161	2.25600396	70.12206371	52.69415615	60.31323026	500.9911862	220.2472217	6.595989074	4.150519901	0.227383315	703.3611153	708.4258483	697.9230336	0.302502262	408.2588163	2530.055944	661.0409935	16.70671697	19.70337884	4.057918523	51.55090642
356.1763676	404.387308	322.1058765	437.6919279	499.295672	2.85980823	222.6477415	912.6783996	0.2934838	513.2128745	516.6872309	669.6339476	1.533442702	141.1265259	248.0377068	2.255988556	70.73788414	52.85127855	60.11645704	501.0381867	220.1989187	6.596685167	4.150580101	0.227405819	703.3380075	708.3883266	697.9224964	0.302665918	407.3900549	2531.807668	661.2451373	16.72092912	19.57960239	3.979905655	51.58885757
356.1752057	404.3850785	322.1015913	437.6900462	499.2924895	2.859250224	222.642191	912.6794507	0.293459789	513.1977145	516.4643911	669.8213418	1.534853499	141.2937831	247.561879	2.255971001	71.47061851	52.95328411	59.88677009	501.0986871	220.1344174	6.597764586	4.150577617	0.22747072	703.2723421	708.302786	697.8362192	0.302857563	406.3660892	2533.617194	661.4480592	16.73446891	19.48901665	3.989238938	51.93368586
356.1740332	404.3828475	322.0972985	437.6881592	499.2893019	2.858701437	222.6366341	912.6805044	0.2934358	513.1721905	516.2376192	670.0086072	1.535581145	141.38742	247.0354347	2.255953606	72.19373629	53.03512522	59.66743874	501.1463387	220.0720306	6.598145636	4.150613511	0.22754954	703.2155346	708.2418146	697.7845316	0.303038643	405.8248503	2535.680272	661.6457905	16.75338704	19.5479783	3.981082316	52.34857502
356.17285	404.3806149	322.0929981	437.6862671	499.2861092	2.85816185	222.6310707	912.6815606	0.293411834	513.1364521	516.0158581	670.1839622	1.535570962	141.4006748	246.4721522	2.255937696	72.82671104	53.10908512	59.46691748	501.1740726	220.018226	6.597868994	4.150683517	0.22763438	703.176441	708.2335038	697.7839208	0.303198638	405.8685381	2538.077884	661.8249582	16.77741621	19.65023698	4.113399711	52.30995868
356.1716561	404.3783809	322.0886901	437.6843697	499.2829113	2.857631443	222.6255008	912.6826193	0.29338789	513.0963991	515.8002222	670.3277264	1.535332905	141.3743456	245.9261161	2.255923224	73.37170386	53.14593337	59.26982266	501.1912537	219.9664225	6.597572548	4.150716451	0.227749291	703.1361947	708.2553447	697.7573051	0.303349051	406.197189	2540.758958	661.9756075	16.80248265	19.65405582	4.095156004	52.57732206
356.1704517	404.3761452	322.0843744	437.6824671	499.2797084	2.857110197	222.6199245	912.6836806	0.293363969	513.0530643	515.6023705	670.4234814	1.534869511	141.305914	245.4205097	2.25591183	73.72918111	53.15736366	59.08523128	501.1903179	219.9238792	6.597377903	4.150699503	0.227887539	703.1047041	708.339482	697.715692	0.303477963	406.8940183	2543.812181	662.0807924	16.82769608	19.64055908	4.058726289	52.42406805
356.1692365	404.3739081	322.0800512	437.6805593	499.2765003	2.856598091	222.6143417	912.6847443	0.29334007	513.0095109	515.4353364	670.4463512	1.534321141	141.2065206	244.9972685	2.25590565	73.76304267	53.16734298	58.91877265	501.1636409	219.8999182	6.597680573	4.150599932	0.228034992	703.0870521	708.5274013	697.6682995	0.303574027	407.9914735	2547.349484	662.1146009	16.85074134	19.59480262	3.960912822	52.14597945
356.1680108	404.3716694	322.0757205	437.6786463	499.2732872	2.856095106	222.6087525	912.6858106	0.293316194	512.9672575	515.3015476	670.3930498	1.533817353	141.0912185	244.679754	2.255904648	73.46915961	53.17650852	58.77207322	501.1137233	219.8938149	6.59857711	4.150411019	0.228188173	703.0716759	708.8012052	697.599935	0.303637455	409.3876002	2551.324551	662.0753978	16.86992038	19.69748558	4.135571968	52.41795517
356.1667744	404.3694292	322.0713821	437.6767281	499.270069	2.855601223	222.6031568	912.6868794	0.293292341	512.9224302	515.1986393	670.2870836	1.533093153	140.9473614	244.4467239	2.255907617	72.91414974	53.19326176	58.65973782	501.041691	219.9042218	6.599461533	4.150198755	0.228330214	703.0489303	709.1187043	697.5371	0.303664368	411.1201554	2555.623603	661.9829737	16.8866915	19.72117135	3.887518513	52.17726178
356.1655273	404.3671875	322.0670363	437.6748047	499.2668457	2.855116422	222.5975548	912.6879507	0.29326851	512.8762265	515.1197124	670.1414411	1.53233583	140.8030828	244.315668	2.255912836	72.18831682	53.21374757	58.57875916	500.9588979	219.9235566	6.600312376	4.149974392	0.228455065	702.9867563	709.4131592	697.4507603	0.303665274	412.9389078	2560.065822	661.8524332	16.89903814	19.61401527	3.936580769	51.69406433
356.1642697	404.3649443	322.0626829	437.6728761	499.2636174	2.854640682	222.5919463	912.6890245	0.293244702	512.8320994	515.0478863	669.9763392	1.532015078	140.7154051	244.316788	2.255916858	71.48138765	53.21270446	58.51206467	500.8897407	219.9339172	6.601296923	4.149730998	0.22856939	702.8276232	709.5643674	697.2619422	0.303667462	414.3237141	2564.32651	661.7112891	16.90311098	19.595813	3.927151677	51.73163102
356.1630014	404.3626995	322.058322	437.6709423	499.2603839	2.854173985	222.5863315	912.6901008	0.293220916	512.7899276	514.9791234	669.8088041	1.532183726	140.7041919	244.4609223	2.255918265	70.86207309	53.20245764	58.46522996	500.8416875	219.9315384	6.602211124	4.149503938	0.228653286	702.5436992	709.5122233	696.968829	0.303674738	415.1034688	2568.238638	661.575358	16.89755143	19.66995384	4.107548964	51.89942972
356.1617225	404.3604532	322.0539537	437.6690034	499.2571455	2.85371631	222.5807103	912.6911796	0.293197153	512.7500044	514.9227517	669.6380009	1.532797868	140.7777555	244.7715049	2.255917973	70.25717773	53.22519598	58.45516916	500.8093997	219.9248677	6.6029692	4.149322063	0.228669722	702.1283777	709.2579734	696.6100177	0.303674024	415.2976864	2571.796504	661.4384031	16.88098884	19.63242881	4.068962576	51.85624243
356.1604329	404.3582055	322.0495778	437.6670592	499.253902	2.853267638	222.5750828	912.6922609	0.293173413	512.7124114	514.8739829	669.484912	1.533930852	140.962887	245.2630464	2.255914344	69.74203397	53.3036149	58.48898886	500.8015857	219.9104013	6.603349578	4.149230231	0.228588816	701.5470474	708.7308161	696.1897038	0.303669424	414.6939812	2574.800159	661.3189168	16.8516861	19.5033109	3.883928039	51.69630189
356.1591327	404.3559562	322.0451945	437.6651099	499.2506535	2.852827949	222.5694489	912.6933446	0.293149695	512.67531	514.8262516	669.3817247	1.535514045	141.2786216	245.9351737	2.255905277	69.41702893	53.46878909	58.57954885	500.8265812	219.8848899	6.602865257	4.149304322	0.228370831	700.7635656	707.848292	695.7316378	0.303663177	413.1205246	2577.015983	661.2438821	16.80896628	19.38148351	3.978009904	51.79066761
356.1578219	404.3537054	322.0408038	437.6631554	499.2473999	2.852397223	222.5638087	912.6944308	0.293125999	512.6382368	514.779567	669.3300255	1.537464625	141.7203315	246.7746368	2.255891116	69.28081437	53.72349457	58.72730604	500.8824843	219.8502713	6.601538085	4.149547454	0.228014303	699.8006862	706.6355327	695.2561083	0.303654345	410.6481229	2578.420283	661.2130599	16.75380531	19.32849217	4.078047862	51.95551214
356.1565005	404.3514531	322.0364056	437.6611958	499.2441413	2.851975442	222.5581622	912.6955195	0.293102326	512.6016262	514.7305522	669.3143722	1.539736317	142.2665582	247.7428736	2.255872983	69.33340903	54.02146213	58.91203761	500.9660524	219.8051183	6.599806161	4.149896076	0.227568044	698.7275971	705.1845342	694.7545029	0.303650943	407.4668894	2579.083655	661.2151726	16.68901818	19.21922753	4.214238315	52.55454921
356.1551685	404.3491993	322.032	437.659231	499.2408777	2.851562584	222.5525094	912.6966107	0.293078676	512.5641255	514.6822833	669.3177121	1.542067017	142.8769699	248.7901623	2.255853092	69.51104859	54.33718078	59.12475825	501.0651546	219.7555821	6.597933605	4.150307933	0.227066478	697.6308251	703.6215245	694.2604248	0.303649002	403.950726	2579.158704	661.2326672	16.61865241	19.05261308	4.002811272	52.17320701
356.1538258	404.346944	322.027587	437.657261	499.2376092	2.851158631	222.5468503	912.6977043	0.293055048	512.52391	514.6460674	669.3027603	1.544031111	143.4820945	249.8491613	2.255835907	69.64573154	54.63907717	59.35586733	501.1552079	219.7159172	6.596378923	4.150708863	0.226560333	696.6469173	702.1644235	693.8329267	0.303634726	400.7571439	2578.987252	661.2269303	16.54860952	19.0060288	3.959813095	52.08313682
356.1524726	404.3446872	322.0231666	437.6552859	499.2343356	2.850763562	222.5411849	912.6988003	0.293031443	512.4792927	514.6191024	669.2576131	1.545356476	144.0403862	250.8533673	2.255823126	69.71732548	54.89146353	59.58907645	501.2268887	219.6891877	6.595439386	4.151052715	0.22609283	695.8708717	700.9422478	693.5028593	0.303610788	398.2545689	2578.686681	661.1859733	16.48339773	18.94600393	4.031613167	52.01386345
356.1511087	404.342429	322.0187389	437.6533057	499.231057	2.850377358	222.5355133	912.6998988	0.29300786	512.4277937	514.5880575	669.202106	1.545838635	144.5390952	251.7439459	2.25581374	69.83052174	55.08231952	59.81363496	501.2836512	219.6713115	6.595027691	4.151355714	0.225673745	695.3430376	699.9797386	693.2995037	0.303588605	396.5349115	2578.139229	661.1266757	16.42587635	18.82870908	3.806800175	51.75903779
356.1497342	404.3401692	322.0143037	437.6513203	499.2277735	2.85	222.5298354	912.7009998	0.2929843	512.3667035	514.5472606	669.1247133	1.545096701	144.9226909	252.4285928	2.255809671	69.97345737	55.16701234	60.00795706	501.314049	219.6655924	6.595468178	4.151565161	0.225357386	695.1836384	699.4385999	693.2660077	0.303572782	396.0769032	2577.491512	661.0367117	16.38198223	18.84763602	3.882098498	51.60897179
356.1483491	404.3379079	322.0098613	437.6493298	499.224485	2.849631467	222.5241513	912.7021032	0.292960762	512.2931758	514.4881867	669.008643	1.542718619	145.12415	252.7947059	2.25581314	70.14209307	55.07945774	60.14057847	501.3056099	219.6739507	6.597240544	4.151602461	0.225220612	695.5392138	699.5162904	693.4398678	0.303572387	397.4430448	2576.931652	660.9003261	16.35888072	18.76816537	3.900466933	51.55105006
356.1469535	404.3356452	322.0054115	437.6473341	499.2211915	2.84927174	222.518461	912.703209	0.292937246	512.2073116	514.4088848	668.8584832	1.538697489	145.1363236	252.8290038	2.25582387	70.34866962	54.81754305	60.20572394	501.2587668	219.6941591	6.600276773	4.15146817	0.225268871	696.4037867	700.2137372	693.8144516	0.303590183	400.6159581	2576.5519	660.72243	16.35723538	18.77134603	4.009546997	51.39111321
356.1455472	404.3333809	322.0009543	437.6453334	499.2178931	2.848920799	222.5127645	912.7043173	0.292913753	512.1127203	514.3212405	668.6775832	1.53338365	144.9900975	252.6106268	2.255840989	70.53330339	54.4250722	60.21845634	501.1777337	219.7246161	6.604230716	4.151196404	0.225461599	697.6568394	701.4099673	694.3381978	0.303616755	405.1958208	2576.531216	660.508219	16.37250028	18.79104798	3.867816747	50.94102127
356.1441303	404.3311152	321.9964899	437.6433275	499.2145898	2.848578625	222.5070618	912.7054279	0.292890283	512.0129779	514.2293174	668.4832235	1.527198987	144.729431	252.2167008	2.255862142	70.71439058	53.94416165	60.18968876	501.0745832	219.7577491	6.608658853	4.150836687	0.225754469	699.1553593	702.9381104	694.9454022	0.303651551	410.6360029	2576.944502	660.2772887	16.39976531	18.8477408	3.837434353	50.92783639
356.1427028	404.328848	321.9920182	437.6413164	499.2112815	2.848245197	222.5013529	912.706541	0.292866835	511.9137062	514.1366531	668.3146218	1.52088756	144.4463284	251.7894076	2.255882422	70.96945629	53.45648937	60.14408641	500.9749195	219.7793595	6.612715745	4.150497608	0.226055168	700.6421227	704.4738207	695.5302783	0.303695708	415.9131214	2577.739497	660.0713095	16.42943391	18.8567678	3.833126511	50.97966637
356.1412647	404.3265794	321.9875392	437.6393003	499.2079683	2.847920496	222.4956379	912.7076566	0.29284341	511.8187721	514.0506331	668.1813761	1.514868926	144.174149	251.4060078	2.255900043	71.2775285	52.99982262	60.09059091	500.8872977	219.782929	6.615981311	4.150214803	0.226328052	701.9728625	705.8666854	696.0187948	0.303745838	420.5278302	2579.125438	659.9033865	16.45692828	18.74695785	3.925627976	51.00284622
356.1398161	404.3243092	321.983053	437.6372791	499.2046501	2.847604503	222.4899167	912.7087745	0.292820007	511.7287716	513.9739912	668.0690351	1.509110654	143.8759279	251.0392307	2.255916065	71.57627631	52.54866957	60.01237443	500.8043107	219.76731	6.618535879	4.149942994	0.22661175	703.155846	707.1749197	696.3829049	0.303802105	424.6145373	2581.50332	659.7630788	16.48490711	18.71472522	3.95749514	51.27895105
356.1383568	404.3220376	321.9785595	437.6352527	499.2013271	2.847297197	222.4841894	912.7098948	0.292796626	511.6485217	513.9161422	667.9867584	1.504138438	143.5897683	250.7847862	2.255928364	71.83301887	52.14522968	59.91898118	500.7359966	219.7241267	6.619875215	4.149719741	0.226867206	704.0111056	708.2150419	696.524732	0.303860377	427.566134	2585.167918	659.6647021	16.50777177	18.65831493	3.910229581	51.62005113
356.136887	404.3197646	321.9740587	437.6332213	499.1979991	2.84699856	222.478456	912.7110175	0.292773268	511.58445	513.8924472	667.9422836	1.500643182	143.3679348	250.7779494	2.255934532	71.98180815	51.84878028	59.82734918	500.6939637	219.6446067	6.619368779	4.149593631	0.227038915	704.3050227	708.7497982	696.3206597	0.303911705	428.6054239	2590.487892	659.6224571	16.51761653	18.50119604	3.96053287	52.02134593
356.1354066	404.31749	321.9695508	437.6311848	499.1946663	2.84670857	222.4727164	912.7121426	0.292749933	511.5374899	513.9036208	667.9317248	1.498743144	143.2105685	251.0209011	2.255934653	72.00591564	51.66080307	59.73893843	500.6786199	219.5299828	6.617036149	4.149561718	0.227128427	704.0323326	708.7746133	695.7692418	0.303954384	427.732369	2597.44934	659.6335294	16.51429809	18.455984	4.035574845	51.98971362
356.1339156	404.315214	321.9650357	437.6291432	499.1913285	2.846427209	222.4669708	912.7132701	0.29272662	511.5055728	513.939474	667.956076	1.498328076	143.1174859	251.4608368	2.255929269	71.96433294	51.5711845	59.65910475	500.6907856	219.3878426	6.613189707	4.149627697	0.227140151	703.3041153	708.3645195	694.95713	0.303990917	425.2620781	2605.511076	659.6944002	16.50004845	18.42347733	3.885038435	51.75462813
356.132414	404.3129365	321.9605133	437.6270965	499.1879859	2.846154457	222.4612191	912.7144	0.292703329	511.4857398	513.9918132	668.0003812	1.499128676	143.057819	252.011815	2.25592053	71.86395747	51.54633973	59.58522039	500.7225016	219.2297696	6.608361374	4.149756861	0.227108556	702.2889932	707.6834497	693.9863978	0.304021336	421.7827354	2614.26593	659.7863494	16.47979575	18.46576364	4.071195232	51.43174607
356.1309018	404.3106576	321.9559838	437.6250447	499.1846385	2.845890294	222.4554614	912.7155323	0.292680061	511.4709221	514.0445312	668.0320822	1.500404873	142.9483696	252.4821694	2.255913237	71.70916309	51.50166327	59.50037751	500.752963	219.0765994	6.603640179	4.149858047	0.227122667	701.3395082	707.1012577	693.0490523	0.30404838	418.5567339	2623.137215	659.8698983	16.46502146	18.55537424	4.444669854	51.89223098
356.1293791	404.3083772	321.9514472	437.6229878	499.1812861	2.845634701	222.4496976	912.7166669	0.292656815	511.4593098	514.0906665	668.0406637	1.502070828	142.7832555	252.8210137	2.255908747	71.51830782	51.42146691	59.41239186	500.7797251	218.9394629	6.599459869	4.149919389	0.227194262	700.5837799	706.7176461	692.2376628	0.304070257	415.9965443	2631.575987	659.9309125	16.45805733	18.58209654	3.842980209	51.47653851
356.1278458	404.3060954	321.9469034	437.6209259	499.1779289	2.845387657	222.4439277	912.717804	0.292633592	511.455292	514.1375434	668.0300241	1.504736454	142.6233786	253.1294874	2.255905335	71.27468426	51.35530722	59.34933337	500.8155447	218.8184891	6.59555484	4.149991969	0.227267397	699.8971754	706.3598072	691.513851	0.304078121	413.6286988	2639.325245	659.9756043	16.45214409	18.57867605	3.970354277	51.51799191
356.1263019	404.3038121	321.9423524	437.6188589	499.1745669	2.845149143	222.4381518	912.7189433	0.292610391	511.4570424	514.1781416	667.9867461	1.508355144	142.4704053	253.3611435	2.255904531	70.99680638	51.28962892	59.32536707	500.8587062	218.7276639	6.59243981	4.150066874	0.227348708	699.4235677	706.1296087	690.9871182	0.304068161	411.9054575	2645.665451	659.986299	16.44914012	18.60652218	3.988930433	51.24192545
356.1247474	404.3015274	321.9377944	437.6167869	499.1712	2.84491914	222.43237	912.7200851	0.292587213	511.4617937	514.2018019	667.8983894	1.512832259	142.331264	253.4556664	2.255908023	70.73057352	51.20934725	59.35947574	500.9084239	218.6842405	6.590754139	4.150140739	0.227441638	699.3496266	706.1514558	690.8031736	0.304037059	411.3869459	2649.614574	659.9441219	16.45126088	18.72553149	3.871308007	51.24637368
356.1231824	404.2992412	321.9332292	437.6147098	499.1678283	2.844697627	222.4265821	912.7212291	0.292564057	511.4694115	514.208955	667.7639688	1.518147683	142.217617	253.4283682	2.255915706	70.48447388	51.12343735	59.45781169	500.9649478	218.6883023	6.590505925	4.150218485	0.227533739	699.6583374	706.3976392	690.9555847	0.303984091	412.002007	2651.090123	659.8476125	16.45738797	18.91007121	4.009242048	51.76264315
356.1216068	404.2969535	321.928657	437.6126276	499.1644518	2.844484586	222.4207883	912.7223756	0.292540923	511.4778144	514.2007947	667.5836643	1.523841849	142.09915	253.2619242	2.255927905	70.25728772	51.0186276	59.59986039	501.0186014	218.7307549	6.591580696	4.15026875	0.227643961	700.3113702	706.8831674	691.3808089	0.303916201	413.6834338	2650.682609	659.6979649	16.46951442	19.13300339	3.89229679	51.55890447
356.1200207	404.2946645	321.9240777	437.6105404	499.1610704	2.844279995	222.4149884	912.7235244	0.292517812	511.4876603	514.1836338	667.368567	1.529795494	141.9876715	253.015804	2.255943159	70.05463592	50.91820515	59.77898462	501.0692943	218.7975136	6.593528148	4.150301549	0.227749572	701.1515692	707.4789369	691.9622198	0.303837688	415.9123439	2648.985522	659.5090306	16.48469128	19.44070428	3.924812563	51.56065695
356.118424	404.292374	321.9194913	437.6084481	499.1576843	2.844083836	222.4091827	912.7246755	0.292494723	511.5029335	514.1737992	667.1445758	1.536139829	141.923907	252.8445472	2.255957715	69.86523653	50.88339118	59.98844696	501.1236178	218.8601224	6.595279551	4.150358268	0.227791905	701.8173745	707.8689005	692.4524082	0.303753266	417.4824703	2647.175405	659.3143052	16.49477235	19.46261358	3.933933597	52.18720099
356.1168168	404.290082	321.9148979	437.6063509	499.1542933	2.843896089	222.403371	912.7258289	0.292471656	511.5218878	514.174023	666.9180272	1.542457643	141.9010668	252.7665806	2.255971127	69.70856085	50.91869602	60.21619986	501.175619	218.9072011	6.596599659	4.150428542	0.227765636	702.2237651	708.0028014	692.7686339	0.303669526	418.1235415	2645.77598	659.1206755	16.49925262	19.54227298	3.882287091	52.64066161
356.115199	404.2877886	321.9102974	437.6042485	499.1508976	2.843716734	222.3975533	912.7269847	0.292448612	511.5388126	514.1750366	666.6788038	1.54808379	141.8971096	252.7051436	2.255985466	69.64050842	50.99397057	60.46094603	501.2142015	218.9465496	6.598021803	4.150479557	0.227691071	702.529384	708.0279425	692.9977283	0.303590739	418.3414779	2644.379995	658.9115332	16.5022541	19.77159929	3.8904199	52.17187329
356.1135706	404.2854938	321.90569	437.6021412	499.1474971	2.843545752	222.3917298	912.7281428	0.292425591	511.550746	514.1790186	666.434692	1.552409471	141.900438	252.672393	2.25600041	69.69447741	51.11015847	60.70703013	501.2308135	218.9648934	6.59931357	4.150495598	0.227564621	702.651927	707.9036375	693.0500344	0.30352585	417.8698863	2643.588544	658.6943684	16.50375183	19.78095115	3.872921278	51.98904198
356.1119317	404.2831976	321.9010755	437.6000288	499.1440918	2.843383122	222.3859004	912.7293032	0.292402591	511.5533562	514.1878419	666.1941059	1.554571193	141.8811067	252.6625079	2.256015928	69.90726686	51.2572762	60.9275382	501.2119078	218.945292	6.600220578	4.150444441	0.227396029	702.5098957	707.6156375	692.8168487	0.303487618	416.4696194	2644.260651	658.4772683	16.50524119	19.77887091	4.023252984	51.99722289
356.1102822	404.2808999	321.8964541	437.5979114	499.1406818	2.843228825	222.380065	912.730466	0.292379615	511.5449032	514.1995374	665.9591853	1.554403299	141.8346485	252.662138	2.256031696	70.28203123	51.42466135	61.1158283	501.156051	218.8886862	6.600795917	4.150322163	0.227194642	702.137391	707.2002863	692.316078	0.303477423	414.2560779	2646.365687	658.2614112	16.50746768	19.72731099	3.907145167	51.67852684
356.1086222	404.2786008	321.8918256	437.595789	499.137267	2.843082842	222.3742238	912.731631	0.29235666	511.5288876	514.216695	665.7380974	1.552593076	141.7912293	252.7159453	2.25604526	70.76225695	51.62393524	61.27632109	501.0773428	218.8000206	6.600849106	4.150168257	0.226953106	701.5132327	706.6085888	691.5717845	0.303487282	411.1567867	2649.66534	658.0583584	16.50730026	19.75644106	3.914767619	51.67833221
356.1069517	404.2763003	321.8871903	437.5936616	499.1338474	2.842945152	222.3683768	912.7327983	0.292333728	511.5056305	514.2346896	665.5293283	1.549522066	141.7560367	252.7964774	2.256055865	71.3085918	51.83619079	61.4101536	500.9832459	218.6932318	6.600628162	4.149995421	0.226692445	700.7645712	705.9341237	690.6963235	0.303510326	407.5984997	2653.575591	657.8661328	16.50567057	19.71836445	3.849713294	51.51114849
356.1052706	404.2739984	321.8825479	437.5915292	499.1304231	2.842815736	222.3625239	912.733968	0.292310818	511.4751838	514.2419633	665.3210523	1.545834907	141.7338767	252.8252676	2.256063639	71.86863574	52.02231815	61.52890315	500.884771	218.5993984	6.600852639	4.149816947	0.22645239	700.1862313	705.3941301	689.9385533	0.303533026	404.5533783	2656.734908	657.669744	16.50566043	19.73106071	3.835604391	51.05537259
356.103579	404.271695	321.8778987	437.5893918	499.1269941	2.842694575	222.3566652	912.7351399	0.292287931	511.4388242	514.2369308	665.119766	1.541993654	141.7330624	252.7992127	2.25606672	72.38948752	52.16949574	61.62681625	500.7919183	218.5270018	6.601522351	4.149654992	0.226251136	699.8446403	705.0361302	689.3689507	0.3035495	402.2542448	2658.837384	657.4773227	16.50705176	19.76234023	3.921307056	51.25208726
356.1018769	404.2693903	321.8732425	437.5872494	499.1235604	2.842581648	222.3508006	912.7363142	0.292265066	511.3957543	514.2235537	664.9446027	1.537816591	141.7426392	252.7415807	2.256062704	72.84896077	52.27138757	61.67511336	500.7049909	218.4634012	6.602170343	4.149513618	0.22610195	699.6526528	704.8228479	688.908164	0.303565796	400.4460218	2660.595455	657.3112505	16.50932989	19.87398025	3.932319901	51.58004384
356.1001642	404.2670841	321.8685795	437.585102	499.1201219	2.842476936	222.3449303	912.7374907	0.292242223	511.347655	514.2003556	664.8057552	1.533865072	141.7682864	252.6472212	2.256049139	73.17821223	52.31023938	61.66243467	500.6361899	218.4173759	6.602737798	4.149419135	0.226031128	699.6834258	704.813002	688.6334573	0.303575581	399.3933708	2661.743737	657.1842562	16.51247334	19.83282004	3.940497937	51.59402875
356.0984409	404.2647765	321.8639095	437.5829496	499.1166787	2.842380419	222.3390542	912.7386695	0.292219402	511.298299	514.1677663	664.7176618	1.531044615	141.8268216	252.5324095	2.256022511	73.28022429	52.27474978	61.57843768	500.6041944	218.3986779	6.603034875	4.149415335	0.226062094	699.9875571	705.0355836	688.622721	0.303569206	399.2891791	2661.988294	657.1153894	16.51509709	19.71813418	3.942933771	51.86404321
356.0967072	404.2624675	321.8592327	437.5807922	499.1132309	2.842292077	222.3331723	912.7398505	0.292196604	511.2498754	514.1267141	664.685391	1.529443456	141.9135723	252.406129	2.255983204	73.15091731	52.16612053	61.42182079	500.6106029	218.4049564	6.602976156	4.149502486	0.226194825	700.5425824	705.4779695	688.8571422	0.303547443	400.1025064	2661.520151	657.1105692	16.51702008	19.70717633	3.949184351	51.44755741
356.0949629	404.2601572	321.8545491	437.5786299	499.1097783	2.842211892	222.3272846	912.7410339	0.292173829	511.2048901	514.0748994	664.6959712	1.528827784	142.0160772	252.2529496	2.255935931	72.85539658	51.99425705	61.21715824	500.6473396	218.4367119	6.602901367	4.149650989	0.226408987	701.3587917	706.1430807	689.3262353	0.303512787	401.9185348	2660.303472	657.1529748	16.51941039	19.79427879	3.952268598	51.34881838
356.0932081	404.2578454	321.8498585	437.5764626	499.1063211	2.842139842	222.3213912	912.7422194	0.292151075	511.166693	514.0152086	664.746565	1.528874636	142.1219423	252.0953991	2.255884433	72.45841819	51.78218464	60.97932357	500.7058367	218.4823814	6.602767194	4.149835318	0.226674071	702.3269815	706.9469421	689.9252877	0.303471965	404.4397561	2658.87894	657.2384982	16.52184368	19.83465281	3.882739101	51.03011865
356.0914428	404.2555322	321.8451612	437.5742903	499.1028591	2.842075909	222.3154921	912.7434073	0.292128344	511.1383052	513.9542835	664.8345377	1.52869744	142.2065147	251.9776856	2.255834348	72.08436558	51.57077094	60.72396622	500.7665165	218.515042	6.602352495	4.150005591	0.22693638	703.2121268	707.7190722	690.4268313	0.303440835	406.9705333	2658.453616	657.3624913	16.52350023	19.82166372	4.01403525	51.58812345
356.089667	404.2532176	321.840457	437.572113	499.0993926	2.842020072	222.3095872	912.7445974	0.292105635	511.1251241	513.8937148	664.9528005	1.528222777	142.2585088	251.9138999	2.255790304	71.79087857	51.38320821	60.4752908	500.8236181	218.5287257	6.601752374	4.150138304	0.227165662	703.941738	708.3957625	690.7623276	0.303422778	409.3494688	2659.338092	657.5163472	16.52426201	19.80118836	3.8909136	51.26886621
356.0878806	404.2509016	321.8357461	437.5699308	499.0959213	2.841972312	222.3036766	912.7457898	0.292082949	511.1350885	513.8331358	665.100835	1.528289794	142.282627	251.9104801	2.255753815	71.54014343	51.22558576	60.25173197	500.8889497	218.5330209	6.601070156	4.150249695	0.227360479	704.5515878	708.9848191	690.9861144	0.303409538	411.7720439	2661.24558	657.7013587	16.52366182	19.83421848	3.93053818	51.7846966
356.0860838	404.2485842	321.8310284	437.5677437	499.0924454	2.84193261	222.2977604	912.7469844	0.292060285	511.1759113	513.774875	665.2688813	1.528942172	142.2672146	251.9876945	2.255730705	71.3971621	51.12968239	60.08650995	500.9570589	218.5216767	6.600424298	4.150314045	0.227481518	704.9497883	709.4006698	691.0175306	0.303403875	414.0330799	2664.513959	657.9063489	16.52133906	19.81804156	4.004882311	51.82959004
356.0842764	404.2462655	321.8263038	437.5655515	499.0889649	2.841900945	222.2918385	912.7481812	0.292037643	511.2564885	513.7203166	665.4393887	1.530181559	142.1980861	252.159094	2.255728832	71.45299119	51.13378797	60.0262652	501.0195224	218.4898733	6.600102998	4.150294687	0.227478798	705.0514945	709.556126	690.7775018	0.303408554	415.9620858	2669.388694	658.1107434	16.51732184	19.76876459	3.874804963	51.89547802
356.0824585	404.2439453	321.8215726	437.5633545	499.0854797	2.841877298	222.2859109	912.7493803	0.292015023	511.3741814	513.6694151	665.6072726	1.532058549	142.0788175	252.4275121	2.255748423	71.69826881	51.24030932	60.0761999	501.0766088	218.4394492	6.600118807	4.15019472	0.227349411	704.8666284	709.452955	690.2809125	0.303421798	417.5013798	2675.726528	658.3093156	16.51134445	19.71987433	4.019185294	52.39063693
356.0806301	404.2416238	321.8168346	437.5611525	499.0819899	2.841861649	222.2799776	912.7505816	0.291992426	511.5126449	513.6220602	665.7740307	1.534016667	141.9200525	252.7904135	2.255784361	72.09201812	51.42876417	60.2053773	501.1244828	218.3680562	6.600213318	4.150028495	0.22711589	704.4235879	709.1302116	689.550381	0.303445409	418.4429137	2683.395721	658.5038131	16.50307223	19.73754825	3.921408637	51.90730706
356.0787912	404.2393009	321.8120898	437.5589456	499.0784955	2.841853978	222.2740387	912.7517851	0.291969851	511.6566497	513.5756586	665.938177	1.535943351	141.7399664	253.2304288	2.255831009	72.55663896	51.67042604	60.38800688	501.1666539	218.2843701	6.600287937	4.149824726	0.226812367	703.8336412	708.6801286	688.6913696	0.303474403	418.842375	2691.787303	658.6933726	16.49247853	19.82293707	3.956240205	51.72355394
356.0769418	404.2369766	321.8073384	437.5567337	499.0749965	2.841854267	222.2680942	912.7529908	0.291947298	511.7839443	513.5249057	666.1039781	1.538012709	141.5726607	253.7120614	2.25587749	72.92808938	51.90744159	60.57466353	501.2164786	218.2084999	6.600180724	4.149645996	0.226511117	703.3254176	708.2894412	687.9243327	0.303496703	419.0050729	2699.726943	658.8847962	16.47963059	19.85182348	4.02528917	51.71401457
356.0750819	404.2346509	321.8025803	437.5545169	499.0714929	2.841862494	222.2621441	912.7541988	0.291924768	511.8759721	513.4680121	666.2647808	1.539811607	141.436648	254.2224747	2.25591858	73.15126531	52.11783336	60.74171829	501.2717904	218.1450548	6.599775436	4.149512561	0.226236108	702.9788103	708.0253512	687.3237874	0.303509965	418.8147569	2706.686508	659.0710648	16.46430288	19.97514053	4.298782486	52.01640114
356.0732115	404.2323238	321.7978154	437.5522952	499.0679847	2.841878641	222.2561884	912.7554089	0.29190226	511.9239423	513.4059429	666.39924	1.540751564	141.3347825	254.7691829	2.255956725	73.27981824	52.3224492	60.90817843	501.3192372	218.0886623	6.599164862	4.149403006	0.225956261	702.744808	707.8372363	686.8433113	0.303517684	417.8818547	2712.614741	659.2275861	16.4460789	20.07282497	3.912742527	51.75721735
356.0713306	404.2299954	321.7930439	437.5500686	499.0644719	2.841902687	222.2502271	912.7566213	0.291879774	511.9040805	513.3363757	666.4959459	1.540241301	141.2911961	255.3350595	2.255985719	73.25473207	52.49669737	61.04752218	501.3543051	218.0448587	6.598241824	4.149339331	0.2256972	702.7196315	707.8033983	686.5719069	0.303517295	416.0358355	2716.822218	659.3419409	16.424688	20.25923113	3.939257742	51.68293071
356.0694392	404.2276656	321.7882658	437.5478371	499.0609545	2.841934613	222.2442603	912.7578359	0.29185731	511.7855556	513.2568125	666.5434881	1.537380062	141.3347402	255.8998357	2.255997154	73.0068895	52.6076396	61.11975915	501.369605	218.0177187	6.59680845	4.149347284	0.225493039	703.0094489	708.0170994	686.6040115	0.303507648	413.0187518	2718.568034	659.4014871	16.3998539	20.29076796	3.867429489	51.73564845
356.0675373	404.2253345	321.783481	437.5456006	499.0574326	2.8419744	222.2382879	912.7590526	0.291834869	511.5726255	513.1686951	666.5372327	1.532098951	141.465853	256.456049	2.255990685	72.55590664	52.6556966	61.12558783	501.3627075	218.0064194	6.594934845	4.14942234	0.225345024	703.6012467	708.4678515	686.9319785	0.30349026	408.8585088	2717.857194	659.4014725	16.37184455	20.21476327	4.002093428	51.74125598
356.0656249	404.223002	321.7786896	437.5433593	499.0539061	2.842022027	222.2323099	912.7602716	0.29181245	511.2979616	513.075515	666.4897438	1.525265874	141.6678905	256.9931188	2.255968376	71.93420983	52.64336778	61.07500778	501.343836	218.0122531	6.592814612	4.14955915	0.225261772	704.4547449	709.1260271	687.5321101	0.303465407	404.0722695	2715.10131	659.3574969	16.3418089	20.08740829	3.917761919	51.54987571
356.0637021	404.2206681	321.7738916	437.541113	499.050375	2.842077475	222.2263265	912.7614927	0.291790053	510.9965603	512.9826697	666.4071091	1.517437294	141.9168096	257.5114424	2.255935202	71.23337989	52.59229659	60.99198269	501.3148765	218.0285684	6.590679457	4.14972999	0.225226317	705.451574	709.8982193	688.3048268	0.303438453	398.9623478	2711.034105	659.2771118	16.31073543	19.99383519	3.971277726	51.69602395
356.0617687	404.2183328	321.7690869	437.5388619	499.0468394	2.842140724	222.2203375	912.762716	0.291767678	510.7276981	512.8993854	666.2965053	1.509509233	142.1652264	258.0270929	2.255903092	70.63910309	52.5573499	60.93462638	501.2757787	218.0402438	6.588946822	4.149873679	0.225184932	706.345316	710.5832814	689.0349391	0.303419865	393.879851	2707.094782	659.1687808	16.27991028	19.96710056	3.974542006	51.87963138
356.0598249	404.2159962	321.7642757	437.5366059	499.0432993	2.842211754	222.214343	912.7639415	0.291745326	510.5280822	512.8306177	666.1687221	1.502119824	142.3925846	258.5279481	2.255874646	70.22246527	52.546311	60.91400001	501.2317129	218.0437754	6.587847435	4.14997228	0.225139497	707.0534451	711.1215072	689.6566348	0.30341399	389.3016276	2703.902338	659.0456774	16.25065576	19.97290399	3.888771359	51.40032856
356.0578706	404.2136583	321.759458	437.5343449	499.0397546	2.842290547	222.208343	912.7651691	0.291722996	510.4009681	512.776846	666.0285692	1.495153953	142.6097866	258.9784608	2.255843149	69.95563528	52.52572749	60.89534106	501.1849024	218.0437468	6.587392593	4.150043579	0.225135482	707.6420705	711.5805702	690.2343587	0.303421307	385.5560854	2701.19274	658.9142141	16.22395106	19.93995686	3.91174213	51.23516494
356.0559058	404.211319	321.7546336	437.5320792	499.0362054	2.842377081	222.2023376	912.7663989	0.291700688	510.3914594	512.7439313	665.8915863	1.489358576	142.792195	259.3600692	2.255810988	69.92279869	52.50059287	60.88671141	501.1419688	218.0359977	6.587854991	4.150067255	0.225180724	708.0173798	711.8963523	690.6921419	0.303447518	383.2724036	2699.725162	658.7929999	16.20151162	19.91575263	3.85297697	51.14402337
356.0539306	404.2089783	321.7498028	437.5298085	499.0326517	2.842471338	222.1963267	912.7676309	0.291678402	510.557842	512.7387211	665.7817001	1.485853559	142.9079088	259.6495611	2.255781083	70.2155308	52.47414145	60.89691692	501.1148034	218.0171224	6.589564828	4.150022692	0.225289733	708.0753308	711.999897	690.9476649	0.303498339	383.3247404	2700.445256	658.7104698	16.1855178	19.97439992	3.870205242	51.6350665
356.0519448	404.2066363	321.7449654	437.527533	499.0290935	2.842573297	222.1903104	912.768865	0.291656139	510.9007299	512.7651122	665.7015033	1.484701896	142.951881	259.8320571	2.255753398	70.8230037	52.44107041	60.92019872	501.1043164	217.9882486	6.592457518	4.149913401	0.225464471	707.8254979	711.9016492	691.0103233	0.303572515	385.763509	2703.235474	658.6682788	16.17673146	19.98381464	3.913658006	51.32146338
356.0499487	404.204293	321.7401215	437.5252526	499.0255308	2.84268294	222.1842886	912.7701013	0.291633897	511.3872992	512.8275488	665.637571	1.485471351	142.922429	259.9169473	2.255731678	71.70117284	52.41659586	60.9685157	501.1029645	217.9493347	6.596221062	4.14974185	0.225663281	707.2853175	711.6013168	690.8881875	0.303664434	389.9327783	2707.549815	658.6471412	16.17481929	19.95001482	3.859014296	51.46025575
356.047942	404.2019483	321.7352711	437.5229673	499.0219636	2.842800245	222.1782614	912.7713397	0.291611678	511.9728323	512.928456	665.5789857	1.487585039	142.8312959	259.8974606	2.255714776	72.7458522	52.39058109	61.02828066	501.1058844	217.9063931	6.600440011	4.149533069	0.225873796	706.5590726	711.1741755	690.667529	0.303765327	395.2495824	2712.410133	658.6307114	16.17957625	19.96306118	3.915799506	51.46867885
356.0459249	404.1996023	321.7304142	437.5206772	499.0183919	2.842925194	222.1722288	912.7725803	0.291589481	512.5678622	513.0670304	665.5027263	1.489713063	142.7159061	259.7625307	2.255696654	73.74753141	52.33167757	61.06101502	501.1031124	217.8723806	6.604378596	4.149342194	0.226093668	705.8800983	710.7947275	690.5441979	0.303859708	400.6461554	2715.874998	658.5873185	16.1899534	19.91820682	3.876242904	51.64634894
356.0438973	404.1972549	321.7255508	437.5183822	499.0148158	2.843057767	222.1661909	912.7738229	0.291567307	513.1340035	513.2481541	665.4019027	1.491479973	142.5757696	259.5115238	2.255679423	74.62144116	52.24156559	61.06503172	501.0907531	217.8507797	6.607611471	4.149185033	0.226293863	705.3125016	710.504742	690.5659076	0.303939188	405.5351585	2717.18956	658.5040811	16.20601733	19.97707238	3.9241137	51.60946855
356.0418592	404.1949062	321.720681	437.5160824	499.0112352	2.843197944	222.1601475	912.7750677	0.291545154	513.6935954	513.4815103	665.2933458	1.493613188	142.3756572	259.1384091	2.25567006	75.40058848	52.13755114	61.058998	501.0753324	217.8381169	6.610088285	4.149046251	0.226446888	704.7778757	710.243985	690.6595451	0.30400323	410.1265301	2716.814175	658.3966557	16.22946916	20.01885372	3.857261067	51.5541638
356.0398107	404.1925562	321.7158048	437.5137778	499.0076502	2.843345706	222.1540988	912.7763147	0.291523024	514.2012347	513.7732252	665.1718343	1.495746979	142.1113963	258.6455639	2.255671975	75.98114374	52.02370522	61.04303718	501.053461	217.8383071	6.611272709	4.148944269	0.226514242	704.3483847	710.0590155	690.8761722	0.304041357	413.719517	2713.899142	658.2525621	16.26044539	20.17384716	4.004201019	51.70108643
356.0377517	404.1902048	321.7109221	437.5114683	499.0040607	2.843501032	222.1480447	912.7775637	0.291500916	514.5977893	514.1302641	665.0276327	1.497367563	141.7774665	258.0458573	2.255690695	76.24210854	51.91329125	61.02529798	501.019135	217.8547769	6.610498763	4.148897316	0.226437101	704.098185	709.9913134	691.2640208	0.304040817	415.3233601	2707.432942	658.0525829	16.29873194	20.19587297	4.024176784	51.77233651
356.0356823	404.1878521	321.706033	437.5091539	499.0004667	2.843663904	222.1419854	912.7788149	0.29147883	514.8772495	514.5463738	664.8673856	1.498534762	141.3763644	257.3576768	2.255726967	76.18250318	51.81307223	61.01049835	500.9741805	217.8861977	6.607804124	4.148908021	0.226210182	704.0210225	710.0344602	691.8071129	0.30400131	414.9273412	2697.604446	657.8032912	16.34357495	20.1348689	4.025442227	52.01893162
356.0336024	404.1854981	321.7011376	437.5068348	498.9968684	2.8438343	222.1359206	912.7800682	0.291456766	515.0418714	514.9977048	664.6974524	1.499086162	140.9442302	256.6122469	2.255773382	75.83617515	51.7133073	60.98634046	500.9208518	217.9312992	6.603663031	4.148985976	0.225879446	704.1320745	710.2064505	692.5103134	0.303929305	412.912806	2684.949849	657.5169321	16.39230291	20.17886753	4.089634335	52.38560952
356.0315121	404.1831428	321.6962357	437.5045108	498.9932656	2.844012203	222.1298506	912.7813236	0.291434724	515.1198693	515.4625715	664.5338415	1.499366689	140.4976329	255.848889	2.255826829	75.30066712	51.62182065	60.95982368	500.8649803	217.9837307	6.598709979	4.149120789	0.225476855	704.3584483	710.4564634	693.2999899	0.303834941	409.9123212	2670.651805	657.2168651	16.44266405	20.34494375	3.914076237	52.46245416
356.0294113	404.1807861	321.6913275	437.502182	498.9896584	2.844197591	222.1237753	912.782581	0.291412705	515.189762	515.9119539	664.4085166	1.500392341	140.0464971	255.1163408	2.255883814	74.79242404	51.55385116	60.94837293	500.8193448	218.0307257	6.59413904	4.149278981	0.225059588	704.5187456	710.6581458	694.0106749	0.303738836	407.3371972	2657.075501	656.9493862	16.49223711	20.57151431	3.962493474	52.56438427
356.0273001	404.1784282	321.6864129	437.4998484	498.9860467	2.844390446	222.1176948	912.7838406	0.291390707	515.2586986	516.3171008	664.3331073	1.502176282	139.6236399	254.4699817	2.255939276	74.3739403	51.51446466	60.95429798	500.7877718	218.0675121	6.590530342	4.149461643	0.224661874	704.5845151	710.792133	694.6017856	0.303649268	405.5939037	2645.170609	656.732916	16.53730325	20.6726823	3.970431963	52.10645964
356.0251784	404.1760689	321.681492	437.49751	498.9824307	2.844590747	222.1116089	912.7851023	0.291368732	515.2679967	516.6574341	664.3026686	1.50400171	139.2640841	253.9696349	2.255991445	73.96093189	51.5113831	60.97843417	500.7663379	218.0955491	6.587724679	4.149694837	0.224269124	704.6412653	710.9125173	695.1219661	0.303560618	404.0118346	2634.55554	656.5598318	16.57378786	20.9405826	3.996259012	52.17577844
356.0230463	404.1737083	321.6765648	437.4951668	498.9788103	2.844798475	222.1055178	912.786366	0.291346779	515.220435	516.8954264	664.3293276	1.505787071	139.0124965	253.6915535	2.256033954	73.62294114	51.55245262	61.02498196	500.7588628	218.1090208	6.586421424	4.14998148	0.223921188	704.6615033	710.9992339	695.5262623	0.303482676	402.996417	2626.355745	656.4504937	16.59646431	21.16458223	4.002589766	51.83160187
356.0209038	404.1713464	321.6716312	437.4928187	498.9751856	2.84501361	222.0994215	912.7876318	0.291324848	515.1181151	516.9835046	664.4246901	1.507305587	138.9312775	253.725776	2.256056927	73.44121213	51.64060466	61.09259444	500.7690748	218.101893	6.587512519	4.150328588	0.22367806	704.6295825	711.0432103	695.7785074	0.303427994	403.0667122	2621.860082	656.4273111	16.5987729	21.28446717	4.015064238	52.44154409
356.0187508	404.1689832	321.6666914	437.4904659	498.9715564	2.845236133	222.0933199	912.7888997	0.29130294	514.9555547	516.9167421	664.5865466	1.508371505	139.0314217	254.081706	2.256059619	73.40612946	51.77354683	61.17865442	500.7959166	218.0740028	6.590938933	4.150727034	0.223543744	704.5568753	711.0483953	695.8843454	0.303396556	404.1441031	2621.085647	656.489693	16.57983749	21.30690926	3.966708915	52.37435045
356.0165874	404.1666186	321.6617453	437.4881083	498.9679229	2.845466023	222.0872132	912.7901697	0.291281053	514.7671038	516.7266648	664.8099481	1.509338931	139.2723357	254.6850553	2.256047841	73.5228831	51.94113716	61.27977445	500.838848	218.026619	6.596222026	4.151132477	0.223502676	704.4011144	710.9795756	695.8286488	0.303385929	406.3234732	2623.731085	656.6321967	16.54462749	21.36263408	3.935703068	51.79816402
356.0144136	404.1642528	321.6567929	437.4857459	498.964285	2.845703262	222.0811012	912.7914417	0.291259188	514.5495651	516.4445194	665.0787508	1.510023314	139.6263273	255.466616	2.256026584	73.7159794	52.12813626	61.38507808	500.8925129	217.9651336	6.602558597	4.151517449	0.223527272	704.199973	710.8567674	695.6615733	0.303387272	409.1623002	2628.760924	656.8344491	16.49739612	21.40753435	3.941221593	51.50240381
356.0122293	404.1618857	321.6518343	437.4833787	498.9606428	2.845947828	222.0749841	912.7927158	0.291237346	514.2719214	516.1293205	665.3607008	1.5099291	140.0405304	256.3062965	2.256006074	73.80049339	52.31171597	61.47726101	500.9454438	217.9014848	6.608327412	4.151854773	0.223547467	704.0600027	710.7444455	695.5030913	0.303379637	411.5065288	2633.844658	657.0517317	16.44552412	21.2502207	3.889606707	51.38556907
356.0100346	404.1595173	321.6468694	437.4810068	498.9569962	2.846199704	222.0688617	912.7939919	0.291215526	513.9548763	515.8128077	665.6406352	1.509049298	140.4856899	257.1265142	2.255990546	73.74733184	52.47377842	61.54527902	500.9934309	217.8393045	6.612891683	4.152100478	0.223550739	703.9810604	710.6358301	695.377827	0.303358576	413.2179278	2638.298799	657.2681411	16.39350539	20.97704565	3.882570542	51.39807542
356.0078295	404.1571475	321.6418983	437.47863	498.9533453	2.846458868	222.0627343	912.7952701	0.291193728	513.6412916	515.4842125	665.9176235	1.507453482	140.9820363	257.92902	2.255975297	73.64927047	52.60266881	61.58232842	501.037598	217.7747122	6.616659202	4.152213924	0.223585744	703.9057754	710.4877054	695.2458488	0.303334923	414.9119062	2642.966574	657.4933265	16.34044537	20.84126654	3.844693601	51.32002109
356.005614	404.1547765	321.636921	437.4762485	498.9496901	2.846725302	222.0566017	912.7965503	0.291171952	513.3632182	515.1832236	666.1711835	1.505141439	141.494511	258.6135444	2.255964814	73.48262632	52.67356273	61.57336292	501.0724629	217.7120981	6.618899019	4.152137554	0.22364361	703.8281612	710.2882953	695.1368128	0.303304544	416.49654	2647.050663	657.7068937	16.29187602	20.82516827	4.046242025	51.40647528
356.003388	404.1524042	321.6319375	437.4738623	498.9460305	2.846998985	222.050464	912.7978326	0.291150198	513.1732359	514.9654183	666.3778675	1.502320868	141.9676238	259.0408522	2.255965876	73.23544485	52.65600538	61.50147345	501.0923211	217.6564947	6.618714838	4.151794964	0.223711506	703.7177749	710.0078447	695.072842	0.303262993	417.9877191	2649.629194	657.8853619	16.25560988	20.71809573	3.989022738	51.20533119
356.0011517	404.1500307	321.6269478	437.4714713	498.9423667	2.847279898	222.0443211	912.7991169	0.291128466	513.0826646	514.835847	666.5351445	1.499134086	142.3900919	259.1903295	2.255977614	72.92836488	52.54807659	61.36870573	501.0967037	217.6086972	6.616169106	4.151190456	0.223795634	703.5662644	709.6441249	695.0532597	0.303212562	419.441091	2650.760151	658.0271443	16.23277308	20.43362007	4.090741013	50.87807442
355.9989049	404.1476558	321.621952	437.4690755	498.9386985	2.847568021	222.0381732	912.8004032	0.291106756	513.047782	514.7811495	666.6507928	1.495634618	142.7566329	259.0984913	2.255997964	72.5297838	52.37139391	61.19320358	501.0865083	217.5708278	6.61153535	4.150407232	0.223877446	703.4265193	709.2479276	695.1009398	0.303151475	420.4234585	2650.375175	658.1337297	16.22199139	20.14427567	3.956946957	50.96235818
355.9966477	404.1452796	321.61695	437.466675	498.9350261	2.847863335	222.0320201	912.8016916	0.291085068	513.0531634	514.7746566	666.7405122	1.492136747	143.073186	258.8209648	2.256021586	72.09167313	52.14956155	60.996413	501.06615	217.5408442	6.605608408	4.149520351	0.22396923	703.2953674	708.8330516	695.1902925	0.303086801	421.0347769	2649.252014	658.2206742	16.22073091	20.00310344	3.898653571	50.29837278
355.9943801	404.1429022	321.6119419	437.4642697	498.9313494	2.84816582	222.025862	912.8029819	0.291063403	513.0748531	514.7491067	666.838995	1.489097621	143.3800283	258.5015657	2.256036342	71.74009432	51.92642832	60.81463246	501.0458024	217.5112901	6.600128682	4.148652157	0.224113868	703.1468998	708.4066322	695.2488527	0.303035448	421.7389568	2649.338345	658.326863	16.22155252	19.9678217	3.979896675	50.76406454
355.992102	404.1405235	321.6069276	437.4618597	498.9276684	2.848475455	222.0196989	912.8042743	0.291041759	513.0921596	514.6938558	666.9565575	1.486890279	143.6607324	258.1618379	2.256039147	71.49481677	51.72407114	60.66976264	501.0280317	217.4833016	6.595625824	4.147888723	0.224305173	702.9975502	707.999202	695.2760577	0.30300027	422.403422	2650.893236	658.4581177	16.22425015	19.98635076	3.869468991	50.88846795
355.9898136	404.1381435	321.6019073	437.459445	498.9239831	2.848792222	222.0135307	912.8055687	0.291020138	513.1202804	514.6579424	667.0773899	1.485927591	143.843639	257.6836458	2.256035252	71.31998096	51.53356126	60.56367593	501.0083824	217.4646649	6.591513598	4.147244593	0.224509124	702.8618034	707.6303759	695.3173779	0.302974855	422.6855328	2652.828086	658.5905826	16.23649663	20.07141473	4.070351626	51.19105659
355.9875148	404.1357622	321.5968808	437.4570255	498.9202936	2.8491161	222.0073575	912.8068651	0.290998538	513.1363598	514.6348217	667.2131074	1.48674664	143.8989821	257.0790212	2.256021768	71.23654718	51.38139556	60.52351504	500.9898083	217.4575886	6.58838196	4.146827872	0.224712908	702.7586655	707.3383766	695.3756463	0.302961731	422.4076118	2655.324397	658.7289659	16.25905377	20.08895191	3.918156014	51.18250586
355.9852056	404.1333797	321.5918483	437.4546013	498.9165998	2.849447071	222.0011792	912.8081635	0.290976961	513.0970231	514.614592	667.3790339	1.489923118	143.7919081	256.3731479	2.255995701	71.24458435	51.30382892	60.58402788	500.9757535	217.4654369	6.586891987	4.146783529	0.224890746	702.7311814	707.1843069	695.4653595	0.302961458	421.184424	2658.441765	658.8778143	16.29240067	19.97773484	3.929577732	51.20321535
355.982886	404.1309959	321.5868097	437.4521724	498.9129018	2.849785114	221.994996	912.8094638	0.290955406	513.0034425	514.6051527	667.5714092	1.495497142	143.5170558	255.5671441	2.255958738	71.33571594	51.30201206	60.74333553	500.965776	217.4897264	6.586984487	4.147114451	0.225033774	702.7819962	707.1738148	695.5911016	0.30297294	419.0024661	2661.972789	659.0320753	16.33684305	19.80492468	3.981875282	51.80415936
355.9805559	404.1286109	321.5817651	437.4497387	498.9091995	2.850130209	221.9888077	912.8107662	0.290933872	512.8742957	514.589552	667.7862748	1.502943793	143.1383322	254.7405861	2.255911482	71.5305367	51.36492844	60.97729435	500.9606607	217.5254389	6.588677469	4.147734124	0.225168338	702.8759173	707.2661011	695.7148904	0.302999768	416.3631879	2666.387732	659.1982006	16.38664968	19.71087643	4.078892343	51.90261324
355.9782155	404.1262245	321.5767144	437.4473004	498.905493	2.850482337	221.9826145	912.8120706	0.290912361	512.730742	514.5815414	668.0067728	1.511710389	142.6889706	253.9082214	2.255859461	71.79422013	51.47018289	61.25393457	500.9572681	217.5721769	6.591355328	4.148537496	0.225294353	702.9990208	707.4325762	695.836311	0.303038075	413.4680199	2671.25281	659.3649777	16.43992719	19.76585918	4.067390603	51.55049895
355.9758647	404.123837	321.5716577	437.4448574	498.9017823	2.850841478	221.9764164	912.8133769	0.290890872	512.622458	514.6246597	668.195764	1.520857196	142.2036845	253.0314388	2.255814273	72.0491685	51.56580922	61.51257954	500.9474655	217.6312089	6.593536456	4.149316357	0.225405806	703.1268741	707.6177503	695.9729555	0.303078075	410.5559852	2675.39175	659.5040273	16.49690294	19.88988539	3.925082594	52.10313272
355.9735035	404.1214481	321.566595	437.4424096	498.8980674	2.851207613	221.9702132	912.8146852	0.290869405	512.5600652	514.714471	668.3446144	1.529788365	141.7381385	252.1797053	2.2557799	72.2742007	51.63930947	61.72446872	500.9307176	217.6997439	6.59492904	4.149980114	0.225508563	703.2420269	707.7926646	696.1053577	0.303118135	407.9495462	2678.763306	659.6134992	16.55239051	19.86800105	4.037381143	52.4727423
355.971132	404.119058	321.5615263	437.4399571	498.8943483	2.851580722	221.9640052	912.8159955	0.29084796	512.5092252	514.8197821	668.4688032	1.538482752	141.3292886	251.4751433	2.255754905	72.47391111	51.71871246	61.89922321	500.9122457	217.7752436	6.596180118	4.150586211	0.225596589	703.3563316	707.977944	696.2072707	0.303160265	405.7431407	2681.866893	659.7071725	16.59963066	19.98110821	4.135818039	52.5222584
355.96875	404.1166667	321.5564516	437.4375	498.890625	2.851960784	221.9577922	912.8173077	0.290826537	512.4755623	514.9295243	668.5609218	1.54617453	141.0522936	251.0209981	2.255744069	72.61777359	51.79242171	62.00262899	500.8922154	217.8536521	6.596992983	4.151029621	0.225675284	703.4520076	708.1407398	696.2516376	0.303202101	404.3241641	2684.713247	659.7855007	16.6309084	20.2303682	4.21820124	52.59874567
355.9663577	404.1142741	321.551371	437.4350382	498.8868975	2.852347781	221.9515743	912.8186219	0.290805135	512.4676254	515.0195311	668.6148614	1.551830166	141.0161467	250.9661491	2.255751946	72.68277026	51.84593859	61.99099108	500.8717488	217.9279028	6.597125706	4.151170047	0.225762656	703.4978297	708.2305373	696.1918203	0.30324282	404.2932379	2687.608446	659.8548294	16.63509189	20.4499666	4.107030599	52.11398866
355.9639549	404.1118802	321.5462844	437.4325716	498.8831658	2.852741693	221.9453516	912.819938	0.290783756	512.4786927	515.0816165	668.6325059	1.55528558	141.2322148	251.3333698	2.255777947	72.66608357	51.87909193	61.86429666	500.8518876	217.9958189	6.596685874	4.151011891	0.225858798	703.4948065	708.2472586	696.0253636	0.303281287	405.6436063	2690.606339	659.9164683	16.61069711	20.45345688	4.107750725	52.55622336
355.9615418	404.1094851	321.5411919	437.4301005	498.87943	2.853142499	221.9391239	912.8212561	0.290762399	512.5181392	515.1409428	668.6069623	1.556801891	141.6304425	251.9852354	2.255820068	72.56641829	51.87670694	61.63839695	500.8296168	218.0595048	6.595467724	4.150596694	0.225955319	703.4549137	708.2047032	695.7977916	0.303313383	407.9291311	2693.146902	659.9561799	16.56670427	20.32670009	4.066993841	52.69352071
355.9591184	404.1070888	321.5360934	437.4276246	498.87569	2.853550181	221.9328914	912.8225762	0.290741064	512.5732572	515.1965016	668.5469167	1.556801095	142.1530651	252.8436535	2.255872362	72.40984912	51.84448597	61.34587776	500.8060783	218.1186769	6.593889681	4.150027901	0.226049286	703.394466	708.1306267	695.5348961	0.303338901	410.739851	2695.264737	659.9740601	16.50910181	20.25882663	3.970940451	52.61294642
355.9566845	404.1046912	321.5309891	437.425144	498.8719458	2.853964719	221.926654	912.8238981	0.290719751	512.6087411	515.2408462	668.4760054	1.556368453	142.6873122	253.7855985	2.255922929	72.25508808	51.81006299	61.05797871	500.7849777	218.1745833	6.592995127	4.149539987	0.226131012	703.3518343	708.0928046	695.2776595	0.303360171	413.3086059	2697.229059	659.976256	16.44795237	20.28004747	4.090561991	52.4649592
355.9542403	404.1022924	321.5258788	437.4226588	498.8681975	2.854386092	221.9204118	912.825222	0.29069846	512.6208292	515.2776192	668.3972721	1.55568059	143.181655	254.7143051	2.255966827	72.11552836	51.76539742	60.79722718	500.7659289	218.2258664	6.592920347	4.149194908	0.226201225	703.3382968	708.1047984	695.0569884	0.303374813	415.2290217	2698.913899	659.959055	16.38944527	20.13215017	4.021155044	52.20513978
355.9517857	404.0998923	321.5207627	437.420169	498.8644451	2.854814281	221.9141648	912.8265479	0.290677191	512.6224662	515.2985851	668.3022949	1.55388192	143.6838289	255.646498	2.256005322	71.96720652	51.68031453	60.53671799	500.7475912	218.265953	6.593238542	4.148888557	0.226276076	703.3355295	708.125394	694.867277	0.30337822	416.6447615	2700.252928	659.9202843	16.33089233	19.97041002	4.003473505	52.03473913
355.9493208	404.0974911	321.5156407	437.4176744	498.8606885	2.855249267	221.907913	912.8278756	0.290655944	512.6103947	515.3054359	668.1949258	1.551094804	144.1373777	256.4649313	2.256032122	71.82600785	51.54161093	60.30140993	500.7294023	218.2922348	6.594074122	4.148683396	0.226360744	703.3547414	708.1650716	694.7440859	0.303367429	417.0803185	2701.147079	659.8567622	16.2793547	20.02646411	4.055543299	51.83145785
355.9468454	404.0950886	321.5105129	437.4151753	498.8569278	2.85569103	221.9016563	912.8292053	0.290634719	512.5880698	515.3111082	668.0757384	1.547546414	144.456266	256.9869609	2.256039999	71.70832766	51.32759415	60.12176783	500.7091649	218.3030257	6.59541145	4.148650949	0.226459695	703.4104508	708.2365895	694.7418631	0.30333807	415.8817482	2701.282594	659.7597975	16.24556888	19.73140232	3.897281354	51.47845608
355.9443598	404.0926848	321.5053793	437.4126714	498.853163	2.856139549	221.8953949	912.8305369	0.290613516	512.5576637	515.3144236	667.9466415	1.543194706	144.6396395	257.2000625	2.256028899	71.61522284	51.03793532	59.99831583	500.6873423	218.2976328	6.597155555	4.148777711	0.226574094	703.4993957	708.3326865	694.8565219	0.303290651	413.1100894	2700.580237	659.6321404	16.22985502	19.53958386	4.093847261	51.67774018
355.9418637	404.0902798	321.5002398	437.410163	498.8493941	2.856594806	221.8891287	912.8318704	0.290592335	512.5089178	515.3092319	667.8191926	1.538483236	144.6986983	257.1753592	2.256001429	71.55999472	50.70936078	59.93752218	500.6676764	218.2802071	6.59951903	4.149083383	0.226691073	703.6214987	708.4647941	695.0518942	0.303232326	409.1469816	2699.142353	659.4870432	16.22878236	19.43599391	4.080857754	51.77946034
355.9393573	404.0878737	321.4950945	437.4076499	498.8456211	2.857056781	221.8828578	912.8332058	0.290571175	512.4476672	515.2940374	667.6948521	1.533371873	144.6776344	256.9978041	2.25596369	71.53259474	50.3601134	59.92057532	500.6518679	218.2533639	6.602236814	4.149495981	0.22680406	703.7624833	708.6151389	695.2855292	0.303167955	404.567912	2696.882695	659.3335234	16.23712206	19.6976611	4.052755689	51.51316294
355.9368406	404.0854662	321.4899434	437.4051321	498.841844	2.857525454	221.8765821	912.8345431	0.290550038	512.3895503	515.2626175	667.5691494	1.527362053	144.6941237	256.8674554	2.255928735	71.49786978	50.0106101	59.89362775	500.6419107	218.2197026	6.604678634	4.149831846	0.226907463	703.888161	708.7354725	695.4744689	0.303104057	400.5236857	2693.720623	659.1846897	16.24204101	19.54171033	3.97064898	51.82318998
355.9343135	404.0830576	321.4847866	437.4026098	498.8380628	2.858000805	221.8703017	912.8358822	0.290528923	512.3367682	515.2162686	667.4491161	1.520800243	144.7613559	256.8323418	2.255900702	71.46271431	49.68932172	59.8542551	500.6401221	218.1839034	6.606736444	4.150065836	0.226991731	703.9912026	708.8224207	695.5816007	0.303047826	397.4860389	2689.5917	659.0522435	16.24105703	19.73828773	3.91076916	51.33642666
355.9317761	404.0806478	321.479624	437.4000828	498.8342776	2.858482814	221.8640166	912.8372233	0.290507829	512.2886973	515.167021	667.3459892	1.514505908	144.7950587	256.7593955	2.255874878	71.4632356	49.4111142	59.84024263	500.6471238	218.1501171	6.608534741	4.15028546	0.227051676	704.0847359	708.8993334	695.626269	0.303003663	395.1856505	2684.316779	658.9409517	16.2429593	19.94486019	3.967269544	51.35470107
355.9292283	404.0782367	321.4744556	437.3975512	498.8304882	2.858971462	221.8577268	912.8385663	0.290486758	512.2498967	515.120203	667.2686541	1.509038298	144.7989422	256.6869585	2.255855902	71.51284037	49.21206595	59.85266533	500.6654117	218.1251724	6.609934951	4.150469549	0.227075355	704.1613018	708.9653594	695.5666835	0.302981126	394.1610175	2677.79579	658.8648437	16.24604788	19.99756188	4.010502844	51.48542557
355.9266701	404.0758245	321.4692815	437.395015	498.8266949	2.85946673	221.8514323	912.8399111	0.290465709	512.2213577	515.0814459	667.2304441	1.505245805	144.7741258	256.6749525	2.255849356	71.63339321	49.14493926	59.89751215	500.6987139	218.1186426	6.610908126	4.15061449	0.227044744	704.2151196	709.0285543	695.3487771	0.302993209	395.0771725	2669.978962	658.8426023	16.24785316	19.9732847	3.851674065	51.29450982
355.9241017	404.073411	321.4641017	437.3924741	498.8228975	2.859968597	221.8451331	912.8412578	0.290444681	512.2021163	515.0527779	667.2308032	1.503398911	144.7108696	256.7083412	2.255854914	71.82704492	49.21121548	59.98076547	500.7463337	218.1312382	6.611462297	4.150731191	0.22696155	704.240968	709.0866468	694.9770036	0.303040793	397.875201	2660.961192	658.8722921	16.24937724	19.97723463	3.951350914	51.35301091
355.9215228	404.0709963	321.4589162	437.3899287	498.819096	2.860477044	221.8388293	912.8426064	0.290423675	512.1911927	515.0254789	667.252056	1.502890157	144.6575372	256.8270891	2.25587274	72.05561632	49.37147152	60.08004299	500.8042612	218.1554545	6.611482586	4.150766283	0.226843966	704.2192185	709.1083956	694.4741872	0.303114817	402.2993899	2651.078721	658.9359888	16.24704477	20.03203515	3.979001111	51.35643012
355.9189337	404.0685804	321.453725	437.3873787	498.8152905	2.86099205	221.8325208	912.8439568	0.290402692	512.1814001	514.995618	667.2821212	1.503586721	144.6062898	256.9883606	2.25589831	72.30370748	49.59024117	60.20017537	500.8684497	218.1850932	6.611119599	4.150749372	0.226708725	704.1435736	709.0856398	693.8878348	0.303206771	407.7332913	2640.68756	659.0146407	16.24290862	20.09121338	3.967102423	51.60191632
355.9163342	404.0661633	321.4485281	437.384824	498.811481	2.861513597	221.8262077	912.8453091	0.29038173	512.1596651	514.9592787	667.303616	1.505276833	144.5082916	257.0527864	2.255920346	72.5574551	49.80190862	60.36303419	500.9320666	218.2089838	6.610732141	4.15077276	0.226584243	704.0166004	709.0185238	693.3182008	0.303300659	412.8687559	2630.263497	659.0752874	16.24458165	20.1432701	3.957314586	51.46334806
355.9137244	404.063745	321.4433256	437.3822648	498.8076675	2.862041665	221.81989	912.8466633	0.29036079	512.1209026	514.911975	667.2996661	1.507747125	144.3845289	257.029736	2.255937169	72.78959539	49.97134313	60.56020541	500.9904921	218.2213536	6.610385498	4.150831818	0.226487704	703.8231008	708.8892964	692.8015265	0.30338825	417.2547232	2620.25357	659.0969838	16.2508381	20.23734068	4.064595464	51.68044504
355.9111042	404.0613256	321.4381174	437.379701	498.8038499	2.862576234	221.8135676	912.8480193	0.290339872	512.0661665	514.8550775	667.262766	1.511315028	144.2818161	257.0246142	2.255954876	72.98406306	50.11198228	60.77415463	501.0426136	218.2257266	6.609989023	4.150880043	0.226417827	703.5405668	708.6821527	692.3113083	0.303473389	421.2515456	2610.980959	659.0768679	16.25552009	20.26920893	4.048887823	51.61686781
355.9084737	404.0589049	321.4329036	437.3771326	498.8000284	2.863117284	221.8072407	912.8493771	0.290318976	511.9892317	514.7838659	667.170908	1.515745253	144.2313203	257.0646516	2.255972165	73.10582341	50.18260353	60.99204588	501.0826057	218.2156958	6.609638038	4.150909871	0.226394664	703.149591	708.3764223	691.889603	0.303546308	424.3394843	2603.02902	658.9883812	16.25625899	20.25345285	4.013091391	51.79984108
355.9058329	404.056483	321.4276841	437.3745597	498.7962029	2.863664796	221.8009092	912.8507368	0.290298102	511.8835913	514.6897661	666.9937001	1.520478607	144.2910596	257.2083093	2.255988326	73.10168369	50.12550933	61.18820097	501.1029898	218.1818011	6.609390224	4.150887256	0.22644499	702.623459	707.9395527	691.5860283	0.303593199	425.9198132	2597.122844	658.7970472	16.24833877	20.30415951	4.128830739	51.44228406
355.9031818	404.05406	321.4224591	437.3719821	498.7923734	2.864218749	221.7945732	912.8520983	0.290277249	511.7527842	514.575373	666.7354607	1.525406129	144.4687372	257.4703357	2.256003796	72.96776042	49.94650393	61.3525401	501.1037728	218.1253234	6.609219084	4.150804678	0.226565889	701.9737658	707.3823911	691.4027617	0.303613349	426.0140783	2593.447937	658.5087403	16.23087854	20.2652239	3.949686882	51.82929591
355.9005203	404.0516357	321.4172285	437.3694	498.7885399	2.864779125	221.7882326	912.8534616	0.290256419	511.6063029	514.4502565	666.428631	1.530447295	144.7053129	257.7563356	2.256014636	72.74038671	49.67990849	61.49540223	501.0899246	218.0515876	6.609125591	4.150709552	0.226737751	701.2571066	706.7589259	691.339942	0.303610177	424.6821593	2591.754131	658.1570497	16.21011792	20.21606219	4.008352231	52.23361462
355.8978486	404.0492103	321.4119922	437.3668134	498.7847024	2.865345903	221.7818874	912.8548268	0.290235611	511.4582443	514.3244882	666.106048	1.535517896	144.9780944	258.0509186	2.256021987	72.44882014	49.37665499	61.61048663	501.0675269	217.9690265	6.608962064	4.150599701	0.226934419	700.5224112	706.1158929	691.3649597	0.303591097	422.4289178	2591.786717	657.7820196	16.18761201	20.14963674	3.918840165	52.14198169
355.8951665	404.0467837	321.4067505	437.3642221	498.780861	2.865919063	221.7755378	912.8561938	0.290214824	511.3323297	514.2154118	665.8231504	1.540791385	145.2557819	258.3602829	2.256030929	72.14907596	49.13838772	61.69043638	501.0482102	217.8947686	6.608423137	4.150456581	0.22710663	699.8385393	705.5228239	691.3939051	0.303574313	420.4422427	2592.930547	657.4538776	16.16438088	20.13953476	4.027091555	51.86764632
355.8924741	404.0443559	321.4015032	437.3616264	498.7770157	2.866498587	221.7691836	912.8575626	0.290194059	511.2423411	514.1326977	665.6140609	1.545916071	145.5066824	258.6421819	2.256040053	71.86906689	49.00622065	61.72841381	501.0376406	217.8352552	6.60743071	4.150294885	0.227229938	699.2679526	705.037176	691.4136247	0.303563335	418.9945334	2594.978696	657.2119295	16.14338401	20.15140135	3.924663177	51.74966872
355.8897713	404.041927	321.3962503	437.359026	498.7731664	2.867084455	221.762825	912.8589332	0.290173316	511.1912385	514.0757684	665.4801755	1.550006799	145.7386449	258.8786157	2.256045029	71.58969552	48.95500198	61.70393364	501.0338591	217.7857229	6.606074747	4.150123404	0.227309168	698.8457718	704.6845127	691.4713046	0.303546681	417.5802615	2598.313733	657.0553935	16.12500864	20.28738156	3.968509218	51.89150248
355.8870583	404.0394969	321.390992	437.3564212	498.7693131	2.867676645	221.7564618	912.8603056	0.290152595	511.1958601	514.0554202	665.4626372	1.552471317	145.916332	259.0200967	2.25604376	71.34234844	49.0308722	61.60575265	501.043744	217.7531057	6.604273562	4.149958768	0.227314789	698.6518291	704.5369188	691.5545993	0.30352714	416.4905128	2602.67523	657.0316497	16.11261144	20.36078649	3.926381005	51.05287759
355.884335	404.0370656	321.3857281	437.3538117	498.765456	2.86827514	221.7500942	912.8616798	0.290131896	511.27616	514.0851187	665.6151193	1.552607049	145.979164	258.9741591	2.256032128	71.17353624	49.2907697	61.42803743	501.0763399	217.7456888	6.601960497	4.149838854	0.227209713	698.7893167	704.6878229	691.6524428	0.303508284	416.0160986	2607.631915	657.200673	16.11225164	20.37444566	3.989618488	51.39368183
355.8816013	404.0346331	321.3804588	437.3511978	498.7615949	2.868879919	221.7437222	912.8630557	0.290111219	511.4302866	514.1621411	665.9324728	1.550277123	145.9246982	258.7364901	2.256009826	71.08709984	49.72363559	61.17598905	501.130242	217.7625187	6.599208486	4.149767772	0.22699634	699.2603753	705.1353679	691.7694445	0.303488683	416.0800079	2613.058266	657.5559836	16.1241961	20.41572249	4.091549137	51.52011212
355.8788574	404.0321995	321.375184	437.3485793	498.7577299	2.869490963	221.7373457	912.8644335	0.290090563	511.6420157	514.2744779	666.3738264	1.546279397	145.7789799	258.3712916	2.255982355	71.07905619	50.29690962	60.87693618	501.1990423	217.801289	6.596117838	4.149721265	0.226695668	699.985777	705.8049092	691.8825199	0.303472619	416.7914255	2618.675135	658.0528433	16.14489294	20.39088016	3.937446371	51.51580394
355.8761032	404.0297647	321.3699037	437.3459563	498.753861	2.870108252	221.7309648	912.8658131	0.290069929	511.8895583	514.4054999	666.8864361	1.541104284	145.5689818	257.9197616	2.255951876	71.13067404	50.94513472	60.55855897	501.2731553	217.8538958	6.592917566	4.14969199	0.226341727	700.8829244	706.6150506	692.0053262	0.303456493	417.7809458	2624.393029	658.62956	16.17167636	20.40333287	3.982584307	51.39584276
355.8733386	404.0273287	321.3646179	437.3433288	498.7499883	2.870731765	221.7245795	912.8671944	0.290049318	512.1333095	514.525278	667.3722313	1.535442525	145.3577538	257.4623923	2.25592081	71.18744859	51.53855262	60.25724817	501.3342795	217.9026794	6.590011375	4.14966351	0.226002271	701.8014028	707.418449	692.1847129	0.303428724	418.137609	2630.42875	659.1708071	16.19883203	20.42379464	3.905052505	51.32517128
355.8705638	404.0248916	321.3593268	437.3406967	498.7461116	2.871361485	221.7181897	912.8685775	0.290028728	512.3517489	514.6168476	667.7817015	1.529947352	145.1631431	257.0387191	2.255892694	71.24570943	52.02339815	60.01030558	501.3743258	217.9417824	6.587608781	4.149627263	0.225705558	702.6568923	708.1320349	692.4128297	0.303390256	417.7325344	2636.367127	659.619506	16.22404819	20.39923678	3.875464072	51.34426362
355.8677786	404.0224533	321.3540302	437.3380602	498.7422311	2.871997389	221.7117956	912.8699624	0.290008159	512.5454269	514.6783107	668.1243624	1.524731515	144.9469889	256.6120734	2.255868656	71.35049345	52.41908544	59.84668758	501.3963669	217.9756446	6.585758585	4.149599518	0.225437215	703.4635584	708.7645531	692.6512041	0.303349404	416.9773771	2641.287613	659.9866079	16.25033406	20.42696333	3.834979805	51.17538506
355.8649832	404.0200139	321.3487283	437.3354191	498.7383466	2.87263946	221.7053972	912.871349	0.289987613	512.6873814	514.6882105	668.3405901	1.520637676	144.725113	256.2227906	2.255853001	71.50278275	52.66193731	59.81709482	501.3911129	217.9972818	6.584719401	4.149573041	0.225230516	704.1170497	709.2130514	692.8849492	0.30330852	415.7635287	2644.5439	660.2031475	16.27541972	20.51851181	3.963366554	51.43583231
355.8621775	404.0175733	321.3434209	437.3327736	498.7344584	2.873287678	221.6989943	912.8727374	0.289967089	512.7436001	514.6201215	668.3548736	1.518924488	144.5214564	255.9347484	2.255852467	71.70403124	52.67822423	59.98600585	501.347239	217.9990126	6.584774765	4.149531147	0.225126581	704.4767925	709.3414223	693.0848146	0.30327293	414.0777778	2645.317906	660.1828389	16.29571935	20.53735908	4.017586352	51.49488463
355.8593615	404.0151316	321.3381082	437.3301235	498.7305662	2.873942022	221.6925872	912.8741276	0.289946586	512.7118913	514.4732676	668.1674621	1.519683223	144.3355342	255.7501878	2.255867057	71.9559597	52.46967045	60.35240626	501.2666017	217.9818611	6.585924184	4.14947619	0.225127084	704.5338086	709.1471188	693.2428967	0.303244761	412.020211	2643.423717	659.9269293	16.31112554	20.55610809	3.985988628	51.47456079
355.8565352	404.0126887	321.3327901	437.3274689	498.7266703	2.874602473	221.6861757	912.8755195	0.289926105	512.6056277	514.2615951	667.8117506	1.522261325	144.1829024	255.6652439	2.255891851	72.2254196	52.0613405	60.85596103	501.156429	217.9482454	6.587994213	4.149411537	0.225225238	704.3374342	708.6936938	693.3931977	0.303218038	409.4316861	2639.655364	659.4752055	16.32113343	20.51809994	3.928534685	51.63121653
355.8536987	404.0102447	321.3274666	437.3248099	498.7227705	2.875269011	221.6797599	912.8769131	0.289905646	512.4472352	514.0054968	667.3465295	1.525993213	144.0550873	255.6534973	2.255922438	72.50595634	51.51789998	61.43715408	501.029535	217.9066654	6.590708244	4.149345036	0.225393877	703.9701004	708.0773485	693.5403201	0.303193505	406.5696294	2634.447963	658.8979212	16.3271486	20.53188745	3.97981418	51.44551916
355.8508518	404.0077995	321.3221379	437.3221464	498.7188668	2.875941617	221.6733398	912.8783085	0.289885209	512.2855344	513.7461728	666.895486	1.529462304	143.9140546	255.6370266	2.255950513	72.80726722	50.97820931	61.99385063	500.9107568	217.8751654	6.593535162	4.149298259	0.225567557	703.6194534	707.5007834	693.6837628	0.303174148	404.0340568	2628.438751	658.3411738	16.33390141	20.61355198	3.949253764	51.35526064
355.8479947	404.0053532	321.3168038	437.3194784	498.7149594	2.876620271	221.6669154	912.8797056	0.289864793	512.136565	513.5007134	666.503659	1.532199034	143.7680291	255.6088978	2.2559718	73.10506938	50.48960283	62.46394082	500.8111764	217.8595493	6.59621391	4.149273644	0.225731927	703.3370783	707.0358402	693.8372878	0.303159008	401.9415636	2622.24404	657.8595559	16.34134082	20.64111843	3.958375785	51.60738536
355.8451273	404.0029058	321.3114644	437.3168059	498.7110481	2.877304952	221.6604867	912.8811045	0.289844399	511.9802163	513.2581911	666.1326036	1.534983389	143.6561512	255.6270463	2.255988216	73.36491738	50.01189998	62.85032859	500.7278819	217.8548841	6.598789912	4.149256039	0.225920195	703.025815	706.6074888	694.0014433	0.303148876	400.1758777	2615.923523	657.4108166	16.3454937	20.62499706	4.076111919	51.35663047
355.8422497	404.0004572	321.3061197	437.3141289	498.7071331	2.877995643	221.6540538	912.882505	0.289824027	511.8344809	513.0389759	665.8343483	1.537368038	143.5930173	255.6894979	2.255994853	73.55248472	49.60127559	63.07690469	500.6742141	217.8678366	6.600928771	4.149245406	0.226117736	702.7378017	706.2952616	694.1924406	0.303142914	398.8777734	2610.287208	657.0584035	16.34583848	20.69749895	4.003258993	51.67308384
355.8393617	403.9980076	321.3007698	437.3114475	498.7032142	2.878692322	221.6476166	912.8839073	0.289803677	511.7229656	512.8695609	665.6738897	1.538676841	143.6027653	255.7958343	2.255984873	73.61580255	49.32391818	63.04135196	500.6660598	217.9056524	6.60220855	4.14924056	0.226308037	702.542868	706.2023801	694.44291	0.303137358	398.0935235	2606.582017	656.8811389	16.34140434	20.68568917	3.97827835	51.84631546
355.8364635	403.9955567	321.2954146	437.3087617	498.6992915	2.87939497	221.6411752	912.8853113	0.289783349	511.645687	512.7511102	665.6500313	1.53897927	143.6939332	255.9471922	2.255958886	73.54751984	49.18118439	62.74360112	500.7027949	217.967415	6.602583501	4.1492372	0.226490114	702.4326864	706.3214493	694.747119	0.303132417	397.8299049	2604.964028	656.8779754	16.33180398	20.53386551	3.881346777	51.83376434
355.833555	403.9931048	321.2900542	437.3060713	498.6953651	2.880103567	221.6347296	912.886717	0.289763042	511.6055198	512.6800772	665.7559392	1.538187795	143.8383075	256.099563	2.255920511	73.39085234	49.17329223	62.23821591	500.777266	218.0516709	6.602154277	4.149239833	0.226643889	702.4283629	706.6405284	695.0708918	0.303130838	398.2145584	2604.945254	657.0382185	16.32000246	20.23521927	4.097381171	52.33201501
355.8306363	403.9906517	321.2846885	437.3033765	498.6914349	2.880818095	221.6282797	912.8881244	0.289742757	511.5883337	512.6405979	665.9440106	1.536736101	144.032118	256.2454	2.25587555	73.17075819	49.25374677	61.60094806	500.875135	218.1505519	6.601152557	4.149242513	0.226775636	702.478946	707.0784901	695.386543	0.303133498	399.1287079	2606.049175	657.3037207	16.30647051	20.20259324	4.026532346	52.11405758
355.8277073	403.9881975	321.2793176	437.3006773	498.687501	2.881538532	221.6218257	912.8895335	0.289722494	511.5543454	512.59282	666.0985087	1.535840441	144.2767253	256.400157	2.255835888	72.9293695	49.30444901	60.98653766	500.9667759	218.2467981	6.600138027	4.149231082	0.226918058	702.4394983	707.4404929	695.6470311	0.303142334	400.2586887	2607.116732	657.535099	16.2905332	20.14471337	4.207377044	52.06769125
355.8247681	403.9857422	321.2739415	437.2979736	498.6835632	2.882264859	221.6153675	912.8909443	0.289702253	511.5019606	512.5303719	666.1976664	1.535578724	144.559117	256.532842	2.255806092	72.69581019	49.30859036	60.45542331	501.0409852	218.3354609	6.599226047	4.149202132	0.227059491	702.3065827	707.6882464	695.8247212	0.303157829	401.5644982	2607.928051	657.7038452	16.27399008	19.87036939	4.010297212	52.23256087
355.8218186	403.9832858	321.2685603	437.2952655	498.6796218	2.882997057	221.6089052	912.8923567	0.289682033	511.4606931	512.4780729	666.3019014	1.535144968	144.8756349	256.5974338	2.255782975	72.45897065	49.33521563	59.95864145	501.1052005	218.4219244	6.598070404	4.149155536	0.227160872	702.1807219	707.9175904	695.9249568	0.303177399	403.1485369	2609.473683	657.8799039	16.25885665	19.96203142	3.943689623	51.98047556
355.8188588	403.9808282	321.2631738	437.292553	498.6756766	2.883735106	221.6024387	912.8937709	0.289661835	511.4325027	512.4310878	666.3915104	1.534518072	145.2094304	256.550717	2.255771674	72.25310763	49.37095007	59.56430786	501.1461441	218.5006248	6.596777015	4.149086792	0.227203484	702.0721661	708.0940894	695.9178604	0.303200717	404.9430428	2611.641533	658.0361427	16.24755373	19.99358427	3.815359997	51.74310204
355.8158888	403.9783696	321.2577822	437.289836	498.6717276	2.884478986	221.5959681	912.8951867	0.289641659	511.4229065	512.3844211	666.4480331	1.533547871	145.5285405	256.3270404	2.255778467	72.13241815	49.40601368	59.36092971	501.147748	218.5658585	6.595489098	4.148994273	0.227157629	702.0113431	708.1874068	695.7630805	0.303227947	406.9170922	2614.162416	658.1453653	16.24401005	19.96249105	4.018764102	52.19676325
355.8129085	403.9759098	321.2523855	437.2871146	498.667775	2.885228677	221.5894933	912.8966042	0.289621504	511.4363161	512.3404585	666.4794406	1.532160943	145.8225589	255.9229945	2.255802453	72.1030173	49.4505543	59.3486517	501.1112518	218.6174086	6.59421068	4.14888272	0.227019581	702.0170403	708.2108562	695.4648236	0.303257921	409.0332562	2617.15054	658.2160692	16.24877375	19.85081504	4.006761395	51.88109119
355.809918	403.9734489	321.2469836	437.2843888	498.6638186	2.88598416	221.5830144	912.8980234	0.289601372	511.4541778	512.2866295	666.4617377	1.530978881	146.0938835	255.4072353	2.255841044	72.15355208	49.47359036	59.51866608	501.0417956	218.6531199	6.593144648	4.148761673	0.226830764	702.0246951	708.1267523	695.0489584	0.303290167	411.1383615	2620.231122	658.2222941	16.25898113	19.66258722	3.865436265	52.04346699
355.8069173	403.9709869	321.2415766	437.2816586	498.6598585	2.886745416	221.5765315	912.8994443	0.289581261	511.4784367	512.2281546	666.4206747	1.53002004	146.336752	254.8243898	2.255887747	72.26599075	49.49777234	59.8125752	500.9541103	218.6772226	6.592261607	4.148646299	0.226609213	702.0458618	707.9806066	694.5529313	0.303323162	413.2095106	2623.552132	658.196642	16.27307569	19.62860022	3.915906857	51.59755299
355.8039063	403.9685239	321.2361646	437.2789239	498.6558948	2.887512423	221.5700444	912.9008668	0.289561171	511.5230133	512.1859457	666.4301522	1.528977046	146.5532157	254.2439339	2.255929009	72.38832615	49.59220311	60.08461137	500.8801831	218.7016011	6.591301609	4.148559857	0.226375043	702.1323197	707.8982369	694.049523	0.303354053	415.3102042	2627.804358	658.2313701	16.28817007	19.719366	3.884438243	51.20986469
355.800885	403.9660597	321.2307474	437.2761849	498.6519273	2.888285164	221.5635533	912.9022909	0.289541104	511.5801639	512.1549169	666.490648	1.528133425	146.7299474	253.7205142	2.255959986	72.51679352	49.75153964	60.30888157	500.8295512	218.7270795	6.590414343	4.148519562	0.226158034	702.267266	707.8869795	693.5742399	0.303381176	417.3143652	2632.767273	658.3284657	16.30258739	19.82804046	4.035863476	50.95763052
355.7978535	403.9635944	321.2253252	437.2734415	498.6479561	2.889063617	221.5570582	912.9037167	0.289521058	511.637161	512.1163969	666.5597371	1.52786497	146.8302218	253.2559923	2.255983862	72.70052915	49.93158445	60.56565446	500.7909928	218.7464025	6.5899961	4.148536494	0.225970907	702.4264307	707.8858036	693.1208337	0.303403311	418.9947702	2637.702795	658.4342415	16.31774584	19.77205601	3.96659345	51.32944562
355.7948118	403.961128	321.2198979	437.2706936	498.6439813	2.889847764	221.550559	912.9051441	0.289501034	511.6828586	512.0616593	666.6329598	1.528536334	146.8325755	252.9169068	2.255995015	72.94179295	50.11950026	60.83205128	500.7748621	218.7600978	6.590285401	4.148633493	0.225851795	702.5878242	707.898172	692.7332054	0.303418298	420.1731622	2642.210444	658.5447593	16.33180768	19.6386686	3.972938142	51.60055562
355.7917599	403.9586606	321.2144656	437.2679414	498.6400028	2.890637584	221.5440558	912.9065732	0.289481031	511.6958646	511.9743766	666.690409	1.530807924	146.716198	252.8002745	2.255987098	73.24047339	50.28249943	61.08629103	500.7926873	218.7676071	6.591641472	4.148837449	0.225858852	702.6957741	707.9047422	692.4657634	0.303424034	420.6022383	2645.611406	658.6388881	16.34164954	19.49612188	4.051771154	52.48657482
355.7886977	403.956192	321.2090282	437.2651848	498.6360207	2.891433058	221.5375485	912.9080039	0.28946105	511.6719796	511.8511821	666.724242	1.534662517	146.4772742	252.9111856	2.255960933	73.59520449	50.40957145	61.33288093	500.8425344	218.7679615	6.594097585	4.14914545	0.225993669	702.7421705	707.8952782	692.3250004	0.303420412	420.2194089	2647.686683	658.70609	16.34720415	19.24106281	4.004971939	51.78904888
355.7856253	403.9537224	321.2035858	437.2624238	498.6320349	2.892234166	221.5310373	912.9094362	0.289441091	511.6267781	511.7107283	666.7678788	1.539347814	146.1461016	253.2023425	2.255918834	73.96478763	50.53708937	61.52651248	500.9237437	218.7655395	6.597190685	4.1495288	0.226214563	702.7689904	707.9155794	692.3002686	0.303409088	419.2152341	2649.007913	658.7844902	16.34915897	19.23977244	4.102041205	51.77103318
355.7825427	403.9512517	321.1981385	437.2596584	498.6280455	2.893040888	221.5245221	912.9108702	0.289421154	511.5642931	511.5578072	666.8159401	1.544401539	145.744181	253.6186003	2.255867691	74.33356636	50.66141371	61.68459767	501.0237384	218.7589798	6.600677477	4.149955638	0.226484886	702.7830467	707.9498271	692.3626489	0.303392256	417.6739473	2649.644099	658.8643913	16.34888882	19.20919573	3.893995916	51.6579258
355.7794498	403.9487799	321.1926861	437.2568887	498.6240524	2.893853206	221.5180029	912.9123058	0.289401238	511.4918799	511.3966637	666.8456031	1.549122262	145.299924	254.0417762	2.255821952	74.699815	50.76685771	61.88051023	501.1137287	218.7429803	6.604240503	4.150372333	0.226735369	702.7970988	707.947608	692.4406302	0.303373805	415.7325432	2649.646134	658.9119999	16.35006866	19.20879528	3.868068312	51.64024514
355.7763468	403.946307	321.1872288	437.2541146	498.6200557	2.894671098	221.5114798	912.913743	0.289381344	511.4143128	511.2362966	666.8640343	1.55293482	144.8448517	254.4298985	2.255786629	75.02754651	50.85923753	62.09574119	501.1867294	218.7192168	6.607534284	4.150745074	0.226931884	702.8194044	707.9143651	692.5184501	0.30335629	413.5228288	2649.158686	658.9337107	16.35312708	19.12787183	3.864090791	51.52857751
355.7732335	403.9438331	321.1817665	437.2513361	498.6160554	2.895494546	221.5049527	912.9151818	0.289361471	511.3216962	511.0765742	666.8780404	1.5557879	144.3960873	254.8358025	2.255758265	75.27211606	50.93250411	62.26226234	501.252892	218.6921797	6.610467272	4.151069505	0.22709487	702.8214851	707.8673367	692.636977	0.303340378	411.0298896	2647.914529	658.9395617	16.35519959	19.22950675	4.073859798	51.80886554
355.77011	403.941358	321.1762993	437.2485532	498.6120515	2.896323529	221.4984217	912.9166222	0.289341621	511.2177896	510.9279489	666.8953735	1.557000507	143.9970231	255.2148481	2.255742741	75.38368137	50.99098127	62.34993383	501.304694	218.6645647	6.612608788	4.151303281	0.227186186	702.8054918	707.8120694	692.7794424	0.303329619	408.4306522	2646.039444	658.9368438	16.35633662	19.22969916	3.997952508	51.4960297
355.7669762	403.9388819	321.1708271	437.2457661	498.608044	2.897158029	221.4918868	912.9180641	0.289321791	511.1128634	510.8094626	666.9394656	1.555588378	143.7085652	255.5044693	2.255746618	75.29132901	51.05576328	62.30351878	501.3353942	218.6416054	6.613313438	4.151391667	0.22715143	702.7884573	707.7754221	692.923708	0.303328625	406.0136501	2643.933526	658.9515784	16.35660586	18.96887944	3.917202674	51.94416971
355.7638323	403.9364048	321.1653501	437.2429745	498.6040329	2.897998025	221.485348	912.9195077	0.289301984	511.0073303	510.7224189	667.0140785	1.551503784	143.5395627	255.7098882	2.255769329	74.99090915	51.12526231	62.11360179	501.345717	218.6242863	6.612551777	4.15133261	0.22699342	702.7716306	707.7657732	693.0741106	0.303338347	403.8666832	2641.641007	658.9894215	16.35543081	19.00142917	3.895332581	52.00461968
355.7606781	403.9339265	321.1598681	437.2401786	498.6000182	2.898843497	221.4788053	912.9209529	0.289282198	510.9027118	510.6574955	667.1046745	1.545250038	143.4590992	255.835528	2.255809216	74.5502816	51.1846029	61.85043867	501.3317078	218.6075493	6.610716395	4.151155101	0.226732703	702.7674516	707.76619	693.2201904	0.303357599	402.0000731	2639.171857	659.0346042	16.35389719	18.70850951	3.938143882	52.03823921
355.7575138	403.9314472	321.1543813	437.2373784	498.5959999	2.899694426	221.4722587	912.9223997	0.289262434	510.7987485	510.6076145	667.211811	1.537403654	143.4392401	255.9264348	2.255859703	74.01922392	51.22894306	61.53601981	501.3007878	218.590093	6.608187132	4.150898318	0.226409005	702.7843206	707.7882679	693.3802385	0.303384718	400.4344319	2636.569875	659.0919152	16.35130459	18.53151831	3.961031095	52.12146877
355.7543392	403.9289669	321.1488896	437.2345739	498.5919781	2.900550792	221.4657083	912.923848	0.289242691	510.6885606	510.5563207	667.3344182	1.52917705	143.4201725	256.0954667	2.255906447	73.47942435	51.24713339	61.19088287	501.27253	218.5703465	6.605725288	4.150642011	0.226109999	702.8205527	707.8519083	693.6072531	0.303415333	399.0725598	2633.70118	659.1677868	16.34548353	18.80008403	3.84234296	51.70083794
355.7511545	403.9264854	321.143393	437.231765	498.5879527	2.901412576	221.459154	912.9252979	0.28922297	510.5764568	510.4989213	667.4724312	1.521058414	143.381578	256.3605519	2.255945152	72.98793141	51.2361742	60.85589835	501.2491529	218.5461396	6.603657347	4.150418526	0.225862443	702.8937403	707.9641735	693.8988578	0.303448872	398.0331571	2630.775964	659.2661621	16.33653879	18.91267052	3.90647305	51.97554437
355.7479595	403.9240029	321.1378916	437.2289518	498.5839238	2.902279758	221.4525959	912.9267494	0.289203271	510.4766106	510.4474711	667.6391311	1.512615057	143.3603475	256.6595386	2.255980344	72.54111718	51.20957268	60.54282795	501.2213509	218.5184832	6.601698474	4.150203476	0.225631872	703.0338551	708.1389613	694.2133411	0.30348932	397.6873232	2628.366594	659.4039823	16.32551168	19.02128524	3.835421603	51.60494232
355.7447544	403.9215194	321.1323854	437.2261342	498.5798913	2.903152317	221.4460339	912.9282024	0.289183593	510.396845	510.3984109	667.8376577	1.50440607	143.3363378	257.0056663	2.256007141	72.2083274	51.16848427	60.30208497	501.1913327	218.4850223	6.600206185	4.150034447	0.225446327	703.2670423	708.3880589	694.5406132	0.303536406	398.2306666	2626.846641	659.5902554	16.31269206	18.98226798	4.068791938	51.89175399
355.741539	403.9190348	321.1268744	437.2233124	498.5758553	2.904030235	221.4394682	912.929657	0.289163937	510.3472088	510.3452074	668.0660757	1.497201282	143.2763199	257.4074531	2.256020269	72.08926976	51.11147087	60.21715635	501.1592191	218.441142	6.599690624	4.149961206	0.22533918	703.6275801	708.7159051	694.8604329	0.303589321	399.8698714	2626.659704	659.8285322	16.29909366	19.38752421	4.146454709	51.44874338
355.7383135	403.9165492	321.1213585	437.2204862	498.5718157	2.904913492	221.4328987	912.9311131	0.289144303	510.3309626	510.2882088	668.3212433	1.49113734	143.1836245	257.8469267	2.25602005	72.18516475	51.04241291	60.29340088	501.1243696	218.387832	6.600138876	4.149982558	0.225309038	704.1110925	709.1167279	695.1609899	0.303647265	402.6006289	2627.858043	660.1160847	16.28531501	19.26789557	4.065721031	51.36230023
355.7350777	403.9140625	321.1158379	437.2176557	498.5677726	2.905802067	221.4263254	912.9325708	0.28912469	510.3379338	510.2225429	668.5887408	1.486403941	143.056268	258.334992	2.256006078	72.44371819	50.95942878	60.48096754	501.0935867	218.3293742	6.601459398	4.150087697	0.225363585	704.6655931	709.5685548	695.4653492	0.303706005	406.0203455	2629.85182	660.4340471	16.27099545	19.25428451	3.983838117	51.61119874
355.7318318	403.9115748	321.1103125	437.214821	498.5637261	2.906695942	221.4197483	912.93403	0.289105099	510.3642561	510.1497731	668.8548979	1.482829324	142.9138228	258.8312823	2.255983184	72.79934708	50.86615383	60.74032637	501.0647756	218.2699019	6.603327558	4.150241035	0.225478465	705.2485757	710.0425402	695.7658661	0.303763255	409.8432205	2632.251159	660.7627237	16.25697934	19.42322155	3.879410446	51.67322196
355.7285757	403.909086	321.1047824	437.2119819	498.559676	2.907595097	221.4131675	912.9354908	0.289085529	510.4052571	510.0794226	669.1045719	1.4796183	142.8116694	259.2463991	2.255963162	73.11563857	50.77210909	60.9899376	501.0295362	218.2168613	6.604945581	4.150358905	0.225587133	705.7977345	710.4971678	696.0411492	0.303817859	413.7088359	2634.518744	661.0763216	16.24463951	19.2787211	3.894996763	51.36246313
355.7253094	403.9065962	321.0992475	437.2091385	498.5556224	2.908499511	221.4065829	912.9369531	0.289065981	510.4550639	510.0082687	669.3192098	1.476950152	142.7509018	259.5578482	2.255948122	73.34167419	50.68084836	61.19650669	500.9902398	218.1740756	6.606158179	4.150422931	0.225682735	706.2625782	710.8985605	696.2918227	0.303865241	417.2031135	2636.158566	661.350241	16.23483182	19.22887146	3.845968807	51.48598146
355.7220329	403.9041054	321.0937079	437.2062909	498.5515653	2.909409165	221.3999946	912.9384169	0.289046454	510.5145023	509.9248988	669.482092	1.475830913	142.6883367	259.7800248	2.255932582	73.52920661	50.5947372	61.40085318	500.9539608	218.1404042	6.607400847	4.15047534	0.225803115	706.6275315	711.225197	696.5152285	0.303899509	420.0656703	2637.058048	661.5678886	16.22870772	19.15108163	3.938296926	51.16950136
355.7187462	403.9016135	321.0881636	437.203439	498.5475048	2.91032404	221.3934027	912.9398823	0.289026949	510.5762511	509.8238982	669.5684536	1.476585293	142.6176397	259.8873893	2.25591863	73.62315766	50.51887132	61.56918755	500.9242299	218.1199404	6.608540335	4.150499158	0.225943153	706.8302073	711.4321307	696.7116558	0.303914276	421.7416512	2636.593239	661.6966272	16.22754362	19.16779601	3.964554286	51.47312099
355.7154494	403.8991206	321.0826146	437.2005827	498.5434408	2.911244116	221.386807	912.9413492	0.289007466	510.6275611	509.6967413	669.546811	1.479642521	142.5258081	259.8650871	2.255907845	73.54975056	50.45691265	61.64905963	500.9080086	218.1179556	6.609440989	4.150476263	0.226103121	706.7866001	711.4641312	696.8943254	0.303901047	421.4707041	2633.857394	661.6946734	16.23246079	19.39876556	3.867905615	51.47204102
355.7121424	403.8966266	321.0770609	437.1977223	498.5393733	2.912169373	221.3802076	912.9428175	0.288988004	510.6666854	509.5454139	669.4155733	1.485053488	142.4073888	259.7195447	2.255899889	73.31786459	50.41048696	61.64633282	500.9067184	218.1332799	6.610152306	4.150413095	0.22628338	706.4956958	711.3187708	697.0643476	0.303859924	419.2286864	2628.858615	661.5587194	16.2434306	19.59674903	3.889506769	51.44797094
355.7088252	403.8941317	321.0715026	437.1948575	498.5353024	2.913099791	221.3736046	912.9442874	0.288968564	510.6974781	509.3883577	669.2015444	1.491892107	142.2951405	259.4540413	2.255897936	72.94541541	50.37988665	61.57171724	500.9130907	218.1616815	6.610489534	4.150297694	0.226452339	706.0140232	711.0372504	697.2143795	0.303800545	415.60685	2622.231402	661.3176644	16.25901867	19.6050396	3.82259045	51.35353026
355.7054978	403.8916357	321.0659396	437.1919885	498.531228	2.914035351	221.3669979	912.9457588	0.288949145	510.7231835	509.2376328	668.9298703	1.499740853	142.1921897	259.1068899	2.255900112	72.4962935	50.36305093	61.46245806	500.9255432	218.1967987	6.610607939	4.15015297	0.226608983	705.4051377	710.6645948	697.3482463	0.303730734	411.1627073	2614.640405	661.0009198	16.27757025	19.52827643	3.953914608	51.2835482
355.7021603	403.8891387	321.0603719	437.1891152	498.5271502	2.914976033	221.3603876	912.9472317	0.288929748	510.7534686	509.108166	668.644396	1.508243057	142.088425	258.7538075	2.255900085	72.11537415	50.354854	61.40817623	500.9426811	218.2268491	6.610991587	4.15003928	0.226771785	704.7904558	710.2832344	697.4704005	0.303662809	406.9099726	2607.353488	660.6635616	16.2964377	19.64807949	3.81856741	51.65811535
355.6988126	403.8866406	321.0547997	437.1862377	498.523069	2.915921817	221.3537737	912.9487061	0.288910373	510.7884125	509.0164565	668.3718342	1.516617836	141.998733	258.4277812	2.255898626	71.84045308	50.35311318	61.4277097	500.9609782	218.2455743	6.611622341	4.149962324	0.226922487	704.2296661	709.9373055	697.58777	0.303605982	403.3898641	2600.956803	660.3337083	16.31367242	19.83021941	3.96091606	51.18192801
355.6954548	403.8841416	321.0492228	437.1833559	498.5189843	2.916872683	221.3471561	912.9501819	0.288891018	510.8160226	508.9715828	668.1093794	1.524241388	141.9366379	258.1322399	2.255900439	71.6149268	50.35842229	61.4769612	500.9802839	218.2527016	6.612196093	4.149892989	0.227029731	703.6995946	709.6157352	697.7168261	0.303561778	400.404118	2595.108518	659.9992504	16.32857203	19.64197571	3.833566845	51.39343871
355.6920868	403.8816415	321.0436413	437.1804698	498.5148963	2.917828613	221.340535	912.9516593	0.288871686	510.8343186	508.9941605	667.890106	1.530054296	141.9207883	257.9121982	2.25590691	71.4773936	50.36682249	61.57211233	500.9963118	218.2403908	6.612658144	4.14983477	0.227068352	703.2716513	709.3726753	697.8713728	0.303541708	398.5875978	2590.46294	659.6939341	16.33852188	19.8093165	3.808341599	51.58534082
355.6887086	403.8791404	321.0380553	437.1775795	498.5108048	2.918789586	221.3339102	912.9531381	0.288852375	510.8421363	509.1124421	667.7595138	1.532515775	141.9856611	257.8158756	2.255921125	71.46729404	50.37302055	61.72812842	501.0012691	218.1991504	6.612842163	4.14978223	0.226997921	703.0413137	709.2812163	698.0654414	0.303561603	398.8229696	2587.907767	659.4647109	16.34286425	19.56379413	3.77607004	52.28015965
355.6853203	403.8766384	321.0324646	437.174685	498.5067099	2.919755582	221.3272819	912.9546184	0.288833085	510.8364706	509.3253278	667.7197364	1.53150795	142.1285523	257.8462625	2.25594335	71.57229443	50.37680419	61.93228523	500.9945491	218.1291684	6.612679037	4.149729151	0.226816205	703.0045987	709.3365173	698.2925746	0.303620985	401.0946399	2587.459874	659.3135997	16.33883994	19.67649421	3.817150827	52.09450785
355.6819218	403.8741353	321.0268695	437.1717863	498.5026117	2.920726582	221.3206501	912.9561002	0.288813818	510.8209557	509.6076249	667.7515424	1.528191298	142.3110434	257.9828434	2.255968275	71.79444349	50.38069886	62.18766444	500.9800567	218.0360399	6.612390257	4.14969234	0.226568054	703.118234	709.4960085	698.518682	0.303708688	405.0286124	2588.938875	659.2275414	16.3288697	19.73467654	3.906625652	51.84840734
355.6785131	403.8716312	321.0212698	437.1688833	498.49851	2.921702566	221.3140147	912.9575834	0.288794571	510.7936558	509.9345493	667.8268956	1.523489829	142.5066599	258.1845698	2.255994284	72.07876681	50.38819477	62.4591376	500.960554	217.928163	6.611933372	4.149659713	0.226279366	703.3065007	709.6967679	698.7116551	0.303811846	409.9966098	2591.79714	659.1794418	16.31572761	19.81338461	3.734495391	51.95133841
355.6750944	403.8691261	321.0156655	437.1659761	498.494405	2.922683514	221.3073758	912.9590681	0.288775346	510.7483603	510.2627021	667.8844427	1.519093096	142.6733706	258.3666202	2.256020341	72.30099013	50.40677656	62.67006678	500.9424591	217.8220246	6.611157377	4.149599943	0.225988325	703.4096592	709.813014	698.826272	0.303906058	414.6403976	2594.706404	659.1047822	16.30458645	19.82824565	3.881164954	51.91877819
355.6716654	403.86662	321.0100568	437.1630647	498.4902966	2.923669407	221.3007333	912.9605542	0.288756143	510.6860066	510.5659365	667.9049259	1.51591718	142.7811193	258.4988072	2.256043118	72.42871945	50.43753864	62.79790515	500.9275467	217.7249483	6.610101063	4.149510016	0.225729467	703.3729699	709.7953189	698.8257046	0.303979659	418.5209362	2597.366158	658.9895025	16.29788336	20.03099924	3.827751023	51.40948832
355.6682264	403.8641129	321.0044436	437.160149	498.4861849	2.924660225	221.2940874	912.9620418	0.288736961	510.6098463	510.8453442	667.9169326	1.513494343	142.8303675	258.6088031	2.25606055	72.49554741	50.47426027	62.85409898	500.9107482	217.6338182	6.608782521	4.149395786	0.225507868	703.2514924	709.6790591	698.6939902	0.304037514	422.1751498	2600.453236	658.8713084	16.29446291	20.11916446	3.965418085	52.01220577
355.6647771	403.8616048	320.9988258	437.1572292	498.4820698	2.925655948	221.2874379	912.9635308	0.2887178	510.5221012	511.0688622	667.9004019	1.512878721	142.7867297	258.6611323	2.256068452	72.4642877	50.51684386	62.81186988	500.8932984	217.557505	6.607242991	4.14925283	0.225366158	702.9854364	709.4094375	698.3855642	0.304066041	425.1377576	2603.668027	658.7379118	16.29715471	20.04975496	3.790031359	52.09424664
355.6613178	403.8590957	320.9932037	437.1543051	498.4779514	2.926656557	221.280785	912.9650213	0.288698662	510.4281345	511.1937014	667.8283643	1.515621024	142.6016775	258.6109451	2.256060219	72.30303644	50.56544537	62.64952171	500.8776881	217.5072734	6.605632851	4.149084974	0.225367223	702.5014381	708.917895	697.8415283	0.304047344	426.8281576	2606.6662	658.5737111	16.30975644	19.98839865	3.982619445	52.20440247
355.6578483	403.8565856	320.987577	437.1513769	498.4738296	2.927662032	221.2741287	912.9665131	0.288679544	510.3325129	511.2174361	667.7078486	1.521618846	142.2831759	258.4632254	2.25603519	72.02401071	50.62015146	62.37291988	500.8639975	217.4830325	6.603997299	4.148899415	0.225511514	701.8208554	708.2225055	697.0737204	0.303982369	427.3065756	2609.419941	658.3896331	16.33178083	20.02605425	3.939548296	51.99338646
355.6543687	403.8540745	320.981946	437.1484444	498.4697046	2.928672353	221.2674688	912.9680065	0.288660448	510.2381467	511.1579109	667.5457323	1.53012539	141.8745156	258.2308091	2.255997607	71.63796148	50.68622592	61.99249798	500.8548703	217.4809406	6.602302108	4.148701479	0.225759008	700.9825857	707.3686374	696.15091	0.303879006	426.575487	2611.508104	658.1866735	16.36100354	20.0558439	3.761200053	51.52641017
355.6508789	403.8515625	320.9763105	437.1455078	498.4655762	2.9296875	221.2608056	912.9695012	0.288641374	510.1521681	511.0417714	667.3716613	1.539968864	141.4268484	257.9553453	2.255950518	71.20375391	50.76522961	61.54672943	500.8504177	217.4924472	6.600610918	4.148511196	0.226067619	700.082461	706.4437802	695.1480517	0.303751958	425.1266427	2613.03877	657.9933856	16.3936875	19.93808098	3.79552815	51.67137735
355.647379	403.8490495	320.9706706	437.142567	498.4614445	2.930707454	221.2541389	912.9709974	0.288622321	510.0839678	510.9270978	667.2509697	1.548671766	141.0320217	257.7287846	2.255899935	70.84034095	50.85653192	61.11070311	500.8478366	217.4987074	6.59899239	4.148361138	0.226354486	699.312726	705.6173941	694.1899046	0.303632251	424.1653364	2614.650844	657.8721591	16.42229881	19.73898207	3.841973383	51.64460036
355.643869	403.8465355	320.9650263	437.139622	498.4573095	2.931732195	221.2474689	912.9724949	0.288603289	510.0429082	510.8333915	667.2009623	1.555399961	140.7413629	257.5744773	2.255848838	70.59194835	50.96405164	60.71730408	500.8493411	217.4942363	6.597529172	4.148270867	0.226582818	698.7466705	704.9625665	693.356598	0.303530761	423.9164998	2616.09824	657.8389105	16.44371299	19.53533864	3.862031979	52.21462402
355.6403488	403.8440205	320.9593776	437.1366728	498.4531712	2.932761704	221.2407954	912.9739939	0.288584279	510.0405412	510.7362855	667.1990805	1.561072548	140.554286	257.4538402	2.255794769	70.44510372	51.09276077	60.36481877	500.8601559	217.4868405	6.596381908	4.148252529	0.226777652	698.3515357	704.4597686	692.6624816	0.303437773	423.821228	2616.595797	657.8770095	16.45949709	19.44139618	4.030231649	52.53587797
355.6368186	403.8415045	320.9537246	437.1337195	498.4490296	2.93379596	221.2341186	912.9754943	0.28856529	510.0899672	510.6573989	667.2624905	1.564824673	140.5332904	257.3891704	2.255741067	70.45425159	51.24798362	60.09598284	500.8836652	217.4707248	6.59568237	4.148332071	0.226897724	698.2114869	704.1950479	692.2066239	0.303365471	424.0930294	2615.760964	658.0022667	16.46611207	19.43646247	3.987698116	52.90361382
355.6332782	403.8389876	320.9480672	437.1307619	498.4448848	2.934834944	221.2274384	912.976996	0.288546323	510.2053385	510.625584	667.4069481	1.565592415	140.7573312	257.4031575	2.255692906	70.67593874	51.43764817	59.95851193	500.9247972	217.438963	6.595555774	4.148537212	0.226886549	698.4185281	704.2672575	692.115319	0.303328578	424.8955731	2612.990828	658.2256238	16.45933803	19.40640099	3.990185209	52.54135953
355.6297277	403.8364697	320.9424055	437.1278002	498.4407367	2.935878637	221.2207548	912.9784992	0.288527378	510.3856374	510.6403547	667.626525	1.563497492	141.2245012	257.4832772	2.255651468	71.10114376	51.65894586	59.95364195	500.9830599	217.3931989	6.596025879	4.148861235	0.226748099	698.9569821	704.6677953	692.396863	0.303326463	426.103612	2608.202683	658.5387859	16.43981048	19.33801232	3.897150143	52.42637989
355.626167	403.8339508	320.9367395	437.1248344	498.4365853	2.936927018	221.2140679	912.9800038	0.288508453	510.6127549	510.7038879	667.9211113	1.558602426	141.8891303	257.6247459	2.255618056	71.69551505	51.897395	60.06125218	501.0503798	217.3341934	6.59695937	4.149267382	0.226502269	699.7770382	705.3455397	692.9895999	0.303357933	427.8508572	2602.211747	658.9358297	16.40969924	19.32414721	3.919338625	52.11891381
355.6225963	403.831431	320.9310691	437.1218644	498.4324307	2.937980068	221.2073777	912.9815097	0.28848955	510.8687178	510.7982982	668.2646754	1.551854606	142.6843708	257.7850158	2.255592474	72.38564847	52.14061795	60.24024522	501.1212296	217.2698625	6.598235795	4.149711687	0.2261937	700.76514	706.1981336	693.8088154	0.303411226	429.7526765	2595.370625	659.385527	16.37359811	19.35817015	3.95956956	52.13307193
355.6190154	403.8289102	320.9253945	437.1188903	498.4282728	2.939037767	221.2006842	912.983017	0.288470669	511.1253346	510.8745828	668.6007355	1.545507444	143.4777865	257.8751205	2.255571149	73.02968155	52.37065228	60.40519925	501.188131	217.2180978	6.599667826	4.150122432	0.225920746	701.6970516	707.020764	694.6787636	0.303458077	430.908992	2588.077191	659.8277845	16.3405993	19.54594131	3.854207751	52.06546943
355.6154245	403.8263884	320.9197156	437.115912	498.4241117	2.940100095	221.1939874	912.9845257	0.288451809	511.3612981	510.9293503	668.9110915	1.54008408	144.2113573	257.8651066	2.255556062	73.56607242	52.57275152	60.52572046	501.2438757	217.1832778	6.601111161	4.150452195	0.225713052	702.4767329	707.7273739	695.5281878	0.303492515	431.1419664	2580.920065	660.2346632	16.31423339	19.82017975	3.862661406	51.81697978
355.6118234	403.8238657	320.9140324	437.1129296	498.4199474	2.941167034	221.1872873	912.9860357	0.28843297	511.569386	510.996709	669.2043222	1.534716713	144.9121279	257.7674748	2.255554152	74.01087295	52.74089302	60.62840359	501.2855417	217.1591433	6.602536777	4.150687905	0.22553388	703.128235	708.3504096	696.4112143	0.303527413	430.7092008	2574.148557	660.600544	16.29283298	19.93346708	3.870407508	51.77103108
355.6082122	403.821342	320.9083449	437.109943	498.4157799	2.942238562	221.1805839	912.9875472	0.288414153	511.7218121	511.0770304	669.457693	1.529970521	145.5105383	257.5467946	2.255568624	74.28892437	52.85697141	60.6777368	501.3041508	217.1501939	6.60375261	4.150769483	0.225414723	703.5328984	708.7844308	697.2426958	0.303556683	429.4174031	2568.520969	660.8884455	16.28059637	19.98318571	3.963017007	51.83844939
355.604591	403.8188174	320.9026533	437.1069523	498.4116091	2.943314661	221.1738773	912.9890599	0.288395357	511.7820094	511.1744352	669.649488	1.526365937	145.9181471	257.1695701	2.25560339	74.31216749	52.89740065	60.62972195	501.2872823	217.160313	6.604490816	4.150621317	0.225391828	703.5531556	708.903225	697.9088959	0.30357453	427.1768429	2565.195168	661.0590407	16.28240135	19.99561423	3.857095007	51.44991062
355.6009596	403.8162918	320.8969574	437.1039575	498.4074352	2.94439531	221.1671675	912.990574	0.288376583	511.7474006	511.2934816	669.7764318	1.523842243	146.1296574	256.6421105	2.255658509	74.08556953	52.86081769	60.4893512	501.2351605	217.1885305	6.604708999	4.150246972	0.225460085	703.1901158	708.7063416	698.3963118	0.303582674	424.0724422	2564.384923	661.1077302	16.29820845	19.98843576	3.952527532	51.64137114
355.5973181	403.8137653	320.8912573	437.1009585	498.403258	2.945480491	221.1604544	912.9920895	0.28835783	511.6387172	511.4127615	669.834373	1.522746706	146.160522	255.9814295	2.255726565	73.65167798	52.76177583	60.26947225	501.1575424	217.2364555	6.604497874	4.149704712	0.225620179	702.4972235	708.2332172	698.698241	0.303576946	420.0683932	2565.642036	661.0484042	16.32677328	20.07200183	3.983980024	51.80184083
355.5936665	403.8112378	320.885553	437.0979555	498.3990777	2.946570182	221.1537381	912.9936063	0.288339099	511.4798595	511.5352247	669.8381767	1.522534297	146.0640615	255.2355367	2.255803032	73.09509334	52.61667209	60.01196346	501.064466	217.2985434	6.603965819	4.149065845	0.225836454	701.5934541	707.5838864	698.8602566	0.303564844	415.5078696	2568.634765	660.9104128	16.36408992	20.08635451	3.925602446	52.05240528
355.5900049	403.8087094	320.8798446	437.0949483	498.3948942	2.947664366	221.1470186	912.9951245	0.288320388	511.3188262	511.6791889	669.8273918	1.521714026	145.9709514	254.4987684	2.25588257	72.58796243	52.45741878	59.80863487	500.9742586	217.3615273	6.603378283	4.148461581	0.226023929	700.7302824	706.9786768	699.0246698	0.303566094	411.0989249	2572.509952	660.7564701	16.40105262	20.06752463	3.950802875	52.39035982
355.5863331	403.8061801	320.8741319	437.091937	498.3907075	2.948763021	221.140296	912.9966439	0.2883017	511.1757142	511.8359257	669.8073282	1.52017318	145.9072742	253.8119154	2.255958231	72.19615686	52.29991866	59.68441032	500.8968964	217.4225735	6.602786202	4.147959842	0.226164376	699.9947506	706.4830322	699.188842	0.303582377	407.0879089	2577.078963	660.6089028	16.4349057	20.11258262	3.895375867	52.04626936
355.5826513	403.8036498	320.8684152	437.0889217	498.3865177	2.949866128	221.1335701	912.9981647	0.288283032	511.0340989	511.9889248	669.7557092	1.518702915	145.7989617	253.1683804	2.256025568	71.87809947	52.13818379	59.60410157	500.8302064	217.4857404	6.601976005	4.147547166	0.226291188	699.3100286	706.0116311	699.220273	0.303603787	403.4379445	2583.130215	660.4469531	16.46894052	20.20093727	4.010356684	52.37283346
355.5789593	403.8011186	320.8626943	437.0859022	498.3823247	2.950973668	221.1268411	912.9996869	0.288264386	510.9169935	512.1255623	669.6786612	1.517219792	145.6705798	252.6200463	2.25607534	71.71110952	51.99189501	59.59302543	500.7861856	217.5476289	6.600982623	4.147305975	0.226385092	698.7776214	705.636918	699.1002264	0.303631299	400.4702539	2590.523628	660.2983008	16.4999908	20.26379195	3.74332343	51.74599456
355.5752573	403.7985864	320.8569692	437.0828786	498.3781286	2.95208562	221.120109	913.0012103	0.288245762	510.8562958	512.2215592	669.5816265	1.515830216	145.5508897	252.2262142	2.256094602	71.78818567	51.88769276	59.67765043	500.780898	217.6057635	6.599875725	4.147342903	0.226430048	698.5200377	705.4448302	698.8018299	0.303663026	398.484339	2598.919771	660.198693	16.52436463	20.23667812	3.961061942	51.98099689
355.5715452	403.7960533	320.8512401	437.0798509	498.3739293	2.953201966	221.1133737	913.0027351	0.288227158	510.8511361	512.2720044	669.4646395	1.514648225	145.4333799	251.9915221	2.256082228	72.10043652	51.82664803	59.84991885	500.8141704	217.6598624	6.59866253	4.147655856	0.22643043	698.5317933	705.4268596	698.3110101	0.303696378	397.5069939	2608.260711	660.1492804	16.54208408	20.25362323	4.031963163	51.55492686
355.567823	403.7935193	320.8455069	437.0768192	498.3697269	2.954322685	221.1066353	913.0042611	0.288208576	510.8945876	512.2958531	669.3426922	1.513159224	145.3484661	251.9006416	2.256046874	72.6139939	51.80051241	60.1094075	500.8784323	217.7068926	6.597482776	4.148193018	0.226374587	698.7980374	705.5886508	697.719488	0.303735985	397.4954921	2618.040562	660.1486687	16.5524812	20.30149238	3.905648074	51.319482
355.5640908	403.7909844	320.8397696	437.0737834	498.3655214	2.955447758	221.0998938	913.0057885	0.288190016	510.964978	512.2977327	669.2135679	1.511561081	145.271628	251.9116585	2.255996236	73.23894233	51.79303569	60.41956274	500.9617242	217.7490774	6.596361536	4.148869366	0.226285575	699.2185179	705.854676	697.0417883	0.303776906	398.176762	2628.100091	660.1751687	16.55830154	20.27705986	4.032788231	51.02087014
355.5603484	403.7884485	320.8340282	437.0707435	498.3613128	2.956577164	221.0931492	913.0073171	0.288171476	511.0106401	512.285185	669.0605364	1.510519373	145.1217355	251.9295949	2.255945031	73.78397903	51.76656251	60.69877752	501.0389395	217.7935488	6.595217543	4.149508884	0.226221937	699.5563902	706.0375853	696.2539917	0.303807525	398.9415691	2638.64928	660.1719433	16.56688282	20.23992078	4.016916013	51.02822584
355.556596	403.7859117	320.8282828	437.0676995	498.357101	2.957710885	221.0864016	913.0088471	0.288152959	511.0210892	512.2646539	668.8943539	1.509906384	144.9083509	251.9285565	2.255900478	74.18727788	51.7120173	60.92489378	501.1010151	217.8398642	6.594179777	4.150046231	0.226191305	699.7630416	706.1092115	695.4182091	0.303825974	399.6166528	2649.126852	660.1347013	16.57891436	20.24337484	4.159420672	51.0336053
355.5528336	403.783374	320.8225334	437.0646515	498.3528862	2.958848901	221.0796509	913.0103783	0.288134462	511.0243217	512.2267611	668.7413441	1.509301902	144.6973423	251.9512077	2.255857909	74.50742054	51.65000088	61.11938346	501.1564332	217.8828926	6.59349177	4.150535701	0.226168916	699.9526242	706.1666463	694.6117412	0.30383386	400.4186612	2658.510852	660.1059321	16.58986865	20.31823926	4.160697354	51.79750377
355.549061	403.7808354	320.8167799	437.0615994	498.3486683	2.959991191	221.0728971	913.0119108	0.288115987	511.0115202	512.177365	668.6186339	1.508505249	144.5096585	251.968778	2.255825647	74.67536	51.57202433	61.25694	501.1950647	217.9218505	6.593347505	4.150903233	0.226162369	700.079347	706.1876245	693.9236777	0.303828869	401.1349544	2665.95564	660.0866597	16.60006946	20.34443554	3.987779713	51.09118456
355.5452784	403.7782959	320.8110225	437.0585432	498.3444473	2.961137737	221.0661403	913.0134446	0.288097533	510.9735156	512.1305153	668.5522277	1.507038757	144.3867473	251.9458001	2.255815798	74.61333229	51.46722857	61.31514301	501.2040745	217.9546517	6.594022324	4.151056032	0.226172309	700.1001917	706.1616656	693.4950089	0.303811331	401.5212262	2670.311893	660.080751	16.60926378	20.34231883	3.984121103	51.32705925
355.5414857	403.7757554	320.805261	437.0554831	498.3402232	2.962288518	221.0593805	913.0149797	0.2880791	510.9152499	512.0872008	668.5475722	1.504840857	144.3436507	251.8862392	2.255828265	74.33171946	51.34048473	61.2966054	501.1841462	217.9790202	6.595532961	4.150999002	0.226195818	700.0317366	706.1021656	693.3444522	0.303782319	401.5986552	2671.345697	660.0955556	16.61665167	20.27821586	4.066266295	51.50241276
355.537683	403.7732141	320.7994956	437.0524188	498.3359961	2.963443515	221.0526177	913.016516	0.288060689	510.8286399	512.0472891	668.5791578	1.502456893	144.331009	251.7836817	2.255859488	73.84354881	51.19132978	61.19834553	501.1368336	217.9956868	6.597559398	4.150748534	0.226249155	699.8348487	705.9583627	693.3621429	0.303741473	401.3688517	2670.039264	660.1089907	16.62456974	20.0954742	4.087033544	51.47574526
355.5338702	403.7706718	320.7937262	437.0493505	498.3317659	2.964602707	221.0458519	913.0180536	0.288042299	510.7278035	512.0096624	668.6367307	1.500014355	144.3484008	251.667824	2.255901925	73.23039793	51.03475711	61.04824911	501.0721282	218.0013393	6.599894869	4.15037932	0.226322242	699.5705686	705.764123	693.4854424	0.303693501	401.0573008	2666.942461	660.1277677	16.63178963	19.98416035	4.090848256	51.48605484
355.5300474	403.7681287	320.7879529	437.0462782	498.3275327	2.965766077	221.0390831	913.0195925	0.28802393	510.6496283	511.9651256	668.7063154	1.497627808	144.4094477	251.6163654	2.255937865	72.67423552	50.90529588	60.91060897	501.0139415	217.9899074	6.602234474	4.150065278	0.2263854	699.401386	705.6223162	693.6035069	0.303647148	401.2056112	2662.940257	660.1784709	16.63447322	19.89249995	4.024985869	51.49078271
355.5262145	403.7655846	320.7821756	437.0432018	498.3232964	2.966933603	221.0323114	913.0211326	0.288005583	510.5979489	511.9175567	668.7724029	1.495540785	144.4985145	251.6352042	2.255963304	72.22505309	50.81001853	60.80143601	500.9672496	217.9594278	6.604317874	4.149847326	0.226439711	699.3402079	705.5294905	693.6504721	0.303606564	401.8906574	2658.720682	660.2540221	16.63302746	19.84859443	3.899625954	51.41321299
355.5223715	403.7630397	320.7763944	437.0401214	498.3190571	2.968105266	221.0255367	913.0226739	0.287987257	510.5567738	511.8837563	668.8361006	1.493734931	144.6143712	251.6751712	2.255987949	71.82355276	50.7362246	60.70127642	500.9206894	217.9094251	6.606108431	4.149648992	0.226500208	699.3082298	705.4317492	693.6750038	0.303573566	402.8078577	2654.115733	660.3360447	16.62957145	19.80370876	4.026269074	51.65287679
355.5185185	403.7604938	320.7706093	437.037037	498.3148148	2.969281046	221.018759	913.0242165	0.287968952	510.5288756	511.8714278	668.8781916	1.492476607	144.7384581	251.7361638	2.25600835	71.52544769	50.69021636	60.62965369	500.8790404	217.8378385	6.607284788	4.149511738	0.226568975	699.3126695	705.3205014	693.6053711	0.303554023	404.004671	2649.977137	660.4129754	16.62489132	19.81771254	3.882762432	51.60704895
355.5146555	403.7579471	320.7648203	437.0339486	498.3105695	2.970460923	221.0119785	913.0257604	0.287950669	510.5110722	511.8898823	668.8666736	1.492262112	144.8271925	251.8098188	2.256020423	71.38653877	50.67529625	60.60451405	500.8468308	217.7437767	6.607380289	4.149478004	0.226656146	699.3345223	705.1593532	693.322651	0.303553937	405.4957886	2647.657845	660.4598359	16.62116634	19.71284583	4.003881548	51.52825655
355.5107824	403.7553995	320.7590275	437.0308562	498.3063211	2.971644879	221.005195	913.0273054	0.287932407	510.5012257	511.9417969	668.8026212	1.493066402	144.8766358	251.8851791	2.256025148	71.39925623	50.68781255	60.62353099	500.8232573	217.6286396	6.606365863	4.149540194	0.226762859	699.3633404	704.9486088	692.8422257	0.303573485	407.1926706	2647.261521	660.4736154	16.61901859	19.75093872	3.923014512	51.4452919
355.5068992	403.7528509	320.7532308	437.0277597	498.3020698	2.972832893	220.9984086	913.0288517	0.287914166	510.511808	512.0142681	668.7075205	1.494536763	144.9100841	251.9867057	2.256018812	71.57017645	50.73055056	60.68949304	500.8138321	217.4953985	6.604480897	4.14972429	0.226871594	699.4605423	704.7601599	692.2303979	0.303608724	409.16701	2648.302842	660.4801365	16.61644636	19.70413296	4.060131882	51.5857711
355.5030061	403.7503015	320.7474302	437.0246593	498.2978155	2.974024945	220.9916194	913.0303992	0.287895946	510.5380267	512.1016638	668.6021892	1.496375257	144.9359933	252.0998133	2.256005057	71.83687128	50.79143737	60.78057296	500.8141338	217.3494215	6.60198873	4.149986325	0.226980672	699.6091719	704.6115296	691.5803829	0.303653504	411.2342068	2650.199823	660.4873635	16.61370675	19.9624527	3.932635602	51.48494217
355.4991029	403.7477512	320.7416258	437.0215548	498.2935582	2.975221016	220.9848273	913.0319479	0.287877748	510.5644709	512.1981258	668.5276306	1.498003127	144.9769083	252.183716	2.255995259	72.05161971	50.84435573	60.84562025	500.8100634	217.1992321	6.599445392	4.15020606	0.227093298	699.7466463	704.5076847	691.0851282	0.303696243	412.9820174	2651.528274	660.5055334	16.61156291	20.0891911	4.006276588	51.63937337
355.4951896	403.7452001	320.7358176	437.0184463	498.2892979	2.976421086	220.9780323	913.0334979	0.287859571	510.5918793	512.294648	668.5004193	1.499142153	145.035699	252.2380835	2.255989132	72.18343523	50.88069508	60.87514085	500.8023684	217.0511205	6.597057445	4.150375155	0.227201471	699.884485	704.4878399	690.8126166	0.303731616	414.3155445	2652.029153	660.5453051	16.6099079	20.10152968	4.053256903	52.00549497
355.4912663	403.742648	320.7300056	437.0153339	498.2850346	2.977625136	220.9712345	913.035049	0.287841415	510.6252058	512.3882216	668.5042051	1.499961825	145.0796721	252.2747033	2.255979274	72.28853924	50.90149398	60.8909523	500.8005891	216.9093288	6.594580622	4.150559027	0.227298943	700.0518795	704.5777157	690.6954574	0.303761597	415.3007922	2652.81506	660.5997474	16.60961496	20.43836928	3.819546339	51.43473376
355.487333	403.7400951	320.7241898	437.0122175	498.2807684	2.978833145	220.9644339	913.0366013	0.28782328	510.6645593	512.4671999	668.5553929	1.50016366	145.1046522	252.2942868	2.255964514	72.33311508	50.89522201	60.88363241	500.8065195	216.7824635	6.592236662	4.150753851	0.227376013	700.261884	704.8235483	690.8017458	0.303779672	415.8325613	2653.753681	660.6788632	16.61082798	20.64986129	3.959718543	51.68415112
355.4833897	403.7375413	320.7183702	437.0090971	498.2764993	2.980045094	220.9576304	913.0381549	0.287805167	510.7153226	512.5131772	668.6768794	1.499331548	145.1124584	252.3117279	2.25594133	72.29002976	50.85177203	60.84669041	500.8250243	216.6806388	6.59034066	4.150972524	0.22741529	700.5555682	705.300823	691.2142538	0.303777507	415.8675131	2654.589757	660.8025459	16.61284815	20.7083994	3.930651527	51.65903867
355.4794363	403.7349866	320.7125469	437.0059727	498.2722272	2.981260964	220.9508242	913.0397096	0.287787075	510.7773005	512.5246351	668.8622371	1.497546644	145.0976871	252.3296392	2.25590913	72.16765819	50.77274869	60.78544328	500.8571901	216.6055631	6.588920406	4.151219065	0.227415246	700.9263643	705.9969897	691.9063955	0.303755167	415.4280382	2655.445556	660.9666239	16.61579227	20.68283271	3.980349996	51.41884306
355.4754729	403.7324311	320.7067198	437.0028443	498.2679522	2.982480734	220.9440151	913.0412655	0.287769004	510.8417991	512.5120619	669.0987307	1.495073856	145.0727974	252.3310052	2.255875185	71.94821102	50.66483892	60.69510446	500.894206	216.5521615	6.588048011	4.151436683	0.227388623	701.3076864	706.8202426	692.8357785	0.303715776	414.4967332	2655.839438	661.1553821	16.61985138	20.76258269	3.938522164	51.54492977
355.4714995	403.7298747	320.700889	436.999712	498.2636742	2.983704385	220.9372033	913.0428226	0.287750955	510.9079568	512.4843389	669.3595602	1.492347334	145.0381361	252.3197485	2.255840709	71.67465956	50.54348753	60.59312254	500.9349775	216.5144778	6.587613112	4.151626644	0.227342407	701.6691919	707.6938367	693.8903372	0.303665738	413.2235443	2655.932602	661.3519567	16.62484785	20.83865127	3.99499089	51.60811446
355.4675161	403.7273174	320.6950545	436.9965757	498.2593934	2.984931897	220.9303888	913.0443809	0.287732926	510.9768838	512.4600109	669.5908255	1.490218864	144.9836044	252.3063664	2.255804912	71.45233155	50.43782929	60.51893771	500.9809681	216.4803476	6.587212715	4.151821985	0.227289624	701.9752619	708.4955482	694.8450912	0.303618977	411.9147359	2656.500632	661.52433	16.63076619	20.84331517	3.910825431	51.78567288
355.4635226	403.7247593	320.6892163	436.9934354	498.2551096	2.98616325	220.9235715	913.0459404	0.287714919	511.0445774	512.4457261	669.7706262	1.489069165	144.9166741	252.292246	2.255771493	71.2968275	50.36120052	60.48106141	501.027784	216.4445036	6.586890622	4.151997253	0.227238359	702.1791689	709.1351943	695.6070139	0.303579591	410.6972046	2657.30469	661.6567519	16.63723678	20.8264907	3.913716016	51.64418058
355.4595192	403.7222003	320.6833743	436.9902912	498.2508229	2.987398425	220.9167514	913.047501	0.287696933	511.1078991	512.430753	669.9064299	1.488795703	144.8501082	252.284741	2.255743319	71.16550817	50.31189753	60.46888511	501.0718872	216.4111516	6.587054319	4.1521134	0.227184048	702.2593797	709.5915962	696.1962581	0.303541713	409.5916303	2657.575162	661.7536531	16.64341749	20.80941954	3.965374885	51.65430938
355.4555057	403.7196405	320.6775288	436.9871431	498.2465333	2.988637403	220.9099287	913.0490627	0.287678968	511.162185	512.4213244	669.9726506	1.489852373	144.7955602	252.2894942	2.255724922	71.07382439	50.30677111	60.49160291	501.1076964	216.3737523	6.587805188	4.152137191	0.227135884	702.1603193	709.7539347	696.4995094	0.303509573	408.7801626	2656.901901	661.7975173	16.64858261	20.83406469	4.039832987	51.84732025
355.4514822	403.7170798	320.6716795	436.983991	498.2422409	2.989880163	220.9031033	913.0506257	0.287661025	511.1993408	512.4274239	669.9406802	1.492779661	144.7733033	252.3069177	2.255724086	71.02554423	50.3656582	60.55423631	501.1254419	216.3229298	6.589296368	4.152008925	0.227108545	701.8010003	709.4749863	696.3921736	0.303488271	408.4514138	2654.557735	661.7664127	16.65186333	20.79388548	3.965455252	51.81650346
355.4474487	403.7145182	320.6658266	436.980835	498.2379456	2.991126685	220.8962751	913.0521898	0.287643103	511.218005	512.4470943	669.8124091	1.497521562	144.7868087	252.339437	2.255741258	71.01337583	50.48566343	60.65283257	501.1240637	216.2592615	6.591552665	4.1517224	0.227103237	701.1870219	708.7591215	695.8822459	0.3034775	408.6308967	2650.487109	661.6617837	16.65301119	20.83690866	3.908484294	51.43382925
355.4434052	403.7119558	320.6599701	436.977675	498.2336474	2.99237695	220.8894443	913.053755	0.287625201	511.2228124	512.4789112	669.5996631	1.503765326	144.8200567	252.387461	2.25577028	71.05956295	50.65181658	60.78740243	501.1103328	216.1862353	6.594210573	4.151333409	0.227117146	700.3932071	707.7131055	695.0308781	0.303478708	409.261406	2645.661685	661.494386	16.65268092	20.73580223	4.052538037	51.52969763
355.4393517	403.7093926	320.65411	436.9745111	498.2293463	2.993630939	220.8826108	913.0553214	0.287607321	511.2157337	512.5147309	669.3310283	1.51095185	144.8662685	252.4480106	2.255807205	71.1393043	50.84084604	60.9414491	501.0879853	216.1108593	6.597141185	4.150867732	0.227144973	699.4901515	706.4611591	693.9671269	0.303488093	410.203358	2640.518254	661.2838195	16.65128247	20.6828555	4.036804923	51.91334997
355.4352882	403.7068285	320.6482462	436.9713433	498.2250424	2.994888631	220.8757747	913.0568889	0.287589463	511.2011154	512.534921	669.0655761	1.517979947	144.9137073	252.5160237	2.25584494	71.18975472	51.00927714	61.08167768	501.0642185	216.0486945	6.600275542	4.150365283	0.22717161	698.6003927	705.2358514	692.9503509	0.303495121	411.1517794	2635.587663	661.070116	16.6495207	20.73372332	4.040512216	51.47459226
355.4312147	403.7042636	320.6423789	436.9681715	498.2207357	2.996150008	220.8689359	913.0584575	0.287571625	511.1816727	512.535642	668.8265339	1.524373151	144.9563216	252.5901462	2.255879093	71.20435191	51.13690926	61.19545517	501.0429252	216.0033703	6.60334243	4.149861536	0.227195563	697.8018012	704.157038	692.0877183	0.303499015	412.0213521	2631.482448	660.8706315	16.64770613	20.76843737	4.01330688	51.39764701
355.4271313	403.7016978	320.636508	436.9649958	498.2164261	2.997415048	220.8620946	913.0600273	0.287553809	511.1551946	512.5261336	668.6030051	1.530299933	145.0050768	252.672901	2.255911403	71.20465588	51.22900453	61.28354084	501.0204774	215.9665895	6.606110866	4.149352029	0.227229651	697.0982542	703.1960693	691.3354223	0.303506192	412.9556489	2628.286413	660.6794383	16.64527427	20.85419288	4.595352739	52.03907153
355.4230378	403.6991312	320.6306335	436.9618163	498.2121137	2.998683733	220.8552506	913.0615981	0.287536014	511.125071	512.5032998	668.4238267	1.53518391	145.0553746	252.7622672	2.255936821	71.1834793	51.26169027	61.32944939	501.0010214	215.9412019	6.608217494	4.148878878	0.227273725	696.5863364	702.4985714	690.8257416	0.30351638	413.8600241	2626.711525	660.5182668	16.64250288	20.77236161	3.991766804	51.76423323
355.4189343	403.6965638	320.6247555	436.9586328	498.2077984	2.999956042	220.848404	913.0631701	0.287518239	511.0971494	512.4649834	668.3230401	1.538328392	145.0966227	252.8553117	2.255947727	71.1453608	51.2058399	61.31693924	500.9915301	215.9304168	6.609115346	4.148509122	0.227327094	696.3945077	702.2552871	690.7174304	0.303530402	414.6115512	2627.877623	660.4136198	16.63995804	20.57281959	4.010610236	51.81976238
355.4148208	403.6939955	320.618874	436.9554454	498.2034804	3.001231957	220.8415549	913.0647433	0.287500487	511.0723377	512.4136785	668.3006579	1.539729749	145.1298793	252.9507331	2.255943966	71.0946676	51.06580952	61.2445982	500.9917365	215.932532	6.608734248	4.148253303	0.227389862	696.5287239	702.4686809	691.0076402	0.303549447	415.2222054	2631.773862	660.3664029	16.63764957	20.4652347	4.005137829	52.02259388
355.4106974	403.6914264	320.612989	436.9522541	498.1991596	3.002511457	220.8347031	913.0663175	0.287482755	511.0504271	512.3475709	668.3474667	1.539611097	145.1554606	253.0456191	2.255928335	71.01634764	50.86155582	61.11620281	500.9996524	215.9492813	6.607437897	4.148096199	0.227452554	696.9268698	703.0614014	691.6414385	0.303570047	415.671242	2637.648944	660.3689421	16.6356856	20.31989752	3.969600607	51.87366074
355.4065639	403.6888565	320.6071004	436.9490589	498.1948359	3.003794523	220.8278489	913.0678928	0.287465044	511.0306278	512.2733901	668.4362115	1.538516441	145.1776625	253.1389957	2.255905072	70.92457619	50.62578106	60.94579076	501.0114678	215.9757598	6.605479735	4.148020821	0.227512812	697.5046123	703.8982309	692.4863453	0.303593889	416.0538622	2644.766921	660.4023922	16.63392698	20.2325035	3.910251368	52.11023588
355.4024205	403.6862858	320.6012084	436.9458599	498.1905095	3.005081134	220.8209921	913.0694692	0.287447355	511.0087947	512.2062049	668.5059824	1.537642714	145.2100196	253.2322708	2.255883962	70.85324229	50.42094609	60.76410964	501.0178258	215.999861	6.6033478	4.147974264	0.227572951	698.0849901	704.6866118	693.2554412	0.30362617	416.6244594	2651.695903	660.4242114	16.63174971	20.20890195	3.990144585	52.00143342
355.3982671	403.6837142	320.5953129	436.9426569	498.1861803	3.006371272	220.8141327	913.0710467	0.287429687	510.9863023	512.1503001	668.5403195	1.537355145	145.2526656	253.3208325	2.255867717	70.80706934	50.2757268	60.58060536	501.0168865	216.0194178	6.601289024	4.147952952	0.227625403	698.6008639	705.3309189	693.8614394	0.303666397	417.3927385	2657.75535	660.4228165	16.62934119	20.18032958	3.946427631	52.36522259
355.3941037	403.6811418	320.589414	436.9394501	498.1818483	3.007664917	220.8072709	913.0726253	0.287412039	510.9702936	512.103986	668.5649483	1.537203425	145.2943202	253.3952844	2.255851306	70.77936891	50.18305211	60.38460323	501.0143289	216.0383997	6.599092258	4.148012322	0.22765921	699.1152515	705.9452992	694.4119511	0.303712098	418.1770827	2663.317437	660.4173639	16.62756403	20.10787739	4.041179474	51.85773938
355.3899304	403.6785686	320.5835116	436.9362394	498.1775136	3.008962048	220.8004066	913.074205	0.287394413	510.9635625	512.0726933	668.5623378	1.53759685	145.3330942	253.4482011	2.255837388	70.77678842	50.17735705	60.18759959	501.0088522	216.0545845	6.597033375	4.148154531	0.22766366	699.5513451	706.4248655	694.8116781	0.3037624	418.9588323	2667.610649	660.3954801	16.62680583	20.12152487	3.919359293	51.77362945
355.3857471	403.6759946	320.5776057	436.9330248	498.1731761	3.010262647	220.7935398	913.0757857	0.287376808	510.969246	512.0605742	668.5122976	1.539024455	145.36557	253.4700804	2.255829488	70.79914362	50.30026611	60.00333018	500.9989646	216.0672205	6.595549622	4.148376143	0.227623017	699.8063806	706.6370536	694.9483283	0.30381446	419.6879959	2669.580002	660.342109	16.62760438	20.18001746	3.951243601	51.66292266
355.3815538	403.6734198	320.5716965	436.9298064	498.1688359	3.011566693	220.7866705	913.0773676	0.287359225	510.9883427	512.06834	668.4176559	1.541401612	145.3900558	253.4604762	2.255827318	70.84646046	50.55063082	59.83540594	500.9858332	216.0764831	6.59465504	4.148677082	0.227533954	699.8833565	706.5922774	694.8327432	0.303866682	420.3422933	2669.2366	660.2592039	16.63004839	20.31502705	3.87283168	51.38020896
355.3773505	403.6708442	320.5657839	436.9265841	498.1644929	3.012874167	220.7797987	913.0789505	0.287341662	511.0156221	512.0974674	668.2739705	1.544654181	145.4144192	253.4313524	2.255832359	70.92693729	50.91010846	59.69246178	500.9680234	216.0792369	6.594280944	4.149017278	0.227407516	699.7961445	706.292619	694.4589462	0.303919859	421.06022	2666.89602	660.1435458	16.63331131	20.34172533	3.893254702	51.30947136
355.3731373	403.6682677	320.5598678	436.9233579	498.1601472	3.014185049	220.7729246	913.0805344	0.28732412	511.0489074	512.1441195	668.1002528	1.548269835	145.4392727	253.3910348	2.255842373	71.03401374	51.34265177	59.57255688	500.9481819	216.077483	6.594230428	4.149382383	0.227249338	699.6157078	705.8437899	693.9264672	0.303971727	421.8461921	2663.27307	660.0081607	16.63702081	20.34853923	3.870017744	51.09311549
355.3689141	403.6656905	320.5539484	436.9201279	498.1557988	3.015499319	220.766048	913.0821194	0.2873066	511.0863534	512.1985957	667.9450564	1.5510911	145.4619962	253.351592	2.255850437	71.15085816	51.77324474	59.46044051	500.9331163	216.0772083	6.593965159	4.149774685	0.227069676	699.5159648	705.5075657	693.4804093	0.304018751	422.6390453	2660.005938	659.8871231	16.64078296	20.41823733	3.918578786	51.58948016
355.364681	403.6631125	320.5480257	436.9168941	498.1514477	3.016816958	220.7591689	913.0837055	0.287289101	511.1238708	512.2590532	667.8141583	1.552840734	145.485738	253.323482	2.255856662	71.2765057	52.17404085	59.36383331	500.9237588	216.078723	6.593436894	4.15015647	0.226875039	699.5272558	705.3268406	693.1615519	0.30405873	423.4983425	2657.55253	659.7834997	16.64402996	20.38087574	3.972810431	51.33889362
355.3604379	403.6605336	320.5420996	436.9136564	498.1470938	3.018137946	220.7522875	913.0852926	0.287271622	511.1588199	512.3294513	667.6816925	1.55396535	145.5128434	253.3090766	2.25586614	71.41774163	52.56534675	59.30784137	500.9177096	216.0797774	6.593074386	4.150475772	0.226660353	699.5518182	705.1653153	692.8499432	0.304088765	424.4905771	2655.208795	659.677124	16.64656457	20.02226404	3.895108518	51.40515326
355.3561848	403.657954	320.5361702	436.9104148	498.1427373	3.019462264	220.7454037	913.0868807	0.287254165	511.1855792	512.4072101	667.5514629	1.554187753	145.5470593	253.3215062	2.255879626	71.57305255	52.91443356	59.30469726	500.9158292	216.0810803	6.592884217	4.15067827	0.226433214	699.6135588	705.0583461	692.5815948	0.30410571	425.6918975	2653.46244	659.5689352	16.64768211	20.04267113	3.956242989	51.69293219
355.3519218	403.6553736	320.5302374	436.9071695	498.1383781	3.02078989	220.7385175	913.0884699	0.287236729	511.1955649	512.4898552	667.4226826	1.553257517	145.5958875	253.3794631	2.255898957	71.74403539	53.18146496	59.37098511	500.9178785	216.0822338	6.592880107	4.150687143	0.226206733	699.7337889	705.0294402	692.3791185	0.3041069	427.2460576	2652.895266	659.4562698	16.64628983	19.71838667	3.961897007	51.95501777
355.3476488	403.6527923	320.5243014	436.9039203	498.1340162	3.022120807	220.731629	913.0900601	0.287219314	511.1881288	512.5761151	667.2943542	1.551220223	145.6587889	253.4824452	2.255924407	71.93199926	53.36217465	59.50980878	500.9230212	216.0829376	6.593133526	4.150494368	0.225984304	699.8979555	705.0608501	692.2301015	0.304091927	429.0922651	2653.351084	659.3392873	16.64243379	19.44645069	3.943822238	51.85801067
355.3433659	403.6502103	320.5183621	436.9006673	498.1296516	3.023454994	220.7247381	913.0916514	0.28720192	511.1692604	512.6614801	667.1876303	1.547907343	145.7278969	253.6167452	2.255951174	72.1324353	53.45252611	59.69840566	500.9320329	216.0848326	6.593437809	4.150169366	0.225768676	700.1461432	705.2198768	692.2006654	0.304063212	430.957616	2654.761155	659.2374453	16.63701751	19.47363723	3.920305765	51.74321888
355.339073	403.6476275	320.5124195	436.8974104	498.1252844	3.024792432	220.7178449	913.0932436	0.287184547	511.1436775	512.7451925	667.1011484	1.543616791	145.7979802	253.767685	2.255978125	72.34908184	53.47246726	59.92637492	500.942617	216.0868195	6.593853129	4.149759663	0.225560866	700.4416109	705.45782	692.2492043	0.304023782	432.6240322	2656.434511	659.1538578	16.63087352	19.45791169	3.935472515	51.62626789
355.3347702	403.6450439	320.5064737	436.8941498	498.1209145	3.0261331	220.7109494	913.0948369	0.287167196	511.1203677	512.8297603	667.0190705	1.539134287	145.8605213	253.9077038	2.256005427	72.5911858	53.48003542	60.18212407	500.9500651	216.0859674	6.59463609	4.149343894	0.22535494	700.6769256	705.6263884	692.2430505	0.303978722	433.779787	2656.818972	659.0831421	16.62550414	19.45722331	3.865789514	51.54108877
355.3304574	403.6424596	320.5005246	436.8908853	498.1165419	3.027476979	220.7040516	913.0964312	0.287149865	511.1034263	512.9108886	666.9507328	1.53455461	145.9096996	254.0233684	2.256030153	72.85856134	53.47804736	60.44763981	500.9526535	216.0826137	6.595715668	4.14897613	0.225157505	700.8521425	705.7300178	692.190734	0.303931548	434.1626529	2655.530692	659.0366619	16.62170761	19.50309553	3.770902428	51.50867001
355.3261348	403.6398744	320.4945723	436.8876171	498.1121667	3.02882405	220.6971514	913.0980265	0.287132555	511.0888629	512.9800177	666.9137283	1.529531688	145.9462311	254.1204434	2.25604965	73.14667571	53.4221947	60.71350423	500.9499251	216.0786926	6.596903925	4.148646091	0.224987328	701.0252437	705.8503745	692.1723098	0.303883195	433.6644238	2653.100106	659.0288958	16.61921171	19.47227088	3.820198781	51.70421031
355.3218021	403.6372885	320.4886168	436.884345	498.1077889	3.030174292	220.6902491	913.0996228	0.287115267	511.0809101	513.0308553	666.9204087	1.524163229	145.9636308	254.1834955	2.256060158	73.4545989	53.31182368	60.95553042	500.9394703	216.0748948	6.598085237	4.148418832	0.224855049	701.2029809	706.0000752	692.2043905	0.303838522	431.9690074	2649.133615	659.0744753	16.6189248	19.60063897	3.912212897	51.63517885
355.3174596	403.6347018	320.482658	436.8810691	498.1034085	3.031527686	220.6833444	913.1012201	0.287097999	511.0860825	513.0549048	666.9929337	1.518454711	145.9526207	254.1918964	2.256055674	73.77869282	53.14351644	61.13738481	500.9192143	216.0728477	6.599016994	4.148391188	0.224773145	701.4172663	706.2294225	692.3385808	0.303803958	428.6635817	2643.294219	659.1967234	16.62208766	19.67182546	3.937626733	51.24378476
355.3131071	403.6321144	320.4766961	436.8777895	498.0990254	3.032884213	220.6764375	913.1028183	0.287080752	511.1026744	513.0506632	667.1316029	1.512464321	145.9137735	254.1463978	2.256035794	74.10815466	52.91598266	61.25131041	500.8897711	216.0727446	6.599637775	4.148562848	0.224746103	701.6696509	706.5442422	692.5837777	0.303780416	423.8241538	2635.764447	659.393733	16.62864728	19.77362568	3.961080374	50.68650032
355.3087446	403.6295261	320.4707311	436.874506	498.0946398	3.034243852	220.6695284	913.1044176	0.287063527	511.1265035	513.0265857	667.309159	1.506622581	145.8528859	254.0552938	2.256005409	74.42697476	52.66423533	61.31053943	500.8536236	216.0722522	6.600136421	4.148884185	0.224761941	701.8914466	706.8527923	692.856923	0.303765359	417.9150298	2626.617896	659.6360852	16.63802357	19.93727958	3.960507393	50.64528567
355.3043723	403.6269371	320.4647628	436.8712188	498.0902515	3.035606584	220.662617	913.1060179	0.287046322	511.150508	512.9873636	667.5110109	1.501012938	145.777413	253.9345002	2.255967841	74.7131108	52.3945949	61.32406996	500.814751	216.070817	6.600527325	4.149292119	0.224815761	702.0696139	707.1420274	693.1478255	0.303755623	411.4387471	2616.554807	659.9025095	16.64925097	20.0423956	3.969152611	50.41907582
355.29999	403.6243474	320.4587915	436.8679278	498.0858607	3.036972389	220.6557034	913.1076191	0.287029139	511.1607092	512.9399151	667.7169313	1.495524778	145.7020309	253.8183251	2.255928949	74.93583862	52.09701493	61.3163945	500.7799593	216.0681396	6.600826602	4.149653851	0.224901477	702.2079935	707.4222379	693.4668763	0.30374402	405.2368244	2607.013	660.1609095	16.66029302	19.9733644	3.835825017	50.62650794
355.2955978	403.6217568	320.452817	436.8646331	498.0814672	3.038341248	220.6487877	913.1092213	0.287011977	511.1514922	512.8909706	667.9064162	1.490444151	145.6336195	253.7182483	2.255892393	75.06974122	51.79714474	61.29143182	500.7531547	216.0629842	6.601061876	4.149923135	0.225010345	702.2727262	707.6508609	693.7756324	0.303728728	399.8594786	2598.512574	660.3848604	16.67038262	19.92857616	3.894564853	50.12551052
355.2911957	403.6191656	320.4468394	436.8613345	498.0770712	3.03971314	220.6418697	913.1108244	0.286994835	511.1255436	512.8416361	668.0742387	1.486184205	145.5697714	253.6225366	2.255856935	75.09468705	51.53142865	61.22233093	500.7350504	216.0548249	6.601108844	4.150155591	0.225140376	702.240157	707.799278	694.0492994	0.30371454	395.4212125	2590.918954	660.567606	16.68010767	19.95920372	3.928742382	50.36797397
355.2867836	403.6165735	320.4408587	436.8580322	498.0726727	3.041088047	220.6349496	913.1124286	0.286977715	511.0766835	512.8007294	668.1952401	1.483115305	145.5187384	253.5439582	2.255826844	74.97843564	51.33627808	61.1107279	500.7306019	216.0421477	6.600971298	4.150303724	0.225279364	702.0711359	707.8175349	694.2412163	0.303699823	392.6124861	2584.87483	660.676575	16.68858797	19.91886542	3.947606974	51.39818286
355.2823616	403.6139807	320.4348749	436.8547262	498.0682715	3.042465948	220.6280274	913.1140336	0.286960615	510.9978386	512.7815658	668.2324284	1.481785615	145.4910504	253.4979621	2.255808483	74.68418066	51.26667556	60.96426606	500.7458138	216.0223754	6.600731296	4.150304237	0.225407598	701.6984667	707.6165616	694.2672001	0.303681938	392.315924	2581.01432	660.6668976	16.69473331	19.82410544	4.108745681	51.77747891
355.2779298	403.6113872	320.428888	436.8514164	498.0638679	3.043846824	220.621103	913.1156397	0.286943537	510.89117	512.7861057	668.1839656	1.482287723	145.4865416	253.4817506	2.255802334	74.21651294	51.33272056	60.78534164	500.7808002	215.99616	6.600413654	4.150167338	0.225521102	701.1279326	707.1943935	694.1193253	0.303661759	394.5485647	2579.449457	660.5384368	16.69866384	19.65375309	4.004097081	51.67556318
355.273488	403.6087929	320.4228981	436.8481028	498.0594616	3.045230654	220.6141765	913.1172467	0.28692648	510.7624315	512.8094724	668.0717199	1.484173276	145.5010559	253.4907716	2.255806646	73.61876493	51.49347751	60.5941987	500.8321016	215.9668921	6.600102324	4.149904163	0.225625734	700.4311627	706.6251185	693.8541357	0.303638896	398.7779343	2580.242213	660.3214654	16.70074216	19.52928782	4.041358993	51.80956389
355.2690363	403.6061978	320.4169052	436.8447855	498.0550529	3.04661742	220.6072479	913.1188546	0.286909443	510.6220209	512.8469734	667.9174957	1.487199442	145.5264361	253.5083646	2.255818519	72.93777835	51.72763755	60.40030605	500.8947607	215.9375304	6.599881247	4.149573011	0.225725386	699.6626752	705.9572439	693.5033328	0.303615908	404.3227533	2582.995462	660.0494506	16.7020066	19.36356793	3.946725721	51.44245803
355.2645747	403.6036021	320.4109092	436.8414645	498.0506416	3.048007102	220.6003171	913.1204634	0.286892428	510.4892223	512.8868461	667.7652542	1.490963339	145.5451361	253.4985507	2.255830662	72.25006995	51.99745872	60.20401069	500.9590001	215.9127751	6.599809515	4.149307855	0.225832653	698.9113447	705.2764962	693.1295162	0.30359935	409.8464359	2586.665146	659.7864736	16.70469759	19.51081187	3.95589542	51.43274804
355.2601031	403.6010055	320.4049103	436.8381397	498.0462278	3.049399679	220.5933843	913.1220732	0.286875433	510.3738051	512.9269215	667.6344798	1.495123777	145.5512708	253.4503916	2.255841609	71.60934738	52.27804689	60.02831582	501.0205804	215.8958781	6.600029379	4.149142556	0.225946695	698.2417792	704.6385833	692.7658135	0.303589745	414.7411816	2591.077318	659.5639833	16.70952024	19.30559546	3.8415059	51.2327616
355.2556217	403.5984083	320.3989083	436.8348112	498.0418115	3.050795133	220.5864495	913.1236839	0.28685846	510.2762048	512.9775237	667.5105378	1.499693113	145.5508669	253.3744687	2.255856219	71.03174355	52.58527719	59.90759966	501.0817778	215.8873895	6.600738476	4.149027432	0.226048427	697.6621249	704.0300215	692.3814748	0.303583161	419.3035547	2596.796751	659.3694943	16.71578112	19.47794597	3.903359101	51.74752177
355.2511304	403.5958103	320.3929033	436.8314789	498.0373927	3.052193443	220.5795125	913.1252955	0.286841507	510.2086415	513.0374482	667.4157042	1.5042291	145.5372723	253.2587001	2.255873291	70.58680596	52.8901044	59.87548018	501.1375373	215.8911424	6.602144203	4.148997585	0.226133776	697.2508896	703.5159195	692.0119491	0.30357943	422.8047557	2603.608255	659.2404769	16.72426828	19.60041153	3.908562208	51.52600255
355.2466292	403.5932115	320.3868954	436.828143	498.0329714	3.053594589	220.5725736	913.1269081	0.286824576	510.1854546	513.1037156	667.3813645	1.508052149	145.5023473	253.0905076	2.255891079	70.36425335	53.14372449	59.97718387	501.1813179	215.9121501	6.60450579	4.14908646	0.226200404	697.115447	703.1919048	691.7160534	0.30357745	424.2844457	2611.27948	659.2270988	16.73585713	19.66605207	4.006478359	51.55506258
355.2421181	403.5906121	320.3808845	436.8248033	498.0285476	3.054998553	220.5656326	913.1285216	0.286807665	510.2062506	513.1769688	667.4075644	1.511028678	145.4425463	252.8794013	2.255909744	70.36857353	53.34182453	60.21444745	501.2122012	215.9499541	6.607758212	4.149284647	0.226244646	697.2652578	703.0694323	691.4988817	0.303577212	423.7219379	2619.696183	659.3296243	16.75030802	19.78745875	3.972801382	51.41720708
355.2375971	403.5880119	320.3748707	436.8214599	498.0241213	3.056405315	220.5586896	913.1301359	0.286790776	510.262527	513.2523703	667.4879864	1.513288623	145.3499494	252.6425378	2.255926765	70.54698068	53.49350794	60.53782852	501.2300444	216.0004933	6.611467589	4.149598359	0.226274561	697.6535953	703.1274264	691.3592632	0.303582881	421.3725776	2628.303211	659.5305075	16.76724503	19.7491451	4.051970756	52.03312213
355.2330662	403.5854109	320.368854	436.8181128	498.0196926	3.057814853	220.5517446	913.1317512	0.286773907	510.3409067	513.3303044	667.6035905	1.514974695	145.2223587	252.4109192	2.255942682	70.83570562	53.61442825	60.91026501	501.2375151	216.0588364	6.615239996	4.149980999	0.226290436	698.221563	703.3298743	691.2807109	0.30359536	417.865979	2636.970279	659.7953131	16.78546581	19.63716033	4.106031727	52.08078834
355.2285254	403.5828093	320.3628343	436.814762	498.0152614	3.05922715	220.5447976	913.1333673	0.286757059	510.4152579	513.4164307	667.7076543	1.516580108	145.0640877	252.2386796	2.255961076	71.10853427	53.75164499	61.27382594	501.2426596	216.1159955	6.618490957	4.150324781	0.226287521	698.8402805	703.5789447	691.2047314	0.303614218	414.669092	2645.914898	660.0471457	16.80250575	19.51068678	4.051798932	51.90741014
355.2239747	403.5802069	320.3568118	436.8114076	498.0108277	3.060642186	220.5378486	913.1349844	0.286740232	510.4738797	513.5068575	667.7912895	1.51807925	144.8673865	252.1551361	2.25598032	71.31021457	53.90567084	61.58482301	501.2457174	216.1669933	6.620759352	4.150603566	0.226271593	699.4626068	703.8585284	691.1347484	0.303641599	412.1312116	2654.604649	660.2637112	16.81744458	19.49876106	4.041864976	52.41699551
355.2194142	403.5776038	320.3507864	436.8080494	498.0063917	3.062059939	220.5308977	913.1366023	0.286723426	510.5211986	513.5923062	667.8815413	1.518822865	144.616182	252.1665119	2.255995769	71.47649535	54.02745502	61.83941181	501.2397617	216.2120183	6.621874531	4.150848034	0.226251204	700.1418302	704.2420354	691.1328185	0.30367935	409.4995819	2662.079244	660.4787435	16.83068998	19.62520349	4.018704579	51.79075868
355.2148438	403.575	320.3447581	436.8046875	498.0019531	3.063480392	220.5239448	913.1382212	0.286706641	510.5429358	513.6664353	667.9711108	1.518696316	144.2997156	252.308828	2.256004803	71.54252538	54.10972558	61.98358928	501.224403	216.2448834	6.621261412	4.151027522	0.226235822	700.8234619	704.7168526	691.2113451	0.303729957	407.1114717	2667.563634	660.6689223	16.84116204	19.7531873	3.992991625	51.7911288
355.2102634	403.5723955	320.3387269	436.8013219	497.9975122	3.064903524	220.51699	913.1398408	0.286689877	510.5211369	513.7196167	668.0520603	1.517628421	143.9040895	252.623068	2.256003281	71.42054228	54.14536951	61.94098761	501.199065	216.257684	6.618168146	4.151116872	0.22624106	701.4315106	705.2620338	691.385828	0.30379759	405.3692419	2670.000461	660.805478	16.847701	19.80917485	4.079754409	51.88115116
355.2056732	403.5697902	320.3326929	436.7979527	497.9930688	3.066329315	220.5100333	913.1414614	0.286673134	510.4558283	513.7492965	668.1276127	1.515542883	143.4345425	253.1064619	2.255990413	71.11600152	54.12566546	61.71213295	501.1632398	216.2495669	6.612656947	4.1511189	0.226270143	701.9600048	705.8773083	691.6669144	0.303881557	404.2002118	2669.145253	660.8904903	16.85019495	19.85855286	3.91308819	51.83740722
355.2010732	403.5671843	320.3266561	436.7945798	497.988623	3.067757747	220.5030747	913.1430828	0.286656412	510.353261	513.7634387	668.1865839	1.512810369	142.9221499	253.7283156	2.255970795	70.66136349	54.07522624	61.34499253	501.1216748	216.2229009	6.605400713	4.15102424	0.226312806	702.398512	706.5174124	692.0190344	0.303976469	403.8472497	2665.851432	660.9165334	16.84862631	19.80079716	3.956945685	52.24578877
355.1964632	403.5645776	320.3206165	436.7912032	497.9841748	3.069188798	220.4961141	913.1447051	0.286639711	510.2270974	513.7646924	668.237921	1.509519624	142.3922956	254.4446407	2.255946234	70.12650924	53.99281959	60.8953822	501.0750185	216.1820246	6.597147825	4.150865242	0.226364895	702.7776989	707.1790043	692.4398357	0.304078056	403.9605741	2660.551925	660.9049165	16.84378922	19.76410755	4.092162359	52.21130185
355.1918434	403.5619703	320.3145741	436.787823	497.9797242	3.070622449	220.4891518	913.1463283	0.286623031	510.1073119	513.7569972	668.31008	1.505598803	141.8793465	255.1742014	2.255918962	69.66424107	53.86125043	60.47312097	501.0214729	216.1370793	6.589221352	4.150719827	0.226418136	703.1980123	707.8967357	692.9433926	0.304179722	403.5197652	2653.948878	660.9145112	16.8376784	19.93327745	4.186923971	52.18381126
355.1872137	403.5593622	320.3085289	436.7844391	497.9752713	3.072058682	220.4821875	913.1479523	0.286606371	510.0028063	513.7440046	668.4013127	1.501362513	141.4168807	255.8741226	2.255891792	69.31868679	53.69291936	60.12585271	500.9644942	216.0908217	6.582380664	4.150602457	0.226469704	703.6525667	708.6325777	693.5096526	0.304276317	402.5188755	2646.642022	660.9493334	16.83069119	20.12670373	4.164429884	51.6189529
355.1825742	403.5567535	320.302481	436.7810515	497.9708159	3.073497475	220.4752214	913.1495771	0.286589732	509.9013743	513.7228295	668.4927131	1.497224731	141.0251277	256.5468528	2.255864929	69.02728402	53.50661146	59.82236048	500.909191	216.0379618	6.57659717	4.150483204	0.22653002	704.0432365	709.3091412	694.115447	0.304366409	401.6283001	2638.525963	660.9725308	16.82187064	19.84543495	4.047429209	51.68198901
355.1779248	403.554144	320.2964303	436.7776603	497.9663582	3.07493881	220.4682535	913.1512028	0.286573115	509.8125405	513.6975666	668.579827	1.493660357	140.7474296	257.1382223	2.255841827	68.83460938	53.32128072	59.61632005	500.8606239	215.9814894	6.57280059	4.150378591	0.22659777	704.3486987	709.8685791	694.7315596	0.304443687	400.9263416	2630.376175	660.9847105	16.81168103	19.71030361	4.08416192	51.56873164
355.1732655	403.5515339	320.2903768	436.7742654	497.9618981	3.076382666	220.4612837	913.1528293	0.286556518	509.7477853	513.6762402	668.6511231	1.491385379	140.6405409	257.5801011	2.255828152	68.79218442	53.171428	59.5793019	500.8265694	215.9254772	6.572197844	4.150300184	0.226667682	704.5371085	710.226568	695.307438	0.304499714	400.6667743	2623.438226	660.9802243	16.80060801	19.57155664	3.899134443	51.4883819
355.1685964	403.548923	320.2843207	436.7708669	497.9574357	3.077829024	220.4543122	913.1544567	0.286539942	509.7062314	513.6594336	668.700308	1.490534319	140.7078487	257.8655571	2.255824597	68.88931929	53.06602586	59.70861396	500.8088793	215.8706397	6.57479133	4.150245921	0.226740511	704.5912153	710.3623012	695.8225961	0.304532949	400.9691688	2617.894559	660.9520933	16.78880489	19.55799331	4.11835941	51.2724746
355.1639174	403.5463115	320.2782618	436.7674648	497.9529709	3.079277864	220.4473388	913.1560849	0.286523387	509.6898396	513.645339	668.7376637	1.490618114	140.9093197	258.0151264	2.255828944	69.12860498	52.98600316	59.98422829	500.8025981	215.8203146	6.579950878	4.15023189	0.226813314	704.5724894	710.3439456	696.2853994	0.30454594	401.3535256	2613.425686	660.9204817	16.77709514	19.16284254	3.889245764	51.10807749
355.1592286	403.5436993	320.2722002	436.764059	497.9485037	3.080729167	220.4403637	913.1577139	0.286506853	509.6894498	513.6318986	668.757302	1.491371303	141.2047255	258.068218	2.255839286	69.45412201	52.92853887	60.35285107	500.8057222	215.7741018	6.586751457	4.150241574	0.226886605	704.4843865	710.1995512	696.6846208	0.304541915	401.8794138	2609.685988	660.8764244	16.76551275	19.33451768	3.914070542	51.09984681
355.1545299	403.5410864	320.266136	436.7606496	497.9440343	3.082182912	220.4333868	913.1593437	0.286490339	509.6810218	513.6124232	668.7462572	1.492292622	141.5190326	258.1160111	2.255850835	69.73357971	52.88505631	60.69318833	500.8143048	215.7271678	6.593305548	4.150228234	0.226966337	704.3046052	709.9734786	697.0154079	0.304528953	402.863612	2605.649294	660.7916921	16.75338029	19.33615915	3.862224776	50.68730044
355.1498214	403.5384728	320.2600691	436.7572366	497.9395625	3.083639081	220.4264081	913.1609743	0.286473847	509.6619213	513.5873533	668.7022584	1.493135312	141.812084	258.1827767	2.255862614	69.9380385	52.85513579	60.97224289	500.8261817	215.6824898	6.598859821	4.150192101	0.227048962	704.0655962	709.7043926	697.2583804	0.304509321	404.1688366	2601.304704	660.6692911	16.74136536	19.18745809	3.940023537	51.07465911
355.145103	403.5358585	320.2539995	436.75382	497.9350884	3.085097653	220.4194277	913.1626057	0.286457375	509.6458714	513.5650879	668.6212833	1.494245894	142.0964816	258.2208346	2.25587875	70.11577558	52.86379204	61.24062454	500.8448249	215.6484871	6.603953298	4.15016195	0.227124358	703.8015032	709.374257	697.3607725	0.304478042	405.6384842	2597.855	660.5221283	16.73093337	19.44541328	3.95346049	50.95192261
355.1403747	403.5332436	320.2479273	436.7503997	497.930612	3.086558608	220.4124456	913.164238	0.286440925	509.6312477	513.5477534	668.4997631	1.49537725	142.3230515	258.2559222	2.255898672	70.23619667	52.91514232	61.46373357	500.8679616	215.6298738	6.607712035	4.150140815	0.227186148	703.5588585	709.0300774	697.2922764	0.30443775	407.1012117	2595.476773	660.3552388	16.72305593	19.47527553	3.91721741	50.7094522
355.1356367	403.530628	320.2418525	436.7469758	497.9261333	3.088021928	220.4054618	913.165871	0.286424495	509.6184289	513.5375668	668.3397327	1.496066789	142.4240139	258.3226283	2.255921044	70.27534418	53.00559134	61.60229543	500.8908789	215.6332535	6.609011699	4.150140664	0.227225104	703.4199766	708.7542148	697.0277688	0.304392581	408.146084	2594.276066	660.1850067	16.71910908	19.36239377	3.859577631	50.60426739
355.1308888	403.5280117	320.2357751	436.7435484	497.9216523	3.089487592	220.3984763	913.1675048	0.286408086	509.6098696	513.5360986	668.1431614	1.496334786	142.3967672	258.415512	2.255945593	70.23924409	53.13536988	61.66101911	500.9130976	215.6596174	6.607905929	4.15016527	0.22723786	703.3981097	708.5549108	696.5677884	0.30434276	408.7239323	2594.459557	660.0160757	16.71942056	19.4222158	3.834982069	50.92999561
355.126131	403.5253947	320.2296951	436.7401173	497.9171691	3.09095558	220.391489	913.1691394	0.286391697	509.5986597	513.5387211	667.9139355	1.496244588	142.2647104	258.5413716	2.255969352	70.10968924	53.28959	61.62885054	500.9340666	215.7005283	6.604691098	4.150190281	0.227231088	703.4399881	708.4105464	695.9641232	0.304290032	409.1435378	2595.469898	659.8354141	16.72272853	19.60162496	3.847023309	50.75434426
355.1213634	403.5227771	320.2236125	436.7366826	497.9126835	3.092425874	220.3845002	913.1707748	0.28637533	509.5892594	513.5448807	667.6613931	1.496006919	142.0689524	258.6718491	2.255991387	69.92232473	53.45865081	61.54108199	500.9541761	215.7517491	6.600257553	4.150216159	0.227205982	703.5223467	708.2970164	695.2603426	0.304233273	409.4826294	2597.320825	659.6463908	16.7285026	19.6808534	3.996987772	50.65043385
355.116586	403.5201588	320.2175273	436.7332444	497.9081957	3.093898452	220.3775096	913.172411	0.286358983	509.5946677	513.5558967	667.3990794	1.496215191	141.90333	258.7313172	2.256012578	69.76695472	53.63721599	61.49026458	500.9768986	215.8079704	6.59662314	4.150254251	0.227164253	703.5976672	708.1431716	694.5138185	0.304167141	409.8876527	2600.412178	659.4559803	16.73598584	19.63903728	3.803717963	50.60512572
355.1117988	403.5175398	320.2114396	436.7298025	497.9037057	3.095373296	220.3705175	913.1740479	0.286342657	509.6145479	513.5693011	667.1385721	1.496892375	141.7923431	258.7157003	2.256030099	69.65727722	53.80635855	61.48707839	501.0003111	215.8626909	6.594311656	4.150294301	0.227107561	703.6470866	707.9484456	693.7869772	0.304093615	410.450199	2604.399095	659.2656565	16.74432794	19.50837246	3.869025335	51.23878963
355.1070017	403.5149202	320.2053494	436.7263571	497.8992133	3.096850386	220.3635237	913.1756856	0.286326352	509.6430421	513.5829204	666.8903962	1.497530142	141.6865796	258.675155	2.256039277	69.55935891	53.94207045	61.48299958	501.0174962	215.9135897	6.592459879	4.1503245	0.227031336	703.7182056	707.7939822	693.1228071	0.304020371	410.9843373	2608.718063	659.0841969	16.75349985	19.44315438	3.808386924	50.78211112
355.1021948	403.5123	320.1992566	436.7229081	497.8947188	3.098329702	220.3565282	913.177324	0.286310068	509.6791631	513.5932764	666.6712672	1.498059435	141.6096065	258.6129414	2.256036037	69.48891984	54.01636868	61.48618144	501.0248671	215.9522429	6.591602199	4.150331317	0.226936987	703.7974967	707.6933883	692.6074444	0.303951088	411.5519519	2612.818398	658.9158619	16.76238017	19.49847898	3.779943601	50.97925953
355.0973781	403.509679	320.1931613	436.7194555	497.890222	3.099811225	220.3495312	913.1789633	0.286293805	509.7179646	513.5941412	666.5008007	1.498369719	141.5921128	258.5418272	2.256014709	69.45217187	53.99149976	61.49606255	501.0179336	215.9659845	6.592326285	4.15028915	0.226829357	703.8509101	707.6577641	692.3559352	0.303890913	412.327376	2615.764875	658.7597108	16.76684135	19.61608581	3.83617483	51.10766037
355.0925515	403.5070574	320.1870636	436.7159994	497.885723	3.101294934	220.3425326	913.1806032	0.286277562	509.7573857	513.5848335	666.3825179	1.498365905	141.6269961	258.4733717	2.255975302	69.44601228	53.86376174	61.50486849	500.9957811	215.9540371	6.594474415	4.150195671	0.226710248	703.8799693	707.6968598	692.3813596	0.303842463	413.2587064	2617.324086	658.6175546	16.76899754	19.61237204	3.753860141	51.14496622
355.0877151	403.5044352	320.1809633	436.7125397	497.8812218	3.10278081	220.3355324	913.1822439	0.286261341	509.8017746	513.5697259	666.3050429	1.498334949	141.722287	258.3808047	2.255924795	69.49174406	53.66625209	61.5390747	500.9645406	215.9242162	6.598125709	4.150072189	0.226583401	703.8729684	707.7610198	692.6114002	0.303802015	414.2657575	2618.067156	658.4885742	16.76963266	19.63750631	3.760990217	51.01879125
355.082869	403.5018123	320.1748606	436.7090764	497.8767183	3.104268833	220.3285307	913.1838854	0.28624514	509.8484613	513.5511966	666.256653	1.498245599	141.8488264	258.2764839	2.255868244	69.57191094	53.42419175	61.58224684	500.9273034	215.8836436	6.602563444	4.149928673	0.22645243	703.8352898	707.8401892	692.9787392	0.303770011	415.2252292	2618.145027	658.3697879	16.7694507	19.8653609	3.699384836	51.00462459
355.078013	403.4991888	320.1687555	436.7056096	497.8722127	3.105758984	220.3215274	913.1855276	0.286228959	509.8919097	513.533847	666.2144442	1.497887392	141.9305662	258.1964515	2.255813212	69.63735135	53.18036234	61.58583951	500.8877418	215.8465523	6.606092673	4.149782201	0.226319283	703.8030129	707.9457303	693.3524569	0.30374776	415.8580153	2617.891473	658.2575917	16.77012839	20.14271121	3.781076875	50.66489209
355.0731472	403.4965647	320.1626479	436.7021392	497.8677049	3.107251242	220.3145226	913.1871705	0.2862128	509.9306537	513.5195727	666.1679506	1.497346313	141.9597967	258.1402061	2.255765925	69.6883605	52.96119495	61.55171206	500.8504553	215.8189258	6.60837023	4.149644482	0.226190989	703.7615871	708.0436699	693.6726542	0.303734565	416.0797275	2617.401257	658.1478431	16.77201001	20.26882333	3.786641233	51.12760068
355.0682715	403.4939399	320.1565379	436.6986653	497.8631949	3.108745589	220.3075163	913.1888141	0.286196661	509.9622815	513.5047915	666.1254049	1.496731016	141.9777204	258.1003512	2.255727716	69.7516757	52.75858992	61.50322923	500.8169378	215.7947269	6.610028549	4.149508358	0.226078747	703.6581307	708.0938709	693.9879892	0.303731859	415.9910251	2616.04749	658.036534	16.77367873	20.31251656	3.712056225	50.93738025
355.0633861	403.4913144	320.1504255	436.6951879	497.8586827	3.110242005	220.3005085	913.1904585	0.286180543	509.9842624	513.4909691	666.074189	1.496154243	141.9809493	258.0760813	2.255706329	69.82947924	52.6036337	61.44463088	500.7931035	215.7803129	6.610719792	4.149386322	0.225993028	703.4655259	708.047887	694.2301234	0.303738608	415.5164902	2613.829232	657.9167759	16.77531032	20.40786189	3.641841161	50.96305901
355.0584909	403.4886883	320.1443107	436.6917069	497.8541683	3.111740469	220.2934991	913.1921036	0.286164446	509.9959841	513.4810844	665.9957288	1.495883303	141.9751852	258.0518232	2.255712611	69.93472677	52.54207688	61.39466658	500.7879767	215.785051	6.610213176	4.149299497	0.225946653	703.1450394	707.828543	694.2983521	0.303751288	414.579375	2610.982002	657.7794983	16.77731874	20.45036482	3.656428471	50.70811768
355.0535858	403.4860616	320.1381935	436.6882224	497.8496518	3.113240962	220.2864883	913.1937494	0.28614837	509.9970416	513.474052	665.890386	1.495972263	141.9674831	258.024997	2.255746566	70.06976871	52.57390588	61.36036038	500.801947	215.8078349	6.608637774	4.149252272	0.225943232	702.6896866	707.4283014	694.1978209	0.3037695	413.2435321	2607.497856	657.6239983	16.77951649	20.41494391	3.859927915	51.46322794
355.048671	403.4834343	320.132074	436.6847343	497.8451331	3.114743465	220.2794761	913.1953959	0.286132314	509.988017	513.4686071	665.7635031	1.496261498	141.9325581	258.0095775	2.255800965	70.20782346	52.67888379	61.32299577	500.8292144	215.845753	6.605805378	4.149246576	0.225974518	702.1503049	706.9111747	693.9598256	0.303794105	411.5918133	2603.662857	657.4574118	16.78237828	20.44062322	3.932229846	51.65277064
355.0437464	403.4808063	320.1259521	436.6812428	497.8406123	3.116247958	220.2724623	913.197043	0.286116279	509.9714003	513.4617641	665.6269315	1.496741717	141.8816088	258.0008832	2.25586782	70.34783789	52.82765743	61.29030355	500.8644488	215.8913494	6.602240254	4.149281536	0.226035425	701.5500412	706.3169358	693.6538566	0.303824837	409.8151951	2599.60962	657.2862758	16.78563111	20.30493603	3.860989592	52.28403892
355.038812	403.4781777	320.1198278	436.6777477	497.8360894	3.11775442	220.2654472	913.1986909	0.286100265	509.951407	513.4470472	665.5086064	1.497371075	141.8498918	257.9893972	2.255931736	70.49901515	52.9562798	61.2802531	500.8971367	215.9277992	6.599160457	4.149344537	0.226116585	700.9161134	705.7145874	693.4398604	0.303862527	408.2607964	2595.256265	657.1224298	16.7881946	20.06487639	3.935320106	51.87924865
355.0338677	403.4755485	320.1137013	436.6742491	497.8315643	3.119262833	220.2584306	913.2003395	0.286084272	509.930639	513.422444	665.413602	1.498153321	141.8359577	257.9711809	2.255985514	70.64897868	53.04477282	61.29468578	500.922825	215.9506395	6.596839272	4.149441172	0.226212137	700.2817915	705.1446613	693.3545892	0.303905332	407.1208149	2590.991429	656.9708487	16.79029446	19.88045107	3.962894297	51.94555854
355.0289137	403.4729187	320.1075724	436.670747	497.8270371	3.120773176	220.2514126	913.2019888	0.286068299	509.910219	513.3897931	665.3243395	1.499275874	141.8277261	257.9349104	2.256032856	70.78441157	53.12211888	61.33884316	500.9458241	215.9668532	6.594981271	4.149595076	0.226325855	699.6524557	704.5812086	693.3144852	0.303947839	406.4645671	2587.488521	656.826046	16.7929135	19.83684226	3.843203259	51.55529048
355.0239499	403.4702882	320.1014413	436.6672414	497.8225078	3.12228543	220.2443933	913.2036387	0.286052347	509.8940232	513.3471107	665.2438882	1.500786864	141.8237864	257.871222	2.256065435	70.88937432	53.1683184	61.41701177	500.9614726	215.9721089	6.593920635	4.149815708	0.226450239	699.068456	704.0677626	693.3504277	0.303986432	406.543246	2585.356883	656.6928023	16.7965049	19.56185688	3.849167964	51.02829276
355.0189763	403.4676572	320.0953079	436.6637323	497.8179764	3.123799575	220.2373725	913.2052894	0.286036416	509.8868059	513.2924902	665.1755646	1.502680383	141.8103698	257.774256	2.256072066	70.9353699	53.15734936	61.52495614	500.9629872	215.9618161	6.593882244	4.15011374	0.226572907	698.5938023	703.6736937	693.4966676	0.304017069	407.6376865	2585.421875	656.5783585	16.80189508	19.28594288	4.059631758	51.47463677
355.013993	403.4650255	320.0891722	436.6602197	497.8134429	3.125315592	220.2303504	913.2069406	0.286020505	509.8896882	513.2273332	665.1163826	1.504930257	141.7857695	257.6443754	2.256053185	70.91897344	53.09320408	61.65899816	500.9513568	215.9369791	6.594815136	4.150484671	0.22669026	698.2406673	703.4037694	693.7313634	0.304038041	409.7334894	2587.838226	656.4827923	16.80914382	19.09175732	3.774494299	51.40371787
355.0089998	403.4623932	320.0830343	436.6567036	497.8089074	3.126833461	220.2233269	913.2085926	0.286004616	509.901453	513.1538207	665.0729681	1.507352897	141.7672009	257.4933986	2.256012962	70.86177894	52.97495175	61.81269363	500.9290665	215.8961517	6.596789848	4.150895162	0.226799732	697.9916887	703.2474124	694.0604835	0.304052324	412.6055164	2591.913492	656.4066283	16.81703266	19.04500379	3.924831995	51.36233563
355.0039969	403.4597603	320.0768942	436.6531841	497.8043697	3.128353161	220.2163021	913.2102452	0.285988746	509.9202554	513.0766245	665.0392854	1.509796198	141.7535388	257.3348776	2.255959932	70.77397498	52.82542665	61.97141062	500.9020017	215.8444995	6.599393967	4.151320876	0.226900194	697.8324814	703.1777445	694.4221922	0.30406107	415.9525869	2597.228667	656.3463702	16.82503941	18.97463455	3.959386079	51.79570728
354.9989842	403.4571268	320.0707518	436.649661	497.79983	3.129874674	220.209276	913.2118985	0.285972898	509.9413751	513.0041172	664.9975888	1.512101692	141.7386436	257.1887465	2.255912764	70.67393991	52.7011635	62.11434554	500.8830254	215.794902	6.601711389	4.151732728	0.226996844	697.718241	703.1180453	694.6770312	0.304066023	419.2290672	2603.088985	656.2915994	16.8325823	19.02781943	4.039233694	52.00788791
354.9939617	403.4544927	320.0646072	436.6461345	497.7952882	3.13139798	220.2022485	913.2135524	0.28595707	509.9643546	512.9409509	664.9475813	1.514049788	141.7260231	257.069064	2.255877246	70.57386133	52.61224925	62.22453318	500.8760643	215.7497533	6.603507182	4.152095807	0.227082855	697.64579	703.0607973	694.7891206	0.304068644	422.1383994	2609.033458	656.2418793	16.83891837	19.13357894	3.94284531	51.82886093
354.9889294	403.451858	320.0584604	436.6426045	497.7907443	3.132923059	220.1952198	913.215207	0.285941263	509.9938237	512.8886362	664.8978956	1.515439702	141.7150579	256.9793936	2.255846301	70.46566828	52.53284951	62.28750313	500.8767431	215.7043078	6.60501668	4.152384456	0.22713941	697.6665664	703.0677223	694.7903947	0.304067433	424.6951951	2615.28745	656.2050893	16.84392066	19.10528265	3.878285734	51.55956358
354.9838874	403.4492227	320.0523115	436.6390711	497.7861985	3.134449891	220.1881898	913.2168622	0.285925477	510.0297952	512.8532029	664.8492025	1.51597494	141.7081061	256.937392	2.255826147	70.36287931	52.47223487	62.27959574	500.8891779	215.6612355	6.605950732	4.152552911	0.227155469	697.7829227	703.1376597	694.6409324	0.304064238	426.5255044	2621.314709	656.1817297	16.84674111	19.10332976	3.920231067	51.73702526
354.9788356	403.4465868	320.0461604	436.6355342	497.7816505	3.135978457	220.1811585	913.2185181	0.285909711	510.0717751	512.8414808	664.8064878	1.515268257	141.7139251	256.9661641	2.255824201	70.28840065	52.4364093	62.1733629	500.917867	215.6222088	6.606056443	4.152540328	0.227118204	697.9901813	703.2685243	694.3116335	0.304062755	427.1519419	2626.251529	656.1731651	16.84603138	19.04449574	3.938654643	51.75512094
354.973774	403.4439503	320.0400071	436.6319938	497.7771006	3.137508736	220.1741259	913.2201745	0.285893966	510.1190828	512.8530754	664.7700738	1.513313963	141.731984	257.0641404	2.255839512	70.24602673	52.41972925	61.97188032	500.9611849	215.5871285	6.605369296	4.152344872	0.227027032	698.2841224	703.4603013	693.8152086	0.304062969	426.5427339	2630.031249	656.1786336	16.84188153	19.07078573	4.007446809	51.58333437
354.9687027	403.4413132	320.0338518	436.62845	497.7725486	3.13904071	220.1670921	913.2218316	0.285878242	510.1670265	512.8825404	664.7295669	1.510472034	141.7554258	257.2126953	2.255871943	70.23581906	52.42987347	61.70720505	501.0171309	215.5591911	6.603877981	4.152016752	0.226902344	698.6203021	703.6649907	693.160379	0.304063491	424.8808648	2632.863193	656.1892386	16.83537235	19.09876931	4.058497424	51.75449197
354.9636216	403.4386755	320.0276943	436.6249027	497.7679946	3.140574358	220.1600571	913.2234894	0.285862538	510.2131836	512.922563	664.6835828	1.507071647	141.7817621	257.3896337	2.255914548	70.25476335	52.44999826	61.4134293	501.0788766	215.5362758	6.601922086	4.151603144	0.226757938	698.9760295	703.8708822	692.4103128	0.304062774	422.4731454	2635.086725	656.2012864	16.82755011	19.11220036	3.844037018	51.92801925
354.9585308	403.4360373	320.0215347	436.621352	497.7634386	3.142109661	220.1530209	913.2251477	0.285846855	510.2563215	512.9598561	664.6336665	1.50367335	141.806161	257.5544245	2.255950752	70.28641411	52.44014877	61.14645069	501.1326167	215.51164	6.60026215	4.1511877	0.226611883	699.3408452	704.0891239	691.6911675	0.304056894	419.9939029	2637.617504	656.2129116	16.82032905	19.03740455	3.916449161	52.16212354
354.9534302	403.4333984	320.015373	436.6177979	497.7588806	3.143646599	220.1459834	913.2268066	0.285831193	510.2915259	512.9872954	664.5756285	1.500628845	141.8246005	257.6865759	2.25597712	70.33491096	52.39257466	60.94260521	501.1729897	215.4856547	6.599075352	4.150819797	0.226483738	699.6683462	704.2830495	691.0549326	0.304045778	417.6518127	2640.549937	656.2170952	16.81473923	19.02505149	3.855331338	52.07336826
354.9483198	403.430759	320.0092092	436.6142403	497.7543206	3.145185153	220.1389448	913.2284662	0.285815551	510.3126562	513.0053895	664.5070369	1.497918424	141.837642	257.7914525	2.256000631	70.42527137	52.31771516	60.80721427	501.2015252	215.462652	6.598091631	4.150491994	0.226383481	699.900662	704.4008804	690.4997397	0.304033708	415.1427198	2643.092559	656.2068458	16.8105279	19.03224004	3.900182778	52.06523925
354.9431997	403.428119	320.0030434	436.6106793	497.7497587	3.146725302	220.131905	913.2301263	0.28579993	510.3128289	513.0052177	664.4235418	1.495972692	141.8406809	257.8450556	2.256017831	70.56573013	52.20663763	60.78544209	501.2117316	215.4432682	6.597503653	4.150264839	0.226336967	699.9725779	704.3917224	690.0938111	0.30402165	412.6919431	2645.236398	656.1731262	16.80889564	18.96039907	3.900323262	52.14599858
354.9380699	403.4254784	319.9968755	436.6071148	497.7451947	3.148267027	220.124864	913.2317871	0.28578433	510.282761	512.9754175	664.3168336	1.495381045	141.826559	257.816416	2.256025877	70.76543824	52.05541155	60.93606048	501.1966953	215.4295875	6.597478318	4.150221474	0.22638035	699.7954729	704.1803183	689.9094084	0.304010668	410.5969621	2647.002976	656.1030349	16.81144433	19.0477486	3.955278452	52.08316537
354.9329303	403.4228373	319.9907056	436.603547	497.7406288	3.149810309	220.1178219	913.2334484	0.28576875	510.2221999	512.9164632	664.1876715	1.496174523	141.7969253	257.7111188	2.256025806	71.02303207	51.86918032	61.25723932	501.1573818	215.4223326	6.597960645	4.150362093	0.226513999	699.36586	703.7667229	689.9508103	0.304001848	408.8621221	2648.24412	655.9956786	16.81787267	19.12762351	3.871774682	51.80743585
354.9277809	403.4201956	319.9845337	436.5999757	497.736061	3.151355127	220.1107787	913.2351104	0.285753191	510.1407384	512.8351332	664.044679	1.498101503	141.7591112	257.5531662	2.256015209	71.31127536	51.64997149	61.70893732	501.0978462	215.4180819	6.598989123	4.150645777	0.22670986	698.7727438	703.2365007	690.1933561	0.30399332	407.5735312	2649.267743	655.8620519	16.82686857	19.14662521	3.980294783	51.73078913
354.9226218	403.4175533	319.9783598	436.5964011	497.7314912	3.152901462	220.1037343	913.2367729	0.285737653	510.0459645	512.7414006	663.8940155	1.500801408	141.72084	257.3778929	2.255998569	71.61356964	51.41664057	62.24047331	501.0265477	215.4170695	6.600291892	4.151013787	0.226940814	698.0858696	702.6508393	690.575996	0.303985557	406.5737868	2649.926727	655.7105978	16.83662324	19.14121093	4.021995233	51.88247117
354.917453	403.4149104	319.9721839	436.592823	497.7269195	3.154449294	220.0966888	913.238436	0.285722135	509.9501104	512.654937	663.7457804	1.503487773	141.6955062	257.2512939	2.255987279	71.91255355	51.20521125	62.75521568	500.959942	215.4210595	6.601251753	4.151343145	0.22715724	697.4186143	702.1041775	690.9686738	0.303980375	405.3677604	2649.69844	655.555862	16.84378667	19.03163721	3.913334908	51.91853915
354.9122744	403.412267	319.966006	436.5892415	497.7223458	3.155998603	220.0896423	913.2400996	0.285706637	509.8619329	512.5839491	663.6076497	1.505902502	141.6913485	257.2054556	2.255982828	72.18200604	51.0309892	63.20745722	500.9052616	215.428588	6.601728945	4.151589914	0.227333347	696.8508114	701.6703737	691.3281695	0.303977557	403.9771513	2648.672554	655.4075818	16.84664934	18.95631741	3.993469953	51.35266509
354.9070861	403.4096231	319.9598262	436.5856566	497.7177702	3.157549371	220.0825947	913.2417638	0.285691161	509.7819336	512.523668	663.4809497	1.508394139	141.7093367	257.2350327	2.255980609	72.40132932	50.89552618	63.61446898	500.8607433	215.4378958	6.601916447	4.151799893	0.227479249	696.383706	701.359095	691.6982681	0.303976967	402.8217707	2647.197158	655.2649391	16.84539222	19.03009081	3.942295913	51.82445843
354.9018881	403.4069785	319.9536444	436.5820684	497.7131927	3.159101576	220.075546	913.2434286	0.285675705	509.7209404	512.4835526	663.3750985	1.510685269	141.7595663	257.37846	2.255982111	72.53562006	50.81856659	63.92206854	500.8353231	215.4469203	6.601661217	4.151925369	0.227565074	696.1156601	701.260965	692.0277575	0.303978299	401.982013	2645.447	655.1400315	16.83797014	19.18987875	3.84042485	51.5078623
354.8966803	403.4043334	319.9474607	436.5784767	497.7086133	3.1606552	220.0684962	913.2450939	0.285660269	509.6941034	512.4755583	663.3030155	1.512402468	141.8548898	257.6826288	2.255987345	72.53677381	50.82016244	64.06008543	500.8395597	215.4517642	6.600850755	4.151904339	0.227549681	696.1852388	701.5038073	692.2537009	0.303980097	401.6063404	2643.812722	655.0501151	16.82188442	19.25385812	3.826876408	51.77268846
354.8914628	403.4016878	319.9412751	436.5748817	497.7040319	3.162210223	220.0614454	913.2467598	0.285644854	509.7017676	512.4998372	663.2693008	1.513501006	141.9935158	258.1331743	2.255995333	72.40172497	50.89938677	64.02642464	500.873208	215.4516599	6.599546812	4.151744118	0.227433953	696.5909286	702.0827899	692.3807858	0.303981744	401.7754975	2642.377194	654.9996917	16.79786407	19.25112655	3.926723132	51.48144529
354.8862356	403.3990416	319.9350875	436.5712833	497.6994487	3.163766624	220.0543936	913.2484262	0.28562946	509.735601	512.5541429	663.275252	1.513818505	142.1640401	258.6799462	2.256008311	72.16777111	51.04393664	63.84113332	500.9316971	215.449008	6.597755628	4.151457015	0.227234715	697.249093	702.9071805	692.4179656	0.30398323	402.2253557	2640.756395	654.9887648	16.76855278	19.31210466	4.047798921	51.74692021
354.8809987	403.3963949	319.9288981	436.5676815	497.6948636	3.165324385	220.0473408	913.2500932	0.285614086	509.7854347	512.6302018	663.3213172	1.513465505	142.3522975	259.2538588	2.256023364	71.86738407	51.23089875	63.55080005	501.0057113	215.4444255	6.595737338	4.151097654	0.226981684	698.058016	703.8743828	692.4193871	0.303983488	402.970076	2638.893159	655.0152651	16.73747583	19.26786264	3.869254507	51.36838234
354.875752	403.3937476	319.9227068	436.5640763	497.6902767	3.166883486	220.040287	913.2517607	0.285598733	509.830489	512.7083761	663.4021642	1.512929077	142.5329408	259.7341592	2.256033533	71.5591768	51.41639144	63.26239964	501.0758589	215.4393155	6.594031664	4.15079117	0.226739341	698.8152554	704.789771	692.5115018	0.303981232	404.1526402	2636.744844	655.0677641	16.71072063	19.23685605	3.839938628	51.49686718
354.8704956	403.3910997	319.9165137	436.5604678	497.6856879	3.168443906	220.0332322	913.2534287	0.285583401	509.8625345	512.7841283	663.5211195	1.512098097	142.6919619	260.0531156	2.256037725	71.27632525	51.58033576	63.00466622	501.1352015	215.4342748	6.592818401	4.150568519	0.226528583	699.4362551	705.5595216	692.7189496	0.303974855	405.6665299	2634.218843	655.149049	16.69163273	19.21218091	4.006448632	51.86476975
354.8652295	403.3884514	319.9103187	436.556856	497.6810972	3.170005626	220.0261765	913.2550973	0.285568089	509.8888099	512.8669102	663.6912437	1.510407225	142.8296703	260.2040606	2.256037636	71.00820068	51.7276725	62.72820326	501.1894326	215.4271827	6.592027108	4.150379408	0.226324778	699.9816707	706.2215128	692.9782334	0.303961822	407.3959178	2631.478861	655.277283	16.68042199	18.8240771	3.987997114	51.87132695
354.8599537	403.3858025	319.9041219	436.5532407	497.6765046	3.171568627	220.0191198	913.2567664	0.285552797	509.9001658	512.9520944	663.9172162	1.50765658	142.9288956	260.104087	2.256031935	70.79449608	51.83331217	62.46331463	501.2305342	215.4184001	6.591878403	4.150255147	0.226150413	700.3569976	706.6666492	693.3101902	0.303939612	409.190893	2628.468395	655.4575998	16.6811968	18.86239376	3.902990297	51.58702818
354.8546682	403.383153	319.8979232	436.5496222	497.6719102	3.173132889	220.0120621	913.258436	0.285537527	509.884278	513.0345377	664.2032601	1.503550972	142.9679426	259.6523324	2.256020483	70.69149573	51.86652195	62.24696018	501.2487871	215.4093038	6.592581595	4.150226549	0.22603323	700.4372132	706.7511622	693.7327331	0.303905486	410.7529063	2624.980995	655.6948643	16.69904053	18.52013668	3.798951335	51.46197855
354.8493729	403.380503	319.8917228	436.5460003	497.667314	3.174698392	220.0050036	913.2601061	0.285522276	509.8420547	513.114103	664.545176	1.498128021	142.9463106	258.8563273	2.25600389	70.7031575	51.82618076	62.07697219	501.2446011	215.4000897	6.594099191	4.15028308	0.225973367	700.2290864	706.4790491	694.2267075	0.303859162	412.0298585	2621.071419	655.9866999	16.7337679	18.49592018	4.01492647	51.44402225
354.844068	403.3778525	319.8855206	436.542375	497.662716	3.176265116	219.9979441	913.2617767	0.285507047	509.776471	513.1855238	664.922516	1.492089406	142.8743139	257.7892209	2.255981636	70.81376423	51.72240859	61.96858032	501.2193926	215.3918176	6.596320383	4.150429814	0.225976225	699.7666261	705.9070529	694.7970518	0.303803451	413.2075873	2616.87018	656.3118326	16.78209093	18.52913429	4.009744786	51.69378579
354.8387533	403.3752015	319.8793166	436.5387464	497.6581161	3.177833043	219.9908837	913.2634478	0.285491837	509.6972	513.2513634	665.3186957	1.485828747	142.7681246	256.552689	2.255956247	70.99449009	51.57745785	61.89618109	501.1810925	215.3850958	6.598946341	4.150621682	0.226024367	699.1469934	705.1455273	695.3929199	0.30374085	414.3383338	2612.504682	656.6561395	16.83927168	18.68591363	3.90573784	51.757663
354.833429	403.3725499	319.8731108	436.5351145	497.6535145	3.17940215	219.9838224	913.2651194	0.285476649	509.6264876	513.3222956	665.7137874	1.479766302	142.66133	255.3370389	2.25593282	71.17514956	51.44060807	61.7837049	501.1482777	215.379642	6.601392085	4.150755274	0.226068483	698.5906212	704.4328134	695.9045786	0.303675364	415.5408612	2608.248188	657.0048635	16.89597743	18.90966642	4.120132852	52.07363652
354.8280949	403.3698979	319.8669033	436.5314792	497.648911	3.180972421	219.9767603	913.2667915	0.285461481	509.5698379	513.3958946	666.0834408	1.47452163	142.5668869	254.2376977	2.255913089	71.34086399	51.32602294	61.63150698	501.1250686	215.377078	6.603413474	4.150805588	0.226105067	698.1576156	703.8480029	696.301174	0.303609801	416.852232	2604.194421	657.3352659	16.9475644	19.21955334	4.026628975	52.36429458
354.8227512	403.3672452	319.8606941	436.5278407	497.6443057	3.182543834	219.9696973	913.2684641	0.285446333	509.51754	513.4614597	666.4068767	1.470532784	142.4746824	253.2380636	2.255896893	71.5355332	51.21218554	61.49498012	501.1029626	215.3803805	6.605074272	4.150802072	0.226166238	697.7589797	703.3081968	696.6011131	0.303544334	418.0844923	2600.232837	657.6269305	16.9950832	19.5571383	4.064812117	52.48004347
354.8173977	403.3645921	319.8544832	436.5241988	497.6396987	3.184116369	219.9626335	913.2701371	0.285431206	509.4750402	513.5148961	666.651377	1.468605703	142.3999087	252.4553729	2.255886512	71.74636738	51.11423959	61.3813467	501.0860461	215.3920502	6.606072196	4.1507163	0.226250794	697.4579848	702.9015014	696.7693992	0.303482532	419.2431934	2596.437154	657.849016	17.03274882	19.88495258	3.943126008	52.69703992
354.8120346	403.3619385	319.8482705	436.5205536	497.6350899	3.185690008	219.9555688	913.2718107	0.285416099	509.44807	513.5492354	666.7746876	1.469868754	142.3620961	252.0374176	2.255883977	71.95586128	51.05086626	61.3089496	501.0783779	215.4153312	6.606062143	4.150525841	0.22636151	697.3249658	702.7348277	696.7799881	0.303429368	420.4024178	2592.893116	657.9602039	17.05319198	20.16104144	4.074600085	52.59712879
354.8066618	403.3592843	319.8420562	436.5169051	497.6304793	3.187264731	219.9485033	913.2734847	0.285401013	509.4346893	513.562085	666.7726893	1.474339263	142.36274	251.9928552	2.25588925	72.16335695	51.02093011	61.28761253	501.0786539	215.4498653	6.605057365	4.150239069	0.226500407	697.3538585	702.802883	696.6374019	0.303386475	421.5000651	2589.644497	657.9565924	17.05585136	20.36051494	3.965920845	52.87247364
354.8012793	403.3566297	319.8358402	436.5132533	497.6258669	3.188840517	219.941437	913.2751592	0.285385948	509.435997	513.5613122	666.6764079	1.481062228	142.4022787	252.2733643	2.255901571	72.34226651	51.02931258	61.28038127	501.0891595	215.4907136	6.603208691	4.149857443	0.226643307	697.5687834	703.1047483	696.3432982	0.303354266	422.4976476	2586.836985	657.8694511	17.04278014	20.49421359	4.008335045	52.47923293
354.7958871	403.3539745	319.8296226	436.5095982	497.6212528	3.190417347	219.9343699	913.2768341	0.285370903	509.4441585	513.5478097	666.5140464	1.489184025	142.4706351	252.7824397	2.255918458	72.49504298	51.06239623	61.29102808	501.1045144	215.5339426	6.600843507	4.149423307	0.226789781	697.9098969	703.5563077	695.9407468	0.303332662	423.3009701	2584.519434	657.7253964	17.01864053	20.55999699	3.928876533	52.54157552
354.7904852	403.3513188	319.8234033	436.5059398	497.616637	3.191995202	219.9273021	913.2785095	0.285355878	509.4408111	513.5210146	666.337044	1.497199803	142.5395767	253.3030567	2.255934884	72.65239401	51.08231529	61.3434721	501.1110496	215.5738498	6.598637333	4.149025797	0.226953843	698.2155449	703.949265	695.5202799	0.30331913	423.7052671	2582.658184	657.5725271	16.99405073	20.799541	3.948922508	52.8754145
354.7850736	403.3486626	319.8171824	436.5022781	497.6120194	3.193574062	219.9202335	913.2801853	0.285340874	509.4219791	513.4845997	666.1747361	1.504215234	142.6071293	253.7715544	2.255948981	72.79567922	51.08725184	61.42447579	501.1070849	215.6056902	6.596835344	4.148693914	0.227121856	698.4703388	704.2472035	695.1157337	0.303315104	423.6564399	2581.344266	657.4384835	16.97182482	20.7949154	4.038644366	52.08479744
354.7796523	403.3460059	319.8109598	436.4986131	497.6074001	3.195153906	219.9131641	913.2818616	0.285325891	509.393685	513.4398222	666.0187522	1.510381318	142.6943957	254.2847097	2.255961776	72.87785818	51.10251815	61.51713184	501.0987828	215.6279364	6.59525511	4.148413292	0.227271534	698.7634779	704.5548124	694.7195221	0.303326343	423.2174848	2580.715005	657.3142196	16.94691051	20.81560931	4.086043977	52.4821634
354.7742214	403.3433487	319.8047357	436.4949449	497.602779	3.196734716	219.9060941	913.2835383	0.285310928	509.3516639	513.391564	665.9053781	1.514618694	142.8012819	254.7727904	2.255970955	72.87028818	51.12911753	61.60324945	501.0847731	215.6346919	6.594182591	4.148219675	0.227383693	699.0842692	704.838487	694.3772866	0.303355139	422.3500335	2580.868601	657.2332728	16.92230363	20.68807505	3.8841044	52.40494668
354.7687808	403.3406911	319.79851	436.4912734	497.5981563	3.198316471	219.8990233	913.2852155	0.285295985	509.2929673	513.3490187	665.8859815	1.515436061	142.9287823	255.1467884	2.255973833	72.72949313	51.17237633	61.64482094	501.0654085	215.6179615	6.593959571	4.148147824	0.227426717	699.4383408	705.0716169	694.1375745	0.30340382	421.0357193	2581.943191	657.2438158	16.90173789	20.47034406	3.929787731	52.44822366
354.7633305	403.3380329	319.7922827	436.4875986	497.5935319	3.199899152	219.8919517	913.2868931	0.285281063	509.2191041	513.3141884	665.9619627	1.512843675	143.0788587	255.4108335	2.255970735	72.45119995	51.23441442	61.63671932	501.0422867	215.5778043	6.594571375	4.148195401	0.227395768	699.8277088	705.2644698	694.0053709	0.30347201	419.3388065	2583.921415	657.3464973	16.88492546	20.34215004	4.106709466	52.88900216
354.7578706	403.3353742	319.7860539	436.4839205	497.5889057	3.20148274	219.8848795	913.2885711	0.285266161	509.1291355	513.2841167	666.1129227	1.50758805	143.2379031	255.5454585	2.255962909	72.08997395	51.29502298	61.60763884	501.01288	215.519991	6.595955325	4.148353675	0.227318113	700.1762064	705.3638622	693.9727678	0.303553352	417.3352214	2586.59086	657.5217113	16.87324294	20.27097262	4.039071408	52.26547885
354.752401	403.3327151	319.7798235	436.4802392	497.5842779	3.203067214	219.8778067	913.2902495	0.28525128	509.0296641	513.2582437	666.3072709	1.500738814	143.4061757	255.6110135	2.25595326	71.67434027	51.35309131	61.5667779	500.9810151	215.4508684	6.597823427	4.148583021	0.227206349	700.4830155	705.406563	694.0045168	0.303643533	415.1893094	2589.788833	657.7392295	16.8641064	20.06038808	3.966342142	52.22694466
354.7469217	403.3300554	319.7735916	436.4765546	497.5796484	3.204652554	219.8707331	913.2919283	0.285236419	508.9350984	513.2331434	666.4745641	1.494525576	143.593081	255.7771204	2.255947723	71.24191219	51.41744691	61.53101351	500.9554555	215.3823285	6.599514467	4.148799159	0.22708074	700.7932015	705.5099301	694.018435	0.30373763	413.1736661	2593.284633	657.9320208	16.8499505	19.91890755	3.94572367	52.23969478
354.7414327	403.3273953	319.7673582	436.4728668	497.5750172	3.206238742	219.8636589	913.2936076	0.285221579	508.8496099	513.2099003	666.5953379	1.489768856	143.7905994	256.0494369	2.255948346	70.83352943	51.47778461	61.5101201	500.938034	215.3204117	6.600868125	4.148974939	0.22695764	701.0661792	705.6650498	693.9967177	0.303828861	411.4777934	2596.846363	658.0809317	16.83090062	19.93341103	3.989130794	52.00489687
354.7359341	403.3247347	319.7611232	436.4691757	497.5703843	3.207825757	219.8565841	913.2952873	0.285206759	508.7707254	513.1969568	666.7062084	1.485691875	143.9845583	256.3071053	2.255953473	70.45990679	51.5205221	61.48631254	500.9275396	215.2631653	6.602167245	4.14913266	0.226831239	701.2336911	705.794006	693.9825093	0.30391178	410.2362516	2600.33614	658.2192766	16.81266017	19.91932133	4.058229157	52.01550963
354.7304259	403.3220736	319.7548868	436.4654814	497.5657498	3.20941358	219.8495086	913.2969673	0.28519196	508.7036528	513.1970399	666.7887482	1.483199362	144.1630719	256.5407571	2.255965372	70.17215909	51.53191888	61.46707926	500.9262895	215.2177934	6.603246285	4.149239881	0.226720663	701.2406252	705.878008	693.9574376	0.303977161	409.7076961	2603.445547	658.3286001	16.79611477	19.82741903	4.218848626	52.0074394
354.724908	403.3194121	319.748649	436.4617838	497.5611137	3.211002191	219.8424326	913.2986478	0.285177181	508.6529352	513.2119371	666.8185363	1.483459765	144.3065527	256.7218167	2.25598663	70.04691388	51.48830396	61.47072268	500.9351675	215.1938915	6.603933214	4.14926101	0.226657622	700.9956155	705.8681749	693.8998334	0.304012532	410.1837831	2605.763962	658.3847817	16.78326973	19.61609981	3.869993006	52.25329851
354.7193804	403.31675	319.7424096	436.4580831	497.5564759	3.21259157	219.8353559	913.3003286	0.285162422	508.6201617	513.2425649	666.8008784	1.486388071	144.40946	256.8264355	2.256015828	70.08923878	51.38907091	61.49466964	500.9536211	215.1915764	6.604237938	4.149197222	0.226643183	700.4993452	705.7571627	693.816247	0.304016759	411.6747699	2607.180118	658.3918038	16.7753363	19.31980419	4.073767986	52.12029299
354.7138432	403.3140875	319.7361689	436.454379	497.5518365	3.214181698	219.8282787	913.3020099	0.285147684	508.6088333	513.2836349	666.7307332	1.491794649	144.4838203	256.9234086	2.256050066	70.25582175	51.25860384	61.53546041	500.981682	215.2073227	6.604034323	4.149050765	0.226664491	699.8637139	705.6268203	693.697425	0.303998885	413.9476533	2607.802012	658.3442271	16.76892291	19.15481196	4.066507325	51.99145749
354.7082963	403.3114245	319.7299267	436.4506718	497.5471955	3.215772555	219.8212009	913.3036915	0.285132967	508.6174006	513.3324663	666.6306779	1.498742191	144.5320425	256.9931821	2.25608426	70.50502786	51.11154687	61.58473821	501.0158208	215.2345452	6.603458705	4.148853453	0.226706519	699.1570481	705.4932114	693.568217	0.303966819	416.7337022	2607.725149	658.2624377	16.76474168	19.11379777	3.883374937	52.26802546
354.7027398	403.3087611	319.7236831	436.4469614	497.5425528	3.217364121	219.8141225	913.3053735	0.285118269	508.6389906	513.3870751	666.559073	1.5050281	144.5593711	256.9640824	2.256109352	70.75104028	50.97084809	61.61913016	501.0491021	215.2586736	6.60293036	4.148680062	0.226733988	698.4783036	705.3563005	693.4930063	0.303935138	419.5526356	2607.231949	658.2005044	16.76556226	19.10408309	3.925023936	52.24026611
354.6971736	403.3060972	319.7174381	436.4432477	497.5379086	3.218956376	219.8070436	913.3070558	0.285103592	508.6750172	513.4422964	666.5229726	1.51014985	144.5689301	256.852713	2.256120645	70.95943438	50.85432024	61.63613367	501.0787164	215.2752619	6.60243982	4.148546071	0.226738324	697.9176828	705.2585188	693.4753425	0.3039117	422.1281924	2606.369663	658.1642242	16.77056124	19.12750226	4.01735668	52.08569725
354.6915978	403.3034328	319.7111917	436.4395308	497.5332627	3.220549301	219.7999642	913.3087385	0.285088936	508.7327415	513.4933603	666.4922518	1.515084282	144.5511104	256.6947169	2.256117643	71.16750532	50.7611003	61.65226018	501.1045668	215.2904163	6.601695724	4.148417226	0.226742437	697.4962402	705.2255871	693.476229	0.303893018	424.4782978	2604.85409	658.1242189	16.77865683	19.2095663	3.973313258	51.97535301
354.6860124	403.300768	319.7049439	436.4358107	497.5286153	3.222142876	219.7928843	913.3104216	0.2850743	508.8140992	513.5328284	666.4713022	1.519332401	144.5085913	256.5150836	2.256094649	71.33829835	50.71209456	61.66780927	501.1228463	215.2993596	6.600658751	4.14830902	0.226739716	697.3250382	705.3094092	693.4931594	0.303888452	426.2508815	2602.731674	658.0838362	16.78869916	19.31514786	3.91425533	52.21670771
354.6804173	403.2981027	319.6986948	436.4320874	497.5239662	3.223737082	219.7858038	913.3121051	0.285059684	508.9221207	513.5499556	666.4583081	1.522402216	144.4500893	256.3778651	2.256045132	71.41781464	50.73830313	61.68454254	501.1296189	215.2961197	6.599217329	4.148235793	0.226720139	697.5636485	705.5988252	693.5135571	0.303911486	426.9781151	2600.122919	658.0407535	16.79764485	19.31990684	3.943354937	52.39584232
354.6748126	403.295437	319.6924444	436.428361	497.5193156	3.225331898	219.7787229	913.3137888	0.285045089	509.055544	513.543655	666.4482328	1.524373315	144.3778469	256.2968681	2.255970407	71.41094836	50.8388473	61.70280417	501.1246182	215.2812884	6.597352992	4.148194678	0.226686763	698.2095552	706.0899369	693.5298115	0.303960487	426.650981	2596.993896	657.9912444	16.80481739	19.27667091	3.860270484	51.72006449
354.6691982	403.2927708	319.6861926	436.4246313	497.5146635	3.226927306	219.7716415	913.315473	0.285030514	509.2043312	513.5218829	666.4584947	1.524844651	144.2975597	256.2260284	2.255876822	71.32954859	50.99456992	61.70828069	501.1092553	215.2544255	6.595339771	4.148201148	0.226633306	699.1488312	706.6989562	693.5682551	0.304026943	425.5003398	2593.404119	657.9546857	16.81190674	19.27900946	4.01529635	52.31603577
354.6635742	403.2901042	319.6799395	436.4208984	497.5100098	3.228523284	219.7645597	913.3171575	0.28501596	509.3625045	513.4907328	666.4792392	1.52430753	144.2138317	256.1659119	2.255773142	71.2132146	51.18320659	61.69778277	501.0869722	215.2204173	6.593228819	4.148239454	0.226568085	700.2619867	707.3625946	693.6218572	0.304098672	423.8587302	2589.293513	657.9250166	16.81869552	19.33826676	3.885950527	52.56759778
354.6579406	403.2874371	319.6736851	436.4171624	497.5053545	3.230119815	219.7574774	913.3188423	0.285001426	509.5238965	513.4614031	666.4811835	1.524182867	144.1271315	256.116738	2.255674812	71.15561547	51.36051197	61.67379832	501.0650199	215.1916615	6.590988613	4.148262909	0.226516334	701.3230885	707.9729261	693.665615	0.304151601	422.4192847	2584.435789	657.8791133	16.82515412	19.06297496	4.390756788	52.95556577
354.6522974	403.2847696	319.6674295	436.4134232	497.5006977	3.231716877	219.7503946	913.3205274	0.284986912	509.6784464	513.4394899	666.4640829	1.524515011	144.048148	256.0780143	2.255590657	71.17698751	51.50704283	61.62853803	501.0457634	215.1698721	6.588782004	4.148272373	0.226478122	702.2197058	708.4606804	693.7027158	0.304176148	421.4240392	2578.91167	657.8211198	16.83085291	19.11958417	3.952810243	51.95391128
354.6466445	403.2821016	319.6611725	436.4096808	497.4960393	3.233314451	219.7433115	913.3222129	0.284972419	509.8171586	513.4205584	666.4379592	1.524480133	143.9958542	256.0889445	2.25552166	71.23131381	51.63441568	61.55402443	501.0266322	215.1483688	6.58676931	4.148297924	0.22643753	702.9963148	708.8344734	693.7387926	0.30417873	420.5990642	2573.028337	657.7640815	16.83334232	18.87463145	3.837800204	52.17957169
354.640982	403.2794332	319.6549144	436.4059352	497.4913795	3.234912518	219.736228	913.3238986	0.284957946	509.9265027	513.4106584	666.4022873	1.524062516	143.9866347	256.159115	2.255478911	71.33632601	51.72048318	61.44098834	501.0103658	215.1284065	6.585163779	4.148343837	0.226392433	703.5214109	709.0136619	693.7767719	0.304148963	420.203056	2566.956457	657.7134337	16.83152744	18.60984099	3.859603441	52.03201347
354.6353099	403.2767643	319.6486549	436.4021865	497.4867181	3.236511057	219.729144	913.3255847	0.284943493	509.9881996	513.419096	666.3650726	1.523015688	144.0408733	256.2813457	2.255476117	71.50925654	51.73601643	61.27417049	501.0003383	215.1104007	6.584309678	4.148423665	0.22633579	703.6182622	708.8852052	693.8322794	0.304074059	420.5755933	2560.948546	657.6840192	16.82485667	18.64697541	4.01570121	52.22102648
354.6296282	403.2740951	319.6423943	436.3984347	497.4820552	3.23811005	219.7220597	913.3272711	0.284929061	509.9998164	513.4452719	666.3316049	1.521233128	144.160187	256.4587921	2.255513431	71.73601428	51.68229361	61.05789349	500.996254	215.0929708	6.584265947	4.148543229	0.226267179	703.2883976	708.4538969	693.9067921	0.303957203	421.6569914	2555.185909	657.6811884	16.81314192	18.64412936	4.021947749	51.74629018
354.6239369	403.2714254	319.6361324	436.3946796	497.4773908	3.239709476	219.7149751	913.3289578	0.284914649	509.9737126	513.4859963	666.2979823	1.519354954	144.3217007	256.6758892	2.255583123	72.01706148	51.568745	60.81652163	500.9977337	215.07879	6.584817816	4.148680533	0.226203871	702.5977051	707.786443	693.9867486	0.30380642	423.3570479	2549.640636	657.6952693	16.79801503	18.64971584	3.97738512	51.77807073
354.6182359	403.2687552	319.6298694	436.3909214	497.4727249	3.241309316	219.70789	913.3306449	0.284900257	509.9199243	513.5348916	666.2751498	1.517307082	144.5083555	256.9193089	2.25567408	72.31298871	51.41790961	60.57014927	501.0018183	215.0648315	6.585854262	4.148838797	0.226150072	701.6718754	706.9711099	694.0725435	0.303637787	425.3403929	2544.472928	657.7306386	16.78076508	18.46367355	3.99521016	51.61126622
354.6125254	403.2660846	319.6236052	436.3871601	497.4680576	3.24290955	219.7008047	913.3323322	0.284885886	509.857316	513.5774267	666.2825563	1.514642904	144.6940844	257.1803348	2.255764203	72.53947574	51.27993275	60.34855845	501.001547	215.0433106	6.587150979	4.149032564	0.226105949	700.7875923	706.1841863	694.1655691	0.303482656	426.8648122	2539.910115	657.7951361	16.76285626	18.69588964	3.969626304	51.29942182
354.6068052	403.2634137	319.6173398	436.3833957	497.4633887	3.244510158	219.693719	913.3340198	0.284871535	509.7962939	513.6098476	666.328794	1.511594579	144.8582853	257.4360592	2.255844002	72.67065325	51.16977277	60.17623203	500.9956197	215.0134615	6.588590969	4.149255801	0.226080923	700.031207	705.5024057	694.26482	0.30335473	427.7260453	2536.128909	657.8905885	16.74610396	18.78354212	3.793764661	51.28720675
354.6010754	403.2607422	319.6110732	436.3796281	497.4587184	3.246111121	219.6866331	913.3357076	0.284857204	509.7318635	513.6390608	666.4202897	1.508521686	144.9981276	257.6590369	2.255918691	72.71894171	51.06849808	60.06281352	500.9875465	214.9778764	6.590312221	4.149502041	0.226081841	699.2934305	704.885558	694.3775543	0.303250959	428.1832126	2533.412089	658.0236744	16.73175918	18.77337126	3.851586082	50.88516804
354.5953361	403.2580704	319.6048055	436.3758573	497.4540466	3.247712418	219.6795468	913.3373958	0.284842894	509.6767207	513.6616303	666.5689577	1.505732583	145.0876511	257.8147767	2.255976945	72.65414197	50.99237874	60.03855801	500.9762593	214.9358597	6.59218668	4.149763611	0.226119874	698.6678133	704.4232934	694.505533	0.303187814	428.0250283	2531.997315	658.1977493	16.72231795	18.87680015	4.003050161	51.50228146
354.5895871	403.2553982	319.5985367	436.3720835	497.4493734	3.249314031	219.6724602	913.3390842	0.284828604	509.6496668	513.6736343	666.7846245	1.503851613	145.0899632	257.8566372	2.256004127	72.45083133	50.96031389	60.14315303	500.9609211	214.8883694	6.59398609	4.150021667	0.226213402	698.2693197	704.2305844	694.6464285	0.303184242	427.0406444	2532.071322	658.4113222	16.72122878	18.87353655	3.938206701	50.57166411
354.5838285	403.2527255	319.5922668	436.3683065	497.4446988	3.250915939	219.6653734	913.3407729	0.284814334	509.6516926	513.6762885	667.0654503	1.503019912	145.0056511	257.7807494	2.25599987	72.11344423	50.97294188	60.37126742	500.9426899	214.8358454	6.595673871	4.150268509	0.226359889	698.0883939	704.3033502	694.7979335	0.303239296	425.274675	2533.638263	658.6624361	16.7286236	18.86744485	3.884055783	51.33975106
354.5780604	403.2500524	319.5859958	436.3645264	497.4400227	3.252518123	219.6582864	913.3424619	0.284800085	509.6775686	513.6684525	667.3990188	1.502830203	144.8595424	257.6278746	2.255967288	71.65019544	51.03712486	60.68260383	500.921399	214.7759633	6.597211228	4.15050653	0.226537598	698.1315925	704.6027325	694.9516692	0.303343971	422.7025769	2536.428098	658.9445662	16.74179512	18.8099477	4.065460466	51.40744403
354.5722826	403.247379	319.5797237	436.3607432	497.4353451	3.254120564	219.6511991	913.3441511	0.284785856	509.717836	513.6548302	667.7673184	1.503232463	144.6794697	257.4306366	2.255915989	71.09974233	51.14154024	61.033347	500.8999956	214.7100371	6.598613038	4.150727034	0.226728842	698.3055509	705.0379539	695.0985669	0.303480049	419.586452	2540.145593	659.2480388	16.75824994	18.83572542	3.974878871	50.92317775
354.5664953	403.2447051	319.5734505	436.3569569	497.4306662	3.25572324	219.6441116	913.3458406	0.284771647	509.7491568	513.6470125	668.1404508	1.504111045	144.5191367	257.2450041	2.255868825	70.54036235	51.25173896	61.34840408	500.8846713	214.6414976	6.600042289	4.150920596	0.22690539	698.3748606	705.4093974	695.2282115	0.303610474	416.534939	2544.346219	659.560073	16.77342693	18.91098196	3.946349419	51.19981079
354.5606983	403.2420308	319.5671763	436.3531675	497.4259858	3.257326134	219.6370238	913.3475304	0.284757459	509.7675444	513.6472136	668.4994314	1.505373198	144.4025301	257.1026338	2.255830727	70.00394046	51.36743356	61.58130522	500.8773487	214.570733	6.601412148	4.15107624	0.227046565	698.3037297	705.6558748	695.3299052	0.303720363	413.6992341	2548.626117	659.8680308	16.78499271	18.98949145	3.865397321	50.8273726
354.5548918	403.2393561	319.560901	436.349375	497.4213041	3.258929224	219.6299359	913.3492203	0.28474329	509.7894433	513.6513306	668.8388239	1.507294052	144.3150066	256.9892051	2.255789502	69.48475388	51.51363158	61.72725028	500.8773279	214.4974529	6.60240711	4.15117361	0.22714835	698.2143809	705.8507694	695.3952726	0.303817154	410.9017474	2552.728617	660.1604001	16.7941448	19.20543136	4.00909668	51.71754606
354.5490757	403.236681	319.5546248	436.3455794	497.4166209	3.260532491	219.6228478	913.3509106	0.284729142	509.8124731	513.6617415	669.1339048	1.509804427	144.2834023	256.9402935	2.255749775	69.0245503	51.69224335	61.72852415	500.8868507	214.4224579	6.602874882	4.151196352	0.227185539	698.0770046	705.9267524	695.4107227	0.303882728	408.3213605	2556.07921	660.4194217	16.79826218	19.48778452	3.931409088	51.23912764
354.54325	403.2340055	319.5483475	436.3417807	497.4119364	3.262135917	219.6157595	913.352601	0.284715015	509.8332392	513.6798347	669.3539943	1.512649312	144.3436209	257.0082243	2.255716825	68.66970562	51.90916915	61.51074467	500.9077095	214.3456788	6.602627746	4.151129365	0.227124339	697.875091	705.8047478	695.3593422	0.303895199	406.1134778	2557.929532	660.6235079	16.79364554	19.72410359	3.899549357	51.11518114
354.5374147	403.2313296	319.5420692	436.3379789	497.4072505	3.26373948	219.6086711	913.3542917	0.284700907	509.8543419	513.7052386	669.4921511	1.515820336	144.4917052	257.1887316	2.255690153	68.42877898	52.16433632	61.07627657	500.9392026	214.2683036	6.601628682	4.150972593	0.226965651	697.629573	705.4964392	695.2418855	0.303854975	404.2982488	2558.154969	660.7648309	16.78065397	19.89899501	3.993845627	50.84986229
354.5315699	403.2286533	319.53579	436.3341741	497.4025632	3.265343161	219.6015825	913.3559826	0.28468682	509.8698591	513.7402405	669.5546101	1.519277013	144.7114327	257.4542949	2.255675818	68.30063987	52.43346107	60.47428406	500.9798632	214.1933666	6.600153054	4.150748252	0.226733162	697.2878925	705.008199	695.0752442	0.303768573	402.9972252	2557.126117	660.8476897	16.76115031	20.05759634	3.958943047	51.36619966
354.5257155	403.2259767	319.5295097	436.3303661	497.3978745	3.266946941	219.5944938	913.3576737	0.284672754	509.8844426	513.7823284	669.552631	1.522994793	144.9702913	257.7630114	2.255670448	68.26186845	52.70982242	59.7689508	501.0259505	214.1225447	6.598340068	4.150477521	0.226454745	696.9029886	704.4191834	694.8766932	0.303653861	402.1016001	2555.206995	660.8756177	16.73827308	20.1139711	3.842373109	50.6598083
354.5198515	403.2232996	319.5232286	436.3265551	497.3931845	3.268550799	219.587405	913.3593651	0.284658707	509.9128975	513.8247209	669.5163328	1.527093089	145.2002333	258.0283025	2.255661124	68.24949592	52.99391351	59.0835635	501.0705787	214.0573135	6.59634822	4.150191737	0.226183143	696.6186836	703.9126367	694.6754142	0.303550368	401.2637482	2553.169306	660.8610313	16.71845912	20.02558934	3.964082841	50.98208637
354.5139779	403.2206222	319.5169465	436.3227411	497.3884932	3.270154717	219.5803161	913.3610566	0.284644681	509.9541036	513.8668062	669.4508203	1.531420695	145.3770414	258.2183615	2.255650272	68.2564489	53.26820675	58.47574445	501.1102157	214.0004768	6.594399449	4.149917689	0.225944924	696.4420091	703.5302783	694.4902067	0.303469275	400.4971226	2551.283769	660.8046478	16.70400489	20.01801175	3.906704563	50.47929394
354.5080948	403.2179443	319.5106634	436.318924	497.3838005	3.271758674	219.5732271	913.3627484	0.284630674	509.9983331	513.9114156	669.3322975	1.535580785	145.5195317	258.3603789	2.255649665	68.32837454	53.51315892	57.92337465	501.1442226	213.9550075	6.592600723	4.14966781	0.225732642	696.3101487	703.1998286	694.3229615	0.303394758	400.057269	2549.107286	660.6899821	16.69298026	19.8821951	3.987416477	51.36884668
354.5022021	403.2152661	319.5043795	436.3151038	497.3791065	3.273362651	219.5661381	913.3644403	0.284616689	510.0426568	513.9578005	669.1656314	1.539308261	145.6005199	258.4200783	2.255663667	68.45973589	53.7052407	57.49512271	501.1679714	213.9244032	6.591246154	4.149478034	0.225578456	696.2255553	702.963876	694.1972505	0.303338808	399.9733852	2546.926535	660.5174836	16.68790947	19.63348119	3.935281292	50.95550356
354.4962998	403.2125876	319.4980947	436.3112805	497.3744112	3.274966628	219.5590489	913.3661325	0.284602723	510.0798868	514.0062351	668.9597059	1.542270003	145.5882853	258.3553495	2.255700216	68.64351542	53.80923817	57.27953677	501.1761605	213.9131453	6.590774548	4.149396125	0.225524478	696.1590349	702.8599089	694.1441526	0.303315239	400.325825	2545.199889	660.2915793	16.69183118	19.5659145	3.771873126	50.81096973
354.490388	403.2099086	319.491809	436.3074543	497.3697145	3.276570585	219.5519598	913.3678248	0.284588778	510.1075439	514.0561393	668.7168479	1.544323158	145.4853629	258.1714038	2.255760082	68.87974518	53.82019999	57.27945393	501.1684036	213.9214323	6.591228622	4.149425176	0.225570403	696.1014417	702.8763357	694.1596691	0.303321977	401.1260944	2543.973966	660.0172801	16.70443631	19.55679553	3.675027986	51.13510578
354.4844666	403.2072293	319.4855224	436.3036249	497.3650166	3.278174503	219.5448706	913.3695173	0.284574852	510.1334716	514.1035554	668.4546131	1.545673356	145.297954	257.879022	2.255830347	69.136596	53.76413492	57.47022227	501.1471097	213.9449881	6.592349732	4.14953479	0.225698266	696.1110071	703.03264	694.216716	0.303360385	402.1413489	2543.41734	659.7138609	16.72505858	19.49514827	3.819361302	50.76690938
354.4785357	403.2045496	319.479235	436.2997926	497.3603173	3.279778361	219.5377814	913.37121	0.284560948	510.156959	514.1475673	668.1779183	1.546364965	145.0553724	257.5185453	2.255906138	69.41109363	53.65737323	57.79323106	501.1163214	213.9801944	6.593916302	4.149692778	0.225876602	696.1747988	703.2736023	694.2824059	0.30341683	403.3230045	2543.4364	659.3951585	16.75085751	19.52503608	3.997140341	50.86597771
354.4725952	403.2018695	319.4729467	436.2959572	497.3556168	3.281382141	219.5306921	913.3729029	0.284547063	510.1748144	514.1887461	667.8799729	1.546476431	144.8235831	257.1790525	2.255983069	69.72258949	53.52945341	58.11344646	501.0843935	214.0210773	6.595477322	4.149836662	0.226038223	696.2454698	703.4646197	694.2975048	0.303458029	404.6967217	2543.521729	659.0724478	16.77540774	19.55739145	3.788936273	50.56223925
354.4666452	403.1991891	319.4666576	436.2921188	497.350915	3.282985822	219.5236029	913.374596	0.284533198	510.1879675	514.2242926	667.5796284	1.546070695	144.6212215	256.8878825	2.256052519	70.04458323	53.39874256	58.39538238	501.0545032	214.0630528	6.596852559	4.14993842	0.226160461	696.3318703	703.5818737	694.2306505	0.303478376	406.0975295	2543.867099	658.7711387	16.79677459	19.56236989	3.90492258	50.58641396
354.4606856	403.1965083	319.4603677	436.2882773	497.3462119	3.284589385	219.5165137	913.3762892	0.284519354	510.1942246	514.250424	667.3107393	1.544989357	144.426147	256.6188488	2.256110057	70.32776441	53.25635368	58.70266487	501.0240217	214.1049814	6.598269966	4.150017856	0.226267754	696.4471988	703.6736734	694.0858133	0.303493312	407.3325713	2545.226429	658.5230675	16.81696014	19.63030559	3.869602281	51.30702577
354.4547164	403.1938272	319.4540771	436.2844329	497.3415075	3.28619281	219.5094246	913.3779825	0.28450553	510.1938476	514.2634669	667.1016591	1.543305789	144.2595627	256.4033171	2.256144868	70.53191326	53.12413415	58.99823835	500.9967375	214.140788	6.599543815	4.150042968	0.226335091	696.5984161	703.7140667	693.8254791	0.303497841	408.1719922	2547.951338	658.3643397	16.83374687	19.60994738	3.917319091	50.55185718
354.4487378	403.1911457	319.4477856	436.2805854	497.3368019	3.287796078	219.5023355	913.3796761	0.284491726	510.1905545	514.258082	666.9910094	1.541222042	144.1439663	256.2749117	2.256140203	70.59815801	53.03625449	59.23701431	500.9775794	214.1621641	6.600385847	4.149968967	0.226331239	696.8169493	703.6900004	693.4019398	0.303489178	408.2650929	2552.525476	658.3412098	16.84475349	19.9398162	3.961683531	51.26283791
354.4427495	403.1884638	319.4414934	436.2767349	497.3320951	3.289399168	219.4952465	913.3813698	0.284477942	510.183892	514.233499	666.9848477	1.538773682	144.0803321	256.233258	2.25609526	70.51784792	52.99295956	59.42199414	500.9668207	214.1682018	6.600789863	4.149801641	0.226259984	697.0981418	703.6097822	692.8260035	0.303470692	407.5726441	2558.986844	658.4567065	16.84993278	19.86934208	3.85983086	51.06617246
354.4367518	403.1857816	319.4352004	436.2728814	497.327387	3.291002062	219.4881575	913.3830636	0.284464179	510.1716404	514.1941725	667.0466871	1.536008027	144.0775604	256.2823179	2.256021897	70.34744933	52.98094854	59.53259169	500.9643746	214.162717	6.600732072	4.149562837	0.226126356	697.3983489	703.4527489	692.1425523	0.303437261	406.3788063	2566.531571	658.6663633	16.84873345	20.21094354	3.86722768	50.43908937
354.4307445	403.183099	319.4289067	436.2690249	497.3226776	3.292604738	219.4810687	913.3847575	0.284450435	510.153347	514.1427701	667.1544246	1.532965176	144.1203496	256.3943697	2.25592986	70.11797071	52.98109172	59.60026533	500.9675066	214.1500539	6.60033515	4.149293205	0.225958971	697.7008371	703.2556957	691.4120988	0.303398508	404.8625205	2574.737024	658.9338796	16.84296816	20.54468474	3.905624597	51.71217269
354.4247276	403.1804161	319.4226123	436.2651654	497.3179671	3.294207178	219.4739799	913.3864516	0.284436712	510.1274348	514.0837464	667.2735063	1.529584308	144.1640289	256.4994609	2.255837599	69.87706154	52.94944499	59.71963563	500.9688261	214.1396637	6.599986236	4.149077252	0.225823611	697.9854384	703.1070861	690.7427626	0.303377453	403.3350264	2583.120454	659.1994864	16.83746243	20.6628747	3.860839643	50.56654336
354.4187013	403.1777329	319.4163172	436.261303	497.3132553	3.295809363	219.4668913	913.3881459	0.284423009	510.0939648	514.0206324	667.3760622	1.526035442	144.2073208	256.5862044	2.255754593	69.66409007	52.87518632	59.88919948	500.9677624	214.134656	6.59967793	4.148943788	0.22573592	698.2246216	703.0217915	690.1925586	0.303378176	401.9962031	2591.040515	659.4215922	16.8327476	20.71449523	3.998074979	51.12702506
354.4126654	403.1750493	319.4100213	436.2574375	497.3085423	3.297411271	219.4598028	913.3898402	0.284409326	510.0558266	513.9532789	667.4636517	1.522711107	144.2808216	256.6891492	2.255675465	69.47423941	52.7840306	60.03918492	500.9698084	214.1300074	6.599068906	4.148866032	0.225669155	698.4078211	702.9724941	689.7609239	0.303394431	400.7648283	2598.181056	659.5994233	16.82608807	20.75737755	3.949789418	51.21516574
354.4066199	403.1723653	319.4037248	436.2535691	497.3038282	3.299012884	219.4527145	913.3915347	0.284395663	510.0141135	513.8862109	667.5014336	1.519900155	144.3855024	256.7967639	2.255610986	69.35534158	52.66706782	60.15914742	500.9749749	214.1289646	6.598102307	4.148874412	0.22563906	698.5033107	702.9767831	689.5180449	0.303430811	399.8748177	2603.719617	659.6807958	16.8179314	20.69935212	4.407190353	50.80357176
354.400565	403.169681	319.3974277	436.2496976	497.2991128	3.300614181	219.4456263	913.3932293	0.284382021	509.9698115	513.8262454	667.4364434	1.517955316	144.5271774	256.9003685	2.255576775	69.38201235	52.51225078	60.22390551	500.9835769	214.1363727	6.596683158	4.149004254	0.225660582	698.4635132	703.0413138	689.5502079	0.303488629	399.6880281	2606.45093	659.5923516	16.80840215	20.68474316	3.827493747	50.97292648
354.3945005	403.1669964	319.3911299	436.2458233	497.2943963	3.302215144	219.4385383	913.3949239	0.284368398	509.9245447	513.7751447	667.2721712	1.516944625	144.7050169	257.0009814	2.255573026	69.55553808	52.32960554	60.22034949	500.996277	214.1518005	6.594793352	4.149245271	0.225726994	698.2926542	703.1615137	689.8548993	0.303565312	400.1863789	2606.347983	659.3383285	16.79749729	20.33964575	3.874730186	50.83664643
354.3884265	403.1643115	319.3848314	436.2419459	497.2896786	3.303815752	219.4314505	913.3966187	0.284354796	509.878808	513.7325698	667.0466288	1.516500716	144.8884392	257.0762132	2.255595386	69.83724284	52.12587843	60.19475438	501.0097731	214.1754773	6.592728729	4.149580215	0.225839508	698.035265	703.3510421	690.382429	0.303661325	401.1789817	2604.311101	658.9705727	16.78743434	20.13885211	3.871547621	50.45697889
354.382343	403.1616262	319.3785324	436.2380656	497.2849597	3.305415986	219.4243629	913.3983136	0.284341214	509.8342699	513.6979162	666.8016191	1.516396525	145.0691206	257.1337577	2.25563473	70.18385605	51.92641785	60.14209738	501.0244283	214.2042592	6.590575709	4.149961279	0.225972548	697.7330348	703.5856622	691.0564692	0.303767218	402.413562	2601.162423	658.5506809	16.77823647	20.03990622	3.972584295	50.86339013
354.3762499	403.1589406	319.3722327	436.2341823	497.2802396	3.307015826	219.4172755	913.4000086	0.284327652	509.7935545	513.6672423	666.6170469	1.516297037	145.2485699	257.2067927	2.25566928	70.50328462	51.78188288	60.03281322	501.0430763	214.2296212	6.588343303	4.150292187	0.226069579	697.4581851	703.808364	691.7262292	0.303864361	403.3619877	2598.426615	658.196045	16.76845538	19.64263696	3.829192731	50.69283486
354.3701474	403.1562547	319.3659325	436.2302961	497.2755184	3.308615252	219.4101883	913.4017037	0.28431411	509.7588709	513.6418332	666.5280673	1.515916411	145.4042031	257.285434	2.255693955	70.76460042	51.71115542	59.8826282	501.0640798	214.2510633	6.586233739	4.150534815	0.226115218	697.2579835	704.0095057	692.3250749	0.303945508	403.841279	2596.891777	657.9599334	16.7594444	19.40902867	3.937738265	50.82867441
354.3640353	403.1535685	319.3596316	436.2264069	497.2707961	3.310214244	219.4031014	913.4033989	0.284300588	509.7329951	513.6289851	666.512319	1.515251586	145.5091949	257.336628	2.255720505	71.01263424	51.70947035	59.71018371	501.0842575	214.2746378	6.584438797	4.150701198	0.226122604	697.1377007	704.2066837	692.8807155	0.304010203	404.0615225	2596.202216	657.8153278	16.75369084	19.2586374	3.991920619	51.2081869
354.3579138	403.1508819	319.3533302	436.2225147	497.2660726	3.311812784	219.3960148	913.4050941	0.284287087	509.7189793	513.6310935	666.6076126	1.513942069	145.5330056	257.3446707	2.255744207	71.21741017	51.79816009	59.53693597	501.1011465	214.3007384	6.58322544	4.150745571	0.226074018	697.1566731	704.3885354	693.3124095	0.304048915	403.8381337	2597.263934	657.8222631	16.75311035	19.45298357	3.98335246	50.65633606
354.3517827	403.148195	319.3470283	436.2186197	497.261348	3.313410851	219.3889284	913.4067894	0.284273605	509.7198492	513.6504032	666.8639519	1.511440039	145.4304074	257.2818788	2.255759285	71.33679692	51.99757788	59.40920885	501.1103888	214.330606	6.583005076	4.150617825	0.22595459	697.3934534	704.5507018	693.5184809	0.30405248	402.9335617	2601.345034	658.0589514	16.76073512	19.48849073	3.838904331	51.28995776
354.3456421	403.1455078	319.3407258	436.2147217	497.2566223	3.315008425	219.3818423	913.4084848	0.284260144	509.7352452	513.6865764	667.269365	1.507836218	145.1988789	257.1420399	2.255767272	71.37387311	52.30108685	59.33530241	501.1112324	214.3650208	6.583822642	4.150331833	0.225773133	697.8427651	704.6919151	693.492413	0.304021319	401.4193761	2608.254105	658.5138044	16.77695068	19.57564511	3.959744178	50.83842509
354.339492	403.1428203	319.3344228	436.2108207	497.2518955	3.316605487	219.3747565	913.4101803	0.284246703	509.7608638	513.7322	667.7900655	1.503652779	144.8811034	256.9561753	2.255764996	71.32250424	52.69062133	59.28575807	501.1074629	214.399742	6.585373449	4.14993114	0.225542898	698.4455913	704.794527	693.2535746	0.303960692	399.4011682	2617.156507	659.1422318	16.79872401	19.58332294	3.880359231	50.70407701
354.3333324	403.1401325	319.3281193	436.2069169	497.2471676	3.318202018	219.367671	913.4118758	0.284233281	509.7922779	513.782578	668.3668311	1.499446909	144.5070746	256.7323625	2.255758149	71.20985782	53.13081428	59.25502812	501.1004666	214.4348844	6.587453349	4.149490411	0.22529907	699.1301739	704.8652129	692.8640257	0.303881628	397.1759873	2626.805744	659.8642469	16.82450106	19.85392852	3.935628142	51.10575024
354.3271633	403.1374444	319.3218153	436.2030101	497.2424386	3.319797996	219.3605858	913.4135714	0.28421988	509.8226782	513.8328434	668.8851927	1.496203823	144.1261345	256.4777676	2.255762516	71.11179582	53.55747176	59.22975977	501.0923851	214.4729489	6.589688764	4.149146024	0.225106634	699.7627944	704.9290919	692.4741993	0.303805416	395.3556763	2634.77171	660.5203239	16.85194051	19.98456989	3.952476551	50.50335528
354.3209847	403.1347559	319.3155109	436.1991004	497.2377085	3.321393404	219.353501	913.415267	0.284206499	509.8465445	513.8752833	669.2938632	1.494439847	143.7735075	256.2091353	2.255778934	71.03509497	53.93555137	59.20550708	501.0850041	214.5122489	6.591864571	4.148967133	0.224996664	700.2767672	704.9811145	692.115632	0.303741397	394.166455	2640.010042	661.0449593	16.87886472	20.0352662	3.928137278	50.85258765
354.3147967	403.1320672	319.3092059	436.1951878	497.2329773	3.32298822	219.3464166	913.4169626	0.284193138	509.8612509	513.9032324	669.6044317	1.494038449	143.4473362	255.9295378	2.255798356	70.93331661	54.25782334	59.2102838	501.077053	214.5505292	6.594102283	4.148954196	0.224972011	700.6901106	705.000866	691.7048702	0.303686842	393.5042406	2642.976742	661.4675755	16.90521697	20.10261254	3.891546044	50.58232673
354.3085991	403.1293781	319.3029006	436.1912723	497.228245	3.324582426	219.3393325	913.4186583	0.284179798	509.8593882	513.9061333	669.7560165	1.495579413	143.1905827	255.6599548	2.255820634	70.80935508	54.47860671	59.24480841	501.0704173	214.5856025	6.59615513	4.149192731	0.225071695	700.9234414	704.9813885	691.2724717	0.30365341	393.6317776	2642.479707	661.7117851	16.9282773	20.10545273	4.011994232	50.70114752
354.3023921	403.1266888	319.2965948	436.1873539	497.2235117	3.326176001	219.3322488	913.4203541	0.284166477	509.8313208	513.8695832	669.6774434	1.499809341	143.0653786	255.4367974	2.25584314	70.65941944	54.54415787	59.29888581	501.068629	214.6131736	6.597642079	4.149784298	0.225338918	700.8742925	704.9082642	690.8549286	0.303655193	394.8300573	2637.069512	661.6871338	16.94182014	20.22653453	4.008085293	50.95574819
354.2961755	403.1239992	319.2902885	436.1834326	497.2187774	3.327768926	219.3251655	913.4220498	0.284153176	509.7768159	513.7935818	669.3763976	1.506634144	143.0749254	255.2721745	2.255864051	70.47875153	54.45515891	59.37458102	501.0716586	214.6317885	6.598537877	4.150711665	0.225767042	700.5500239	704.7830184	690.4491527	0.303691979	397.0555726	2626.986462	661.4037281	16.94715961	20.19588776	3.884681507	50.79013777
354.2899495	403.1213093	319.2839819	436.1795084	497.214042	3.329361181	219.3180826	913.4237456	0.284139895	509.7028545	513.6916498	668.8954554	1.515560745	143.1912312	255.1657392	2.255889109	70.29907201	54.24674889	59.46249703	501.0781944	214.6430058	6.598921726	4.15188636	0.226318924	700.0071511	704.6344103	690.0958847	0.303758047	400.169514	2613.111304	660.9052347	16.94548376	20.16451341	3.879252963	51.33514375
354.283714	403.118619	319.2776749	436.1755813	497.2093055	3.330952747	219.3110001	913.4254414	0.284126635	509.6169451	513.5757399	668.3107719	1.525827635	143.3790591	255.1230654	2.255916135	70.11600953	53.96853319	59.55923903	501.0866486	214.6461808	6.598956389	4.153183718	0.226939432	699.3378968	704.4758927	689.7738399	0.303841505	403.8297649	2597.077067	660.2852423	16.9380559	20.200295	3.823377711	50.90990573
354.277469	403.1159285	319.2713675	436.1716513	497.204568	3.332543604	219.303918	913.4271372	0.284113394	509.5330739	513.4661926	667.7710353	1.535967301	143.561336	255.1387655	2.255938401	69.9019257	53.71525224	59.67104981	501.0931159	214.6409848	6.599077762	4.15437849	0.227528991	698.7275315	704.3210488	689.3979915	0.303917188	407.3529591	2582.078625	659.7339937	16.92839035	20.17675205	3.974361011	51.57828437
354.2712145	403.1132378	319.2650598	436.1677184	497.1998296	3.334133732	219.2968365	913.4288331	0.284100174	509.4581865	513.3756495	667.3427175	1.545286029	143.7128183	255.2271462	2.255956354	69.66916618	53.53108891	59.78575825	501.0968042	214.6266109	6.599341578	4.155352221	0.228034893	698.2508176	704.193392	688.988483	0.303976883	410.454208	2569.512388	659.3260279	16.91695805	20.14945023	3.824274518	50.77495473
354.2649506	403.1105467	319.2587517	436.1637827	497.1950901	3.335723111	219.2897553	913.4305289	0.284086973	509.3893583	513.3029058	667.0073844	1.553930249	143.8702912	255.4293142	2.255971742	69.44245295	53.40018772	59.88024114	501.1004217	214.5997908	6.599411336	4.15611016	0.228457797	697.8642946	704.1100855	688.6310002	0.304029531	413.216037	2558.978646	659.0237544	16.90046832	20.17141712	3.867319633	50.7353128
354.2586772	403.1078553	319.2524433	436.1598441	497.1903496	3.337311722	219.2826747	913.4322247	0.284073793	509.3347587	513.2632002	666.8465857	1.561054878	144.0075706	255.7676789	2.255985015	69.23871338	53.3761124	59.93489701	501.1035109	214.5590989	6.599308861	4.156507338	0.228732153	697.6544511	704.1017406	688.3616067	0.304066098	415.2846556	2552.159983	658.9160594	16.87910903	20.1121112	3.945653179	51.54708793
354.2523943	403.1051637	319.2461345	436.1559026	497.1856081	3.338899545	219.2755945	913.4339206	0.284060632	509.3054838	513.2775224	666.9589535	1.565626192	144.0882288	256.2641707	2.255999487	69.0907509	53.52759654	59.92229839	501.1053886	214.5038964	6.599068998	4.156364611	0.228777137	697.7275899	704.2120648	688.241675	0.304075677	416.2514524	2551.047188	659.107245	16.85352635	19.94547144	3.832236087	50.7711472
354.246102	403.1024718	319.2398255	436.1519583	497.1808656	3.34048656	219.2685149	913.4356164	0.284047492	509.3007837	513.3441324	667.3380939	1.567522711	144.1123492	256.9137211	2.256015157	69.00792316	53.84644933	59.83964102	501.1067252	214.4352856	6.598654012	4.155684254	0.228592928	698.0745214	704.441313	688.2924624	0.304060126	416.1067363	2555.498978	659.584757	16.82396708	19.69039715	3.802768876	51.29813891
354.2398001	403.0997796	319.2335161	436.1480111	497.1761221	3.342072748	219.2614358	913.4373122	0.284034372	509.3152117	513.4485362	667.9334143	1.566918733	144.0713845	257.6636802	2.256027932	68.96873116	54.29063662	59.71572146	501.107107	214.3580927	6.598233862	4.154561111	0.228222135	698.6549645	704.7511118	688.4509348	0.304021828	414.9737094	2564.517506	660.2988114	16.79303025	19.53254815	3.911232109	51.33194041
354.2334889	403.0970872	319.2272065	436.1440611	497.1713777	3.343658088	219.2543572	913.439008	0.284021271	509.3395229	513.5719545	668.6517637	1.564376041	143.9841071	258.471438	2.256037291	68.97257011	54.79123939	59.56920968	501.107857	214.2769337	6.597774721	4.15314601	0.227731645	699.3700677	705.1083303	688.7111239	0.303972256	413.17688	2576.164294	661.1389825	16.76172404	19.47951194	4.012314138	50.96030472
354.2271681	403.0943945	319.2208967	436.1401082	497.1666323	3.345242562	219.2472791	913.4407037	0.284008191	509.3545293	513.6783939	669.3047355	1.561293238	143.9090725	259.2817686	2.256043117	69.01771004	55.21273898	59.42882987	501.1121807	214.1976118	6.59707524	4.151743043	0.227256504	700.009686	705.4553316	689.077138	0.303936809	411.4303523	2586.517848	661.8805009	16.72991494	19.41717181	3.966514979	51.53178422
354.2208379	403.0917015	319.2145866	436.1361524	497.1618859	3.34682615	219.2402017	913.4423994	0.283995131	509.353386	513.7514148	669.8193286	1.557970594	143.8452257	260.0354867	2.256044155	69.10012534	55.4998619	59.31547087	501.120722	214.1264149	6.596223513	4.150477202	0.22685133	700.5031994	705.7564742	689.524684	0.303922361	409.948975	2594.021708	662.4390338	16.7000997	19.35400652	3.897084752	50.7993584
354.2144983	403.0890083	319.2082762	436.1321939	497.1571386	3.348408831	219.2331248	913.4440951	0.283982091	509.3421815	513.7978381	670.2416311	1.553619827	143.7451664	260.6927987	2.25604085	69.23326137	55.68220872	59.22537541	501.1326519	214.0684716	6.595438441	4.149275456	0.226481065	700.9118704	706.0157582	690.0558559	0.30392023	408.4610987	2599.513744	662.8651584	16.67585251	19.35471545	3.884179532	50.30945423
354.2081492	403.0863148	319.2019657	436.1282325	497.1523904	3.349990586	219.2260485	913.4457908	0.28396907	509.3134402	513.798682	670.4868557	1.548562586	143.6016499	261.1748177	2.256032249	69.41389542	55.69693327	59.18272967	501.1486344	214.0322136	6.594860708	4.14828608	0.226209924	701.1553588	706.18991	690.6404373	0.303937682	407.2098106	2601.141559	663.0607019	16.66067098	19.52919724	3.921315954	50.99901296
354.2017906	403.083621	319.1956549	436.1242683	497.1476412	3.351571396	219.2189727	913.4474864	0.28395607	509.2580657	513.729831	670.4522127	1.543211089	143.4001715	261.3770065	2.256016066	69.62805684	55.46798666	59.22408305	501.1688953	214.0283373	6.594735346	4.147696084	0.226119425	701.1414774	706.2190503	691.2147413	0.303981847	406.4857882	2596.67575	662.9117306	16.65940573	19.79896153	4.006185126	50.08739009
354.1954226	403.080927	319.189344	436.1203012	497.1428911	3.35315124	219.2118976	913.4491819	0.28394309	509.1775233	513.5931366	670.1420408	1.537616113	143.1388696	261.2881194	2.255992953	69.87364918	55.00342667	59.34931132	501.1922848	214.0581233	6.595091828	4.147510412	0.226209383	700.8839216	706.1061085	691.764685	0.304050495	406.2616673	2586.274882	662.4262146	16.67259384	19.74107681	3.780153245	50.6893019
354.1890451	403.0782327	319.1830329	436.1163313	497.1381401	3.3547301	219.2048232	913.4508774	0.283930129	509.0746839	513.3998419	669.582168	1.532272274	142.861473	260.9745731	2.25596537	70.14678293	54.33531142	59.53982477	501.2171681	214.1144002	6.595659015	4.147696481	0.226463168	700.4086701	705.888026	692.3029914	0.304142899	406.5436656	2570.767984	661.6378005	16.69575235	19.99700017	3.793917787	50.15448014
354.1826582	403.0755382	319.1767216	436.1123587	497.1333882	3.356307954	219.1977494	913.4525729	0.283917189	508.9590698	513.1717038	668.8590127	1.52711908	142.5804495	260.4994382	2.255935409	70.44237566	53.53893773	59.7721109	501.2405079	214.1903719	6.596319191	4.148129413	0.226822325	699.8152759	705.613493	692.8268352	0.30424843	407.0772331	2552.218529	660.6539536	16.72583156	19.92995609	3.833799465	50.52559218
354.1762619	403.0728434	319.1704102	436.1083832	497.1286354	3.357884785	219.1906762	913.4542682	0.283904268	508.8511461	512.9537489	668.1663943	1.521521088	142.2970993	259.9845374	2.255906628	70.76091137	52.77107039	59.99652416	501.2574519	214.2732689	6.596913832	4.148508968	0.227149545	699.3183031	705.3786338	693.3530211	0.304344096	407.2385175	2535.017998	659.7079961	16.7577771	20.00133647	3.848753366	50.83889174
354.1698561	403.0701484	319.1640986	436.1044049	497.1238817	3.359460571	219.1836037	913.4559635	0.283891368	508.7575032	512.7629062	667.5578849	1.515881059	142.0410884	259.4891999	2.255881614	71.08974357	52.08892703	60.19528646	501.26474	214.3562803	6.597283579	4.148772409	0.227413744	698.9839905	705.2242828	693.8631855	0.304422858	406.930554	2520.598839	658.8725882	16.78788845	20.04485075	4.034210172	51.23617695
354.1634409	403.0674532	319.1577869	436.1004238	497.1191271	3.361035293	219.1765319	913.4576588	0.283878488	508.6726267	512.5878554	666.9589179	1.511266962	141.8407236	258.9767585	2.255861197	71.40370918	51.45547013	60.38817294	501.2604128	214.4422131	6.597445554	4.149078197	0.227682383	698.7506961	705.1261867	694.2877421	0.304489572	406.4795504	2507.582764	658.0746051	16.81649549	19.93889337	3.837697273	50.94589567
354.1570162	403.0647577	319.1514752	436.0964399	497.1143717	3.362608932	219.1694608	913.4593539	0.283865627	508.6040143	512.4482623	666.4275979	1.508316938	141.735018	258.5175834	2.255848597	71.6823531	50.93772393	60.55651431	501.2402244	214.5226698	6.59721779	4.149366319	0.227925125	698.6932632	705.1307364	694.5920218	0.304535875	405.8100818	2497.576081	657.3968741	16.8389788	19.77117397	3.760969787	50.93667969
354.1505822	403.0620619	319.1451633	436.0924532	497.1096154	3.364181468	219.1623904	913.461049	0.283852786	508.559712	512.367637	666.028104	1.507956658	141.7839687	258.2130564	2.255847941	71.90083803	50.61302277	60.67555638	501.1993639	214.5856842	6.596301889	4.149570449	0.228108784	698.8909262	705.2974533	694.7428244	0.304553763	404.8819834	2492.424768	656.9317614	16.84848721	19.74621854	3.877893326	51.47513061
354.1441386	403.059366	319.1388514	436.0884638	497.1048582	3.365752881	219.1553208	913.4627439	0.283839966	508.5397907	512.3457425	665.7591578	1.510334861	141.993316	258.0646714	2.255859422	72.04977314	50.48040191	60.74611517	501.1389734	214.6297819	6.594735475	4.149708452	0.228240047	699.3256439	705.6159137	694.7275333	0.304543886	403.7845042	2491.975156	656.6792154	16.84466918	19.78709192	3.982802169	51.03620745
354.1376857	403.0566697	319.1325394	436.0844715	497.1001002	3.367323151	219.1482518	913.4644388	0.283827165	508.5449987	512.3789379	665.6462628	1.514364219	142.3167214	258.0452318	2.25588056	72.14313836	50.52829596	60.7675481	501.0653733	214.6566805	6.592764409	4.149723903	0.228294981	699.9719096	706.0517694	694.5903571	0.304507165	402.4429411	2496.083615	656.6518317	16.8306306	19.66200897	3.839757001	51.63603593
354.1312233	403.0539733	319.1262274	436.0804765	497.0953413	3.368892259	219.1411837	913.4661336	0.283814384	508.5689076	512.4490087	665.6418358	1.519520051	142.7226102	258.0950619	2.255908425	72.18671707	50.69357493	60.75625651	500.9857803	214.6710263	6.590643578	4.149685676	0.228305784	700.7256677	706.5405975	694.3544647	0.304452754	401.0676155	2503.048964	656.7789733	16.8102464	19.50399871	3.854515774	51.55912627
354.1247515	403.0512767	319.1199153	436.0764787	497.0905816	3.370460185	219.1341163	913.4678282	0.283801624	508.5953409	512.5132084	665.6099386	1.525121713	143.15428	258.0709932	2.255937284	72.19198367	50.82960113	60.75536614	500.9119282	214.6859656	6.588842398	4.149794698	0.228365288	701.3696105	706.9543369	694.0459946	0.304400835	400.1324098	2508.894221	656.8772761	16.79192207	19.41577085	3.819525536	50.98470039
354.1182703	403.0485798	319.1136033	436.0724781	497.0858211	3.37202691	219.1270497	913.4695228	0.283788883	508.6214322	512.5613825	665.5446966	1.530381861	143.5776593	257.9448141	2.255964285	72.16552957	50.90016118	60.77099632	500.8517416	214.7023164	6.587599979	4.150048672	0.228474801	701.8299134	707.2409028	693.7028839	0.304357312	399.7440851	2512.713946	656.9228704	16.77824694	19.41326	3.813248223	51.45029078
354.1117797	403.0458827	319.1072912	436.0684748	497.0810597	3.373592413	219.1199838	913.4712172	0.283776162	508.6548826	512.612339	665.5340204	1.535114791	144.0077523	257.8036536	2.255990398	72.09618389	50.96612594	60.77895369	500.8075008	214.7082546	6.586845432	4.150316405	0.228576314	702.1521787	707.4233465	693.3431375	0.304316483	399.8097115	2516.130706	657.0176221	16.76493699	19.39306559	3.849579947	51.56410233
354.1052796	403.0431853	319.1009791	436.0644687	497.0762976	3.375156674	219.1129188	913.4729115	0.283763461	508.6926034	512.6552696	665.5789784	1.538317085	144.4048792	257.6260095	2.256012039	71.99219776	50.98777158	60.78424559	500.7892546	214.7032472	6.586848857	4.150577564	0.228664566	702.2497885	707.4411768	693.0196312	0.304285463	400.4481014	2518.192855	657.141216	16.75453997	19.41843411	3.868612567	50.77414868
354.0987702	403.0404878	319.0946671	436.0604599	497.0715347	3.376719675	219.1058546	913.4746057	0.28375078	508.7319605	512.6786527	665.6964081	1.538445674	144.7089271	257.3860898	2.256024392	71.87082021	50.9227024	60.78999695	500.8097244	214.6869987	6.587961488	4.150772156	0.228718172	702.0315377	707.2236674	692.8124605	0.304271648	401.714978	2518.009874	657.2833005	16.75062361	19.38402441	3.844338193	51.30298738
354.0922513	403.03779	319.0883551	436.0564483	497.0667709	3.378281396	219.0987913	913.4762998	0.283738118	508.773209	512.6846394	665.8957707	1.535432585	144.9148282	257.1027148	2.256027253	71.73316131	50.77924064	60.79338111	500.8685417	214.6583884	6.590156046	4.150873086	0.228726837	701.5086298	706.7776373	692.7336145	0.304274366	403.5646316	2515.82409	657.454053	16.75260717	19.32027953	3.872186908	51.07026614
354.085723	403.035092	319.0820432	436.0524339	497.0620064	3.379841816	219.0917288	913.4779937	0.283725477	508.8118544	512.6683099	666.1127471	1.530217206	145.0358132	256.7580371	2.256022183	71.57818126	50.5469227	60.80711447	500.9562916	214.6245692	6.593245489	4.150973953	0.228732221	700.7105341	706.1344252	692.7446483	0.30429321	405.9815866	2511.219942	657.5944366	16.76068874	19.12292169	3.831589559	51.25671072
354.0791853	403.0323938	319.0757314	436.0484169	497.0572411	3.381400917	219.0846671	913.4796875	0.283712856	508.8502057	512.6417493	666.3509491	1.523678741	145.0968638	256.3969972	2.256012141	71.4024713	50.27281728	60.8246361	501.0615509	214.5860589	6.596915812	4.151059678	0.228727514	699.741959	705.3656684	692.8148874	0.30432043	408.7563129	2505.395124	657.7286243	16.77196592	19.02055304	3.812599865	51.55872263
354.0726382	403.0296954	319.0694196	436.0443971	497.052475	3.382958678	219.0776064	913.4813811	0.283700254	508.896794	512.63659	666.6524412	1.517589689	145.1646211	256.13131	2.256003925	71.19135458	50.07321167	60.82346219	501.1631006	214.5389197	6.600532245	4.151066794	0.22868196	698.8227977	704.6187431	692.8748632	0.304338269	411.4827522	2501.308349	657.9468483	16.77899157	18.96360349	3.967754074	51.06858454
354.0660817	403.0269968	319.0631079	436.0403745	497.0477082	3.384515079	219.0705465	913.4830746	0.283687672	508.9498562	512.6556505	666.9867638	1.512666526	145.2483546	255.9764789	2.255999189	70.95066739	49.9643036	60.80672198	501.2501271	214.4880821	6.603826516	4.151015784	0.228606634	698.0286854	703.9498451	692.9071715	0.304342792	413.9801817	2499.408304	658.228708	16.78071787	19.00653217	3.872931834	51.86357257
354.0595158	403.024298	319.0567964	436.0363493	497.0429406	3.386070102	219.0634876	913.4847679	0.283675111	509.0016033	512.6817195	667.3047112	1.508136622	145.296755	255.8893707	2.255994193	70.70679982	49.88972717	60.79006193	501.3252688	214.4415653	6.606916526	4.150923573	0.228516261	697.3091958	703.3279067	692.9702906	0.304341304	416.2148538	2498.461206	658.5003082	16.78108986	19.01633613	3.95180498	51.83630375
354.0529405	403.021599	319.050485	436.0323213	497.0381723	3.387623726	219.0564295	913.4864611	0.283662569	509.0489855	512.716163	667.5634113	1.504742489	145.3145083	255.8819834	2.255990464	70.47252916	49.86218654	60.77901281	501.3754267	214.4067464	6.609479585	4.150813957	0.228424784	696.7545689	702.8201066	693.0524981	0.304329759	417.9418098	2498.900131	658.7277462	16.77940923	18.98490687	3.839826752	51.19247402
354.0463558	403.0188998	319.0441737	436.0282906	497.0334033	3.389175931	219.0493724	913.4881541	0.283650047	509.0864398	512.7564563	667.686408	1.503568618	145.3094249	255.9491367	2.255989974	70.2635552	49.88356604	60.78631222	501.3835403	214.3952659	6.611120927	4.150757323	0.228366947	696.4643365	702.5049328	693.1280724	0.30430452	418.9039399	2500.853809	658.8436753	16.7755668	19.0352641	3.824502398	51.60910322
354.0397617	403.0162004	319.0378626	436.0242572	497.0286335	3.390726699	219.0423163	913.4898469	0.283637544	509.1115478	512.7990653	667.6632498	1.504471304	145.2752016	256.0798738	2.255992174	70.09019929	49.94428672	60.81663612	501.3496486	214.409007	6.611824397	4.150760624	0.228346373	696.4398615	702.3897861	693.205837	0.30426743	419.056255	2504.067434	658.8341497	16.77028624	19.02585735	3.720724969	50.9161382
354.0331582	403.0135008	319.0315516	436.020221	497.023863	3.392276008	219.0352611	913.4915396	0.283625062	509.1290753	512.8532992	667.5604956	1.50714762	145.2348221	256.2966657	2.255997857	69.94383523	50.07382587	60.85838421	501.2810905	214.438293	6.611671797	4.150773394	0.228334386	696.6752551	702.4746399	693.2743577	0.304217926	418.4561941	2509.070341	658.7742609	16.76167223	18.95807936	3.83018304	51.16105829
354.0265453	403.010801	319.0252409	436.0161822	497.0190918	3.39382384	219.0282069	913.493232	0.2836126	509.1382101	512.9131268	667.4063079	1.510709856	145.1805659	256.5708009	2.256005044	69.82845365	50.24841348	60.91354378	501.1906292	214.478311	6.610930756	4.150787549	0.228323636	697.0904887	702.7132346	693.3518886	0.304162837	417.2677681	2515.073622	658.6802424	16.75125322	18.95702688	3.963945765	51.55119581
354.0199231	403.008101	319.0189303	436.0121407	497.0143199	3.395370175	219.0211536	913.4949243	0.283600157	509.136596	512.9620292	667.245763	1.513140755	145.0774557	256.8364411	2.25600845	69.75174045	50.40273614	60.98780506	501.105446	214.5210489	6.610230983	4.150785095	0.228301825	697.4940131	702.983758	693.4953798	0.304117263	415.8683549	2520.180832	658.5643918	16.74323436	18.95290813	3.882606736	51.23780346
354.0132914	403.0054009	319.01262	436.0080965	497.0095473	3.396914993	219.0141014	913.4966164	0.283587734	509.1251095	512.9996456	667.1150927	1.51390809	144.9367784	257.0758751	2.256007676	69.71550915	50.53382257	61.07986864	501.0347867	214.5610074	6.609725665	4.150758236	0.228259262	697.8460016	703.2693274	693.700988	0.304084983	414.3581769	2524.088379	658.4610744	16.73787678	19.00218021	3.951491004	51.52586452
354.0066504	403.0027005	319.0063099	436.0040496	497.004774	3.398458275	219.0070502	913.4983083	0.283575331	509.1029607	513.0311708	666.9969267	1.51381608	144.7930193	257.2880134	2.25600567	69.72831954	50.66652607	61.19281288	500.9688338	214.6016845	6.609114738	4.150746618	0.228209116	698.2362168	703.6453599	693.9234773	0.304062006	412.551213	2527.311916	658.3698204	16.73378598	18.91542203	3.879155294	51.70654812
354	403	319	436	497	3.4	219	913.5	0.283562948	509.0713253	513.0564645	666.9316504	1.512336427	144.6655847	257.446398	2.256002384	69.792109	50.79848285	61.32569829	500.9178227	214.637003	6.608561173	4.150752312	0.228143617	698.622907	704.0968625	694.1490827	0.304052469	410.5650955	2529.497961	658.3306693	16.7312538	18.80353995	3.881612805	51.15454037
353.9932696	402.9972988	318.9936383	435.9959206	496.9951996	3.401540149	218.99291	913.5017127	0.283550585	509.0341821	513.0804857	666.9887331	1.508924492	144.5890594	257.5336612	2.255998531	69.90185082	50.9431336	61.4717474	500.8945714	214.6565867	6.608256085	4.150761723	0.22804444	698.9646392	704.6094913	694.3507031	0.304059497	408.5552195	2530.591608	658.4185063	16.72956285	18.81403961	3.964419141	50.62019751
353.9863892	402.9945966	318.9871731	435.9917844	496.9903471	3.403078703	218.9857398	913.5034674	0.283538242	508.9928398	513.1038452	667.1654308	1.503793964	144.5688066	257.5496161	2.255994835	70.05439019	51.10139391	61.6264181	500.8985987	214.6605748	6.608173921	4.150778641	0.227915575	699.2606563	705.1752471	694.5152929	0.304081985	406.5585895	2530.654432	658.6322977	16.72849748	18.8374531	3.859731989	51.77022228
353.97936	402.9918931	318.9806053	435.987592	496.985443	3.404615641	218.9784899	913.5052638	0.283525918	508.9475223	513.1192089	667.4264555	1.496987259	144.5657931	257.4997471	2.25598975	70.24220378	51.24261317	61.78338512	500.9298963	214.6529255	6.608399927	4.150790389	0.227767014	699.4568918	705.7243585	694.6709977	0.304119948	404.7098744	2529.300029	658.9218035	16.72945338	18.88782922	3.9142192	51.17712244
353.9721829	402.9891885	318.9739356	435.9833435	496.9804877	3.406150944	218.971161	913.5071016	0.283513614	508.9002803	513.1275503	667.7307392	1.489344254	144.5657391	257.4125597	2.25598436	70.45436017	51.36802574	61.93248045	500.9790337	214.6391154	6.608771659	4.150792294	0.227611308	699.5776409	706.2403263	694.8121785	0.304167387	403.0049991	2526.962594	659.2471721	16.73183956	18.96750234	3.847751932	51.26948814
353.964859	402.9864826	318.9671649	435.9790395	496.9754816	3.407684592	218.9637537	913.5089804	0.28350133	508.8528552	513.1327755	667.9894086	1.482692628	144.5512728	257.3444722	2.255981434	70.67824727	51.49243034	62.06184633	501.0221766	214.632017	6.608832598	4.150792519	0.227475545	699.723148	706.7439369	694.9212735	0.304211613	401.2770322	2524.709426	659.5288746	16.73403159	18.98474785	3.910357767	51.72253707
353.9573894	402.9837754	318.9602938	435.9746804	496.970425	3.409216566	218.9562685	913.5109	0.283489066	508.8088091	513.1339794	668.1734899	1.477594439	144.5016638	257.3171414	2.255981304	70.89560421	51.60616283	62.15757073	501.0556652	214.6346052	6.608574258	4.150778357	0.227369606	699.8683453	707.1768319	694.9982974	0.304248361	399.6614221	2522.702291	659.7331839	16.73599069	18.99688695	3.997756674	51.45323825
353.9497751	402.9810669	318.9533233	435.9702664	496.9653183	3.410746845	218.9487061	913.51286	0.283476822	508.7745742	513.1314727	668.3246174	1.473698379	144.419789	257.32229	2.255983722	71.08316411	51.69871625	62.2032132	501.0925296	214.639005	6.608304869	4.150727059	0.227285137	699.9116273	707.4451699	695.0316971	0.304279276	398.5090978	2520.655063	659.8952918	16.73794164	18.9443588	3.720589022	50.77105999
353.9420171	402.978357	318.9462541	435.965798	496.960162	3.412275411	218.941067	913.5148602	0.283464597	508.7557645	513.1251881	668.4154717	1.47167482	144.2823051	257.3881454	2.255989179	71.21327471	51.76009886	62.17925554	501.1297762	214.6474144	6.608056229	4.150619306	0.22723203	699.8111045	707.4665698	695.0182543	0.304298913	398.033489	2518.799064	659.9823826	16.73968088	18.97113987	3.858058564	51.68298958
353.9341165	402.9756456	318.9390869	435.9612756	496.9549563	3.413802243	218.9333519	913.5169001	0.283452392	508.7585562	513.1125021	668.4094452	1.472150356	144.0488941	257.547071	2.255997369	71.25233823	51.76842648	62.06305951	501.1653785	214.6627792	6.607928912	4.150426627	0.227221903	699.4953371	707.1241715	694.9683352	0.30430192	398.5251115	2517.214329	659.9457841	16.74153985	18.98607767	3.823818874	50.98346227
353.9260744	402.9729328	318.9318226	435.9566996	496.9497018	3.415327322	218.9255613	913.5189796	0.283440207	508.7822999	513.0940231	668.3144065	1.47504142	143.7234336	257.7943617	2.256007808	71.19549021	51.72151218	61.85286765	501.2004127	214.6840002	6.60798027	4.150152396	0.22725049	698.9647334	706.4196141	694.8852881	0.304284859	400.0629331	2515.874419	659.7931722	16.74355314	19.05474937	3.985342804	51.06066294
353.9178918	402.9702185	318.924462	435.9520703	496.9443988	3.416850627	218.9176959	913.5210983	0.283428042	508.817375	513.0727799	668.1328932	1.480191498	143.3366711	258.1099194	2.25602015	71.06951273	51.63725677	61.56959807	501.2271877	214.7135933	6.608005753	4.149838595	0.227309982	698.3460744	705.4983543	694.7751919	0.304241664	402.3667528	2514.96666	659.5397875	16.74527669	19.07912829	3.961433868	51.72965467
353.9095698	402.9675026	318.9170058	435.9473881	496.9390476	3.418372141	218.9097562	913.5232558	0.283415896	508.8552404	513.0496817	667.9003067	1.486792925	142.9188934	258.4556573	2.256032803	70.89677034	51.52165933	61.23276662	501.248613	214.748643	6.608041555	4.149517203	0.22738317	697.7008606	704.4646312	694.652165	0.304170224	405.3250811	2514.222529	659.2268318	16.74703568	19.09962644	3.835362169	51.35741489
353.9011094	402.9647851	318.9094548	435.9426534	496.9336487	3.419891841	218.9017429	913.525452	0.283403771	508.8833356	513.0259728	667.700099	1.493148586	142.5273363	258.7574557	2.256043172	70.71627811	51.38471352	60.8751325	501.2762546	214.7804206	6.608248269	4.149234924	0.227436952	697.0955622	703.473651	694.5327086	0.304072355	408.7917072	2512.988587	658.9463222	16.74953486	19.05224	3.88317007	51.07245885
353.8925116	402.9620659	318.9018099	435.9378667	496.9282025	3.42140971	218.8936565	913.5276864	0.283391665	508.8913717	513.0036213	667.5528715	1.498670405	142.1894355	258.986921	2.256049638	70.55133975	51.2370795	60.51859382	501.3075486	214.8086406	6.608570801	4.149028331	0.227455203	696.6287852	702.6568638	694.4372142	0.303942361	412.5818013	2511.208602	658.72712	16.75281505	19.03720882	3.74471281	50.94029511
353.8837775	402.9593451	318.8940718	435.9330282	496.9227093	3.422925727	218.8854976	913.5299587	0.283379579	508.8754862	512.9837536	667.4305658	1.503689127	141.8920338	259.1618201	2.256051098	70.39457029	51.07815362	60.16416535	501.3330975	214.8379933	6.608930428	4.148904339	0.227436781	696.3567605	702.0484247	694.3911345	0.303769387	416.6804997	2509.188112	658.5416153	16.75668474	19.08217269	3.85777255	51.5980822
353.8749081	402.9566225	318.8862413	435.9281385	496.9171695	3.424439872	218.8772669	913.5322686	0.283367512	508.8225101	512.968734	667.3555609	1.507476336	141.6649845	259.25085	2.25604532	70.27454855	50.92113886	59.83988144	501.3488375	214.8686229	6.60925412	4.148906114	0.227361091	696.4051525	701.8133993	694.4253012	0.303546012	420.8444176	2506.882317	658.4218667	16.76120549	19.05350318	3.881445444	51.5151913
353.8659046	402.9538981	318.8783192	435.9231977	496.9115836	3.425952126	218.868965	913.5346159	0.283355465	508.7148774	512.9619899	667.3476227	1.509242253	141.5478902	259.2173402	2.256029871	70.23310559	50.78761893	59.58427896	501.346576	214.9023493	6.609361941	4.149092855	0.227204654	696.9572983	702.1822322	694.576345	0.303262972	424.6744431	2504.344091	658.4025205	16.76625582	18.94365115	3.932449839	51.81415887
353.8567679	402.9511719	318.8703062	435.9182065	496.9059519	3.427462469	218.8605923	913.5370002	0.283343438	508.5537197	512.9640618	667.4022625	1.50901177	141.5389166	259.0655347	2.256004844	70.27185317	50.68007015	59.40347969	501.3243235	214.9395631	6.609221115	4.149461024	0.226971229	698.0151703	703.1586498	694.8462658	0.302923214	428.0481942	2501.670106	658.4797349	16.77173592	18.82577859	3.899447396	51.70567543
353.8474991	402.9484438	318.8622032	435.913165	496.9002747	3.428970882	218.8521496	913.5394212	0.283331431	508.3542331	512.9732098	667.5247706	1.506962539	141.6235991	258.8080031	2.2559725	70.37531004	50.59055616	59.28736101	501.2908624	214.975802	6.608953389	4.149965343	0.226681505	699.4315352	704.5919069	695.1993063	0.302546157	430.9745334	2498.751092	658.650985	16.77772613	18.7220813	3.927423295	51.4230411
353.8380993	402.9457138	318.854011	435.9080738	496.8945526	3.430477344	218.8436375	913.5418786	0.283319444	508.1329236	512.9881592	667.6879465	1.503837801	141.7710474	258.4824805	2.255935578	70.51987007	50.51201244	59.22079302	501.2475468	215.01093	6.608568254	4.150553532	0.226364836	701.0752034	706.3187133	695.602863	0.302147751	433.4293339	2495.800218	658.8810312	16.78394062	18.68873591	3.84379678	51.44641201
353.8285695	402.9429818	318.8457303	435.9029332	496.8887858	3.431981837	218.8350565	913.544372	0.283307476	507.9192345	513.0061473	667.8280621	1.501279819	141.9139311	258.1690494	2.255898834	70.65132544	50.42619061	59.16464268	501.1948782	215.0466917	6.608091193	4.151128792	0.226073997	702.7095596	708.0227981	696.0027914	0.301749759	435.539144	2493.273087	659.0891253	16.78984477	18.76842782	3.978167433	51.78407524
353.8189107	402.9402478	318.8373619	435.8977435	496.8829749	3.433484339	218.8264072	913.5469012	0.283295528	507.7293301	513.0256179	667.9302271	1.499738931	142.0285723	257.8953828	2.255865027	70.75677025	50.32927134	59.11245835	501.1365502	215.0813804	6.607533101	4.151639899	0.225837145	704.2011467	709.5572242	696.3648635	0.301373874	437.1638025	2491.265823	659.2534635	16.79527006	18.67366086	3.947880932	51.73285078
353.7992105	402.9347737	318.8203654	435.8872188	496.8712217	3.436483297	218.8089062	913.5520657	0.283271691	507.5607507	513.0472922	668.0131642	1.498599969	142.1341274	257.6421662	2.255834158	70.86881194	50.23634858	59.09554172	501.0724694	215.11332	6.606789397	4.152095643	0.225653761	705.5862297	711.0034079	696.6918979	0.301033801	437.8301642	2489.709121	659.39926	16.79897061	18.60120705	3.89597453	51.433518
353.7891711	402.9320334	318.8117388	435.8818844	496.8652804	3.437979712	218.8000557	913.5547003	0.283259802	507.4328091	513.0690561	668.0588567	1.498358862	142.2026313	257.4420022	2.255809677	70.97688149	50.14467425	59.10941543	501.0069873	215.1405679	6.605847686	4.152433851	0.225558669	706.7068815	712.1915295	696.9421287	0.300758047	437.3049051	2488.705875	659.5007056	16.80325303	18.56527135	3.936774705	51.49798937
353.7790071	402.9292909	318.8030276	435.8765026	496.8592963	3.439474059	218.7911393	913.5573695	0.283247933	507.370837	513.0877215	668.0524664	1.499555554	142.2007347	257.3312343	2.255796049	71.0664962	50.04850086	59.14547932	500.9486643	215.1592912	6.604739637	4.15257388	0.225595045	707.343935	712.8909974	697.0576244	0.300583971	435.3543271	2488.276418	659.5319778	16.80673916	18.47726676	3.823924525	50.99384434
353.7687193	402.9265462	318.7942328	435.8710737	496.85327	3.440966318	218.7821576	913.5600728	0.283236084	507.3770222	513.1029702	667.9956325	1.502097069	142.1308885	257.3051428	2.255793733	71.14119806	49.95322429	59.2043401	500.8994199	215.1695755	6.603479124	4.152511173	0.225760217	707.4840455	713.0944569	697.0330808	0.300515673	431.9592795	2488.398495	659.4942281	16.80952331	18.29983561	3.905073651	51.23052344
353.7583088	402.9237992	318.785355	435.8655981	496.8472018	3.442456469	218.7731113	913.5628101	0.283224254	507.4441087	513.1155834	667.8825432	1.506018956	142.0005808	257.3512571	2.255801234	71.190028	49.86201207	59.26809846	500.8576699	215.1753742	6.602148474	4.152273294	0.226026131	707.1944487	712.8506501	696.8879626	0.300530216	427.560868	2489.114866	659.381812	16.81181438	18.19165439	3.994007415	51.63646563
353.7477768	402.92105	318.776395	435.8600761	496.8410921	3.443944492	218.7640009	913.5655809	0.283212444	507.5579419	513.126792	667.7320998	1.510727191	141.8396337	257.429668	2.255816047	71.22462293	49.78595686	59.33612571	500.823549	215.1790099	6.600818199	4.151911052	0.226351769	706.5959968	712.2969511	696.6521844	0.300605118	422.4541747	2490.273661	659.2189381	16.81403662	18.2849612	3.908786138	51.05208283
353.7371242	402.9182983	318.7673537	435.8545083	496.8349412	3.445430368	218.754827	913.568385	0.283200653	507.6851848	513.139914	667.5901914	1.514818527	141.7150716	257.4562564	2.255832432	71.28171451	49.74777703	59.42383373	500.7943364	215.1841587	6.599548667	4.151538816	0.226658106	705.9736471	711.7679264	696.395876	0.300696521	416.9966828	2491.561308	659.0665772	16.81691013	18.43919104	3.879436618	51.48463061
353.7263521	402.9155442	318.7582318	435.8488949	496.8287496	3.446914077	218.7455902	913.571222	0.283188883	507.8169384	513.1551222	667.4641037	1.518023465	141.6446953	257.402846	2.255848796	71.35999888	49.75430018	59.51600169	500.7718611	215.1938164	6.59844846	4.151190997	0.226909353	705.4003958	711.3337861	696.1368302	0.300783013	411.6393464	2492.853457	658.9330212	16.82087307	18.41588316	4.016493819	52.31421557
353.7154615	402.9127877	318.7490302	435.8432363	496.8225177	3.4483956	218.7362912	913.5740917	0.283177132	507.9702254	513.1691297	667.3338423	1.520936315	141.6026964	257.2909677	2.255868159	71.43424729	49.80029904	59.5805382	500.7644723	215.2082008	6.597639359	4.150816852	0.227118979	704.7231904	710.8085678	695.8339309	0.300877018	406.6824355	2494.122384	658.7867565	16.82610765	18.2761814	3.970348717	51.11960051
353.7044535	402.9100287	318.7397495	435.837533	496.8162458	3.449874916	218.7269304	913.5769937	0.2831654	508.1355035	513.1815993	667.2068814	1.523299249	141.6081582	257.0878594	2.255888849	71.49958753	49.89202966	59.59368591	500.7756414	215.2308947	6.597272186	4.150454248	0.227244404	704.0150503	710.2571756	695.5041949	0.300952657	402.7414954	2495.184904	658.6350719	16.83319403	18.21133607	3.947531307	51.31127018
353.6933292	402.9072671	318.7303907	435.8317853	496.8099343	3.451352005	218.7175086	913.5799277	0.283153688	508.3001678	513.1922857	667.0871554	1.52493569	141.6813607	256.7573516	2.255908567	71.54344065	50.03423335	59.52053314	500.8084116	215.2670972	6.597541527	4.150152149	0.227232153	703.3726203	709.7556747	695.171753	0.300972962	400.6713765	2495.859736	658.4810969	16.84280896	18.28947203	4.202269262	52.10680917
353.6820896	402.9045029	318.7209544	435.8259936	496.8035837	3.45282685	218.7080263	913.5828934	0.283141996	508.4636426	513.2005199	666.9750223	1.525925952	141.8164591	256.3085202	2.25592726	71.56182605	50.22086575	59.35579237	500.8633376	215.3149862	6.598441128	4.149910352	0.227085336	702.7899791	709.2877469	694.8349588	0.300936628	400.5786343	2496.129124	658.3245239	16.85482487	18.30655392	3.96827162	51.66996158
353.6707357	402.9017361	318.7114415	435.8201583	496.7971943	3.454299428	218.6984841	913.5858905	0.283130324	508.6183533	513.2076512	666.8868836	1.526000929	142.0123037	255.7608129	2.255943727	71.57570268	50.44264486	59.13494698	500.9337338	215.3675703	6.599754841	4.149741647	0.22682827	702.3226573	708.9286	694.5092265	0.300852793	401.9515856	2496.066111	658.1902016	16.86847656	18.35557724	3.94531348	51.15554868
353.6592686	402.8989666	318.7018528	435.8142798	496.7907664	3.455769721	218.6888826	913.5889188	0.283118671	508.7692749	513.2132566	666.8191821	1.525492437	142.2417295	255.1633386	2.255958932	71.58596334	50.68108724	58.87666799	501.0154218	215.417329	6.601290563	4.149617536	0.226508147	701.9153908	708.6142224	694.1822199	0.300741996	404.3426786	2495.831813	658.0756175	16.88284001	18.32395654	3.82486897	51.99956042
353.6476893	402.8961944	318.692189	435.8083584	496.7843006	3.45723771	218.6792224	913.5919777	0.283107038	508.9367988	513.2156161	666.7530373	1.525283944	142.4442588	254.613507	2.25597659	71.58625601	50.90486716	58.60842324	501.1038525	215.4519532	6.602738463	4.14945248	0.226223095	701.3797456	708.13564	693.808381	0.300654524	406.8592893	2495.758432	657.9585223	16.89634721	18.35046798	3.84449635	51.78351506
353.635999	402.8934195	318.682451	435.8023945	496.7777971	3.458703374	218.6695041	913.5950672	0.283095424	509.1161628	513.2152428	666.695858	1.525456055	142.6044369	254.1494079	2.255995959	71.5843716	51.09405311	58.35448277	501.1923462	215.4633878	6.603884577	4.149247677	0.226008551	700.7363996	707.5111386	693.3953105	0.300599212	409.1145791	2495.956442	657.8518117	16.90802913	18.29657063	3.932869886	51.41021335
353.6241985	402.8906417	318.6726395	435.7963886	496.7712564	3.460166694	218.6597283	913.5981868	0.283083831	509.2846934	513.2134016	666.6679866	1.525638071	142.7408789	253.7557551	2.25601306	71.58498728	51.23810244	58.11310741	501.2760403	215.4497295	6.604706468	4.149071367	0.225836471	700.1508619	706.8996856	692.9868999	0.30054311	411.5077708	2496.303588	657.7838105	16.91773569	18.26461524	3.759561724	51.82398012
353.6122891	402.887861	318.6627553	435.790341	496.7646789	3.461627649	218.6498957	913.6013362	0.283072256	509.4336197	513.2110148	666.6801761	1.525908804	142.8369749	253.4772403	2.256026436	71.59723725	51.31060463	57.91370603	501.345737	215.4011504	6.604940301	4.148933889	0.22574726	699.6702987	706.3440186	692.5985809	0.300492201	413.6113145	2496.927473	657.7729838	16.92426032	18.23465969	3.912064968	52.44102635
353.6002717	402.8850775	318.6527992	435.7842521	496.7580649	3.463086221	218.6400067	913.6045151	0.283060702	509.5493051	513.2099716	666.7510479	1.52620162	142.8784806	253.3635518	2.256033801	71.64001639	51.28143796	57.80238968	501.3885023	215.3053191	6.604228702	4.148856408	0.225789462	699.3805512	705.9358708	692.2566359	0.300453879	414.7721932	2497.990192	657.850104	16.92608075	18.19452176	3.996685014	51.73470464
353.5881474	402.882291	318.642772	435.7781223	496.7514148	3.46454239	218.630062	913.6077233	0.283049167	509.6254166	513.2105335	666.8817834	1.526439486	142.869616	253.4131987	2.256034409	71.71298368	51.14998796	57.78302413	501.4021671	215.1636229	6.602588921	4.148851679	0.225957187	699.3183971	705.7149744	691.9747936	0.300423534	415.0103968	2499.50044	658.0180977	16.92307634	18.1621931	3.880679865	51.61942311
353.5759173	402.8795015	318.6326745	435.7719519	496.7447291	3.465996135	218.6200622	913.6109603	0.283037651	509.6751186	513.2109098	667.0470279	1.526846032	142.8093794	253.6113709	2.256031293	71.79920742	50.93855899	57.83717676	501.3936163	214.9869421	6.600274241	4.148877329	0.226235365	699.3723762	705.5740686	691.7298953	0.300414271	414.4403183	2501.48557	658.2414948	16.91592585	18.20052679	3.824814357	52.19151062
353.5635823	402.876709	318.6225074	435.7657414	496.7380081	3.467447438	218.610008	913.614226	0.283026156	509.6978397	513.2105248	667.2351116	1.527228998	142.7206648	253.9120523	2.256025068	71.88852769	50.67491272	57.94469166	501.3683769	214.7885489	6.597591755	4.148937642	0.226575735	699.5435173	705.5275782	691.527844	0.300416734	413.4483009	2503.857517	658.5032334	16.90562432	18.11318266	3.853273208	51.37239178
353.5511435	402.8739134	318.6122716	435.7594912	496.7312521	3.468896278	218.5998998	913.6175199	0.283014679	509.6892332	513.2085495	667.4320239	1.527112495	142.6538042	254.2159142	2.256015859	71.96339626	50.40995837	58.05794231	501.3381089	214.5921112	6.595123244	4.149060462	0.226874028	699.8715302	705.6339552	691.3845503	0.300400299	413.0097178	2506.356729	658.7802555	16.89426803	18.08319153	3.771386173	51.35181518
353.5386021	402.8711147	318.6019679	435.7532016	496.7244617	3.470342636	218.5897383	913.6208418	0.283003223	509.6536077	513.2043919	667.6191445	1.526450001	142.6235682	254.4898096	2.256005293	72.0126997	50.1711733	58.16521608	501.3072122	214.411035	6.593147328	4.149229838	0.227098081	700.3163539	705.8703009	691.2977703	0.300367804	413.26209	2508.988261	659.0475357	16.88264224	18.161705	3.771630351	51.89459676
353.525959	402.8683128	318.591597	435.746873	496.7176371	3.471786492	218.5795241	913.6241913	0.282991786	509.5910265	513.1989711	667.7888159	1.525360378	142.6195572	254.7615515	2.255994094	72.04069147	49.95486554	58.29914608	501.2685679	214.245408	6.591561496	4.149425157	0.227280067	700.8587931	706.2353485	691.2726079	0.300340225	413.5642222	2511.974855	659.3001787	16.87000874	18.369846	4.090044685	51.40960748
353.5132153	402.8655076	318.5811597	435.7405058	496.7107788	3.473227827	218.5692578	913.6275682	0.282980368	509.5075548	513.1918793	667.9174616	1.523784556	142.6599573	254.9914201	2.255984397	72.03543047	49.79577469	58.45032102	501.2267535	214.1118612	6.590692866	4.149623727	0.227384192	701.4463832	706.7021073	691.3060478	0.300324073	413.9794931	2515.354084	659.5071931	16.85728467	18.55543886	3.85524706	51.13815423
353.500372	402.8626993	318.5706568	435.7341003	496.7038872	3.47466662	218.55894	913.6309721	0.282968971	509.4172574	513.1820774	667.9697448	1.521775735	142.7617184	255.1336917	2.25597995	71.97890398	49.73948113	58.60334677	501.1894665	214.0315604	6.590965958	4.149779064	0.22737164	701.9662359	707.1872663	691.3810572	0.300334675	414.5498226	2519.192154	659.6212288	16.84568856	18.6635193	3.934352366	51.7303306
353.4874302	402.8598876	318.5600892	435.7276571	496.6969625	3.476102853	218.5485713	913.6344027	0.282957592	509.3236527	513.1698932	667.9435739	1.519387601	142.921388	255.1894629	2.255981112	71.8736298	49.78884295	58.75753786	501.1567959	214.0056413	6.592350855	4.149883307	0.227246009	702.399946	707.6761963	691.4972822	0.300374972	415.1475837	2523.408231	659.6384287	16.83531568	18.8805432	4.108297581	51.63976845
353.4743909	402.8570726	318.5494575	435.7211764	496.6900054	3.477536504	218.5381522	913.6378597	0.282946234	509.2238437	513.1559506	667.8616196	1.516566089	143.1327578	255.1624941	2.255985638	71.73182154	49.92726961	58.8946133	501.1297729	214.0249687	6.594636429	4.149968209	0.227007569	702.8024971	708.2018686	691.664298	0.300423384	416.0192956	2527.61091	659.5829413	16.82626521	19.15564126	3.980487645	51.06505612
353.4612552	402.8542541	318.5387626	435.7146586	496.683016	3.478967555	218.5276835	913.6413428	0.282934895	509.1198411	513.1411274	667.7440554	1.513479968	143.3712832	255.0904742	2.25599209	71.56962614	50.12658195	59.01552016	501.1055409	214.0752085	6.597449304	4.150042191	0.22669445	703.1865977	708.7552118	691.88231	0.300476048	416.9528789	2531.543967	659.477768	16.8179784	19.40525187	3.924588338	51.00050289
353.4480242	402.8514323	318.5280053	435.7081042	496.6759949	3.480395987	218.5171656	913.6448517	0.282923575	509.0105124	513.1272543	667.6305023	1.510453365	143.5870039	255.0631188	2.255997435	71.41839435	50.32367222	59.14175549	501.074178	214.1257705	6.600022733	4.150122526	0.226396278	703.5950011	709.3397008	692.1550391	0.300532553	417.3482251	2534.939123	659.3724989	16.80877677	19.46270624	4.00984117	51.41691979
353.4346988	402.848607	318.5171863	435.7015135	496.6689423	3.481821778	218.5065992	913.648386	0.282912275	508.90184	513.1150344	667.539461	1.507605891	143.7620374	255.09816	2.256000606	71.29286777	50.50093786	59.25931094	501.036972	214.1657316	6.602066227	4.150216643	0.226133383	704.0258046	709.9324417	692.4778012	0.300583947	417.1844848	2537.41646	659.2850922	16.79866944	19.43412211	3.852130225	51.06885436
353.4212802	402.8457781	318.5063065	435.6948868	496.6618588	3.48324491	218.4959849	913.6519455	0.282900995	508.8112291	513.1040469	667.4573423	1.504970263	143.9055597	255.1517791	2.256003842	71.18877332	50.6904266	59.33288525	501.0046234	214.2062965	6.603782994	4.150297898	0.225871256	704.3882545	710.4510916	692.8304127	0.300628988	416.7014558	2538.65922	659.1900967	16.78911687	19.55094575	3.992557737	50.88321234
353.4077694	402.8429456	318.4953666	435.6882247	496.6547446	3.484665362	218.4853233	913.6555299	0.282889734	508.7493956	513.0950081	667.4050039	1.502708365	143.9960941	255.2410249	2.256006288	71.12348943	50.87440846	59.34088942	500.980478	214.2349076	6.604840799	4.150369286	0.22563218	704.661045	710.8488722	693.2009514	0.300657964	415.9025133	2538.181192	659.1061249	16.78030341	19.54114213	3.894527592	51.5242157
353.3941674	402.8401096	318.4843675	435.6815274	496.6476002	3.486083116	218.4746149	913.6591388	0.282878492	508.7270485	513.0887097	667.4126594	1.500956098	144.010416	255.3818108	2.256006312	71.11860355	51.02933067	59.25129226	500.9694236	214.2350973	6.604836656	4.150445648	0.225436396	704.8391805	711.0846379	693.5775196	0.300651957	414.9496716	2535.337189	659.061299	16.77253395	19.60528951	3.829655984	51.24091445
353.3804752	402.8372699	318.4733098	435.6747954	496.6404259	3.487498151	218.4638604	913.6627719	0.28286727	508.7473728	513.0851299	667.4764615	1.499768084	143.9510076	255.5604765	2.256004305	71.17322343	51.15426281	59.06165704	500.9733053	214.2077419	6.603807659	4.150522523	0.225284106	704.9001888	711.1368292	693.9455452	0.300610842	413.9085819	2530.177182	659.0512568	16.76627491	19.60669462	3.864575115	50.99004324
353.3666941	402.8344264	318.4621945	435.668029	496.6332222	3.488910448	218.4530604	913.6664289	0.282856068	508.7980037	513.0842049	667.5816462	1.499182672	143.8268652	255.7768619	2.256000314	71.27750774	51.23466174	58.81394134	500.9844143	214.1549527	6.601878688	4.150600813	0.225194878	704.8667779	711.0443427	694.2971937	0.300547417	412.5805542	2523.407868	659.070499	16.76115263	19.57502402	3.950813506	51.63401472
353.3528248	402.8315793	318.4510222	435.6612287	496.6259894	3.490319987	218.4422155	913.6701095	0.282844885	508.8711179	513.0852644	667.7019734	1.499137853	143.6637905	255.9921092	2.255995529	71.41295442	51.27994926	58.53149614	501.0012232	214.0890731	6.599426325	4.1506746	0.225152642	704.7331068	710.8273173	694.6176694	0.300470714	411.0689052	2515.687954	659.0964423	16.75771272	19.49658547	3.85185548	51.17750753
353.3388687	402.8287283	318.4397938	435.6543947	496.6187279	3.491726749	218.4313262	913.6738134	0.282833722	508.9561087	513.0867407	667.7826119	1.499445172	143.5152187	256.1238513	2.255993048	71.54115056	51.32865494	58.24531955	501.0239486	214.0399318	6.597269066	4.150723206	0.22510545	704.4690544	710.5114028	694.8872224	0.300398727	409.6166526	2508.096616	659.0757229	16.75716652	19.49968823	3.824979589	51.22538134
353.3248266	402.8258735	318.4285101	435.6475276	496.6114382	3.493130713	218.4203932	913.6775403	0.282822578	509.0419507	513.0880937	667.8047361	1.500093964	143.3998683	256.1489765	2.255993282	71.64732245	51.37266971	57.98808908	501.0484798	214.0128443	6.595660717	4.150748489	0.225056675	704.0867848	710.1256164	695.0874104	0.300340067	408.2775059	2501.383115	658.997439	16.7596984	19.2900583	3.913448074	50.61253512
353.3106996	402.8230148	318.4171719	435.6406276	496.6041205	3.494531859	218.4094171	913.6812898	0.282811454	509.1254651	513.0896069	667.7858518	1.501226941	143.3047562	256.0845751	2.25599453	71.74098297	51.37127454	57.76933403	501.072549	213.9916608	6.594342035	4.150769597	0.225044896	703.6103683	709.6690897	695.1952601	0.300287618	407.1276446	2495.680928	658.8874177	16.76513942	19.08978423	3.86251974	51.94839284
353.2964888	402.8201522	318.4057798	435.6336952	496.5967753	3.495930169	218.3983985	913.6850617	0.282800349	509.1916698	513.0905344	667.7060425	1.502825575	143.2517513	255.9057783	2.255996975	71.80455932	51.30953538	57.62997975	501.0907894	213.9806173	6.593597943	4.150793352	0.225077308	703.064039	709.1824354	695.1873314	0.300250326	406.2732876	2491.930389	658.7367594	16.77362199	18.9729495	3.840468576	51.03361232
353.2821952	402.8172856	318.3943348	435.6267308	496.589403	3.497325623	218.3873379	913.6888556	0.282789264	509.2182443	513.0900399	667.5419666	1.504866234	143.2654997	255.5934325	2.256000509	71.8166038	51.16348612	57.63036256	501.0937688	213.9832852	6.593744179	4.1508313	0.22517101	702.4947135	708.7330843	695.0405733	0.300241616	405.7463456	2491.38068	658.5381371	16.78492486	18.92678712	4.014919902	51.06769814
353.26782	402.8144149	318.3828377	435.6197347	496.582004	3.4987182	218.376236	913.6926712	0.282778199	509.2037623	513.0883256	667.3022101	1.507303979	143.3465935	255.1584035	2.256004662	71.7784569	50.93006784	57.77229395	501.0808493	213.9967818	6.594742638	4.150885765	0.225329403	701.9283097	708.3387405	694.760031	0.30026014	405.5919625	2494.054123	658.3024619	16.79857705	18.90184218	3.847684167	51.72376583
353.253364	402.8115403	318.3712891	435.6127073	496.5745786	3.500107882	218.3650933	913.6965082	0.282767152	509.1613265	513.0860442	667.0021936	1.509951428	143.4944446	254.6148488	2.256010026	71.6967531	50.65010367	58.01660446	501.0585436	214.0268572	6.596566434	4.150938368	0.225517217	701.3666453	707.9935375	694.3838461	0.300300995	405.853803	2499.197974	658.0339407	16.8140174	18.88871031	3.947317532	50.99431375
353.2388284	402.8086615	318.35969	435.605649	496.5671273	3.501494648	218.3539105	913.7003664	0.282756126	509.1035308	513.0843436	666.6771521	1.512705678	143.6904136	254.0091632	2.256015736	71.59032827	50.33976313	58.32474976	501.0311425	214.0660779	6.598892605	4.150983102	0.225727879	700.8366988	707.6951106	693.9514085	0.30035406	406.4942594	2505.889784	657.7601818	16.83008146	18.86154895	3.821804315	51.98154508
353.2242143	402.8057785	318.348041	435.5985603	496.5596504	3.502878478	218.3426881	913.7042453	0.282745118	509.0560497	513.0853726	666.3952275	1.515504223	143.8887019	253.4284089	2.256019785	71.50043617	50.01341212	58.62142733	501.007012	214.0946494	6.60098163	4.151015366	0.225964439	700.3679448	707.4118676	693.521885	0.300396847	407.4169793	2512.30899	657.5351173	16.84502324	18.90244126	3.907768945	51.26223133
353.2095226	402.8028914	318.336343	435.5914414	496.5521483	3.504259354	218.3314269	913.7081447	0.28273413	509.0279234	513.0900543	666.1862847	1.51813251	144.0806107	252.9148552	2.256021641	71.43913662	49.70003649	58.87225874	500.9898067	214.1109949	6.602651632	4.151026585	0.226205416	700.0036707	707.166123	693.1463721	0.300422109	408.6144247	2517.650338	657.3809393	16.85741081	18.95532715	3.911632912	51.81796391
353.1947545	402.8	318.3245968	435.5842928	496.5446214	3.505637255	218.3201272	913.7120643	0.282723162	509.005321	513.0980628	666.0461688	1.520309747	144.2888609	252.4757949	2.256021285	71.39131192	49.41652941	59.10073615	500.9747886	214.1235577	6.604171435	4.151017303	0.226430498	699.8203264	707.0454394	692.8547203	0.300437314	410.1465831	2522.384457	657.299221	16.8659563	18.94150036	3.798454967	51.18303586
353.1799109	402.7971043	318.3128031	435.5771148	496.5370701	3.507012161	218.3087898	913.7160037	0.282712213	508.996685	513.1104533	666.0109562	1.5217332	144.5045367	252.1663159	2.256017976	71.36999859	49.20023109	59.26822402	500.965357	214.131361	6.605342819	4.150978703	0.226610926	699.8836375	707.0917112	692.716221	0.30043446	411.9910406	2525.568438	657.3173131	16.86868343	18.88905733	3.890387442	52.20284186
353.164993	402.7942043	318.3009628	435.5699079	496.5294948	3.508384054	218.2974153	913.7199627	0.282701284	509.0148782	513.1284688	666.1208877	1.522006632	144.7191221	252.047167	2.256011289	71.3898179	49.10811701	59.32067566	500.9671983	214.1372446	6.605978306	4.150894547	0.226700311	700.2611959	707.3487115	692.8199008	0.300404281	414.1199774	2525.947555	657.4616098	16.86336494	18.73494328	3.900391766	50.9512518
353.1500017	402.7913	318.2890765	435.5626723	496.5218959	3.509752913	218.2860043	913.7239409	0.282690374	509.0573759	513.151939	666.3714508	1.521118598	144.9319156	252.1206123	2.256001307	71.44618332	49.14683456	59.26060093	500.9791372	214.1425814	6.606122116	4.150767078	0.226692391	700.9498412	707.8172744	693.1654952	0.300349201	416.4899282	2523.558256	657.727393	16.84994792	18.73559742	3.979687848	52.43289757
353.1349381	402.7883912	318.2771453	435.5554086	496.5142737	3.511118718	218.2745572	913.727938	0.282679483	509.1226328	513.1801551	666.7370032	1.519489003	145.1271863	252.3555418	2.255988292	71.53442901	49.28279101	59.10512982	500.999121	214.140493	6.605731487	4.150610438	0.226618887	701.8501502	708.4076725	693.6793116	0.300273014	418.9829764	2518.800272	658.092473	16.83045233	18.79003298	3.985139225	50.78252856
353.1198034	402.7854779	318.2651697	435.5481171	496.5066287	3.51248145	218.2630749	913.7319537	0.282668612	509.1996432	513.2117389	667.1717245	1.517453179	145.3082716	252.6986407	2.255973225	71.63424909	49.49024906	58.89336849	501.022303	214.1336289	6.605055804	4.150437889	0.226498204	702.8722266	709.0609508	694.2846983	0.300187513	421.5207621	2512.605348	658.5180017	16.80702921	18.87568377	3.923736407	51.83836462
353.1045984	402.7825601	318.2531506	435.5407982	496.4989613	3.513841089	218.2515577	913.7359877	0.282657761	509.2620304	513.2439736	667.5876147	1.515546087	145.4956238	253.0433249	2.255957924	71.70308556	49.71658748	58.71382589	501.0379247	214.1299867	6.604681766	4.150273466	0.226365559	703.8831321	709.7069034	694.8446064	0.300117009	424.0423585	2507.063132	658.9336094	16.78333701	18.90685726	3.959051586	50.30179826
353.0893244	402.7796378	318.2410888	435.5334523	496.4912717	3.515197616	218.2400064	913.7400397	0.282646929	509.3043906	513.2757025	667.9437536	1.514166317	145.680163	253.3448936	2.255943281	71.7271004	49.93891443	58.59070714	501.0427758	214.1294747	6.604728636	4.150130283	0.226239887	704.7703205	710.258443	695.2837449	0.300070243	426.3904689	2502.746534	659.3010415	16.76163707	18.81086683	3.960246227	51.34653623
353.0739822	402.7767109	318.2289851	435.5260796	496.4835605	3.51655101	218.2284216	913.7441094	0.282636116	509.3384028	513.3073175	668.2480807	1.513367807	145.8359887	253.627084	2.255929414	71.71574556	50.18326936	58.48579333	501.0404775	214.130564	6.604984454	4.150005605	0.226103675	705.4855245	710.660488	695.6181884	0.300042625	428.3532906	2498.748344	659.6157277	16.74200528	18.68550322	3.897642202	50.41889439
353.058573	402.7737793	318.2168402	435.5186808	496.475828	3.517901252	218.2168038	913.7481964	0.282625323	509.3593572	513.3374296	668.4497647	1.513654117	145.9491675	253.8349555	2.255917531	71.6533834	50.42494045	58.42359985	501.0277697	214.1337565	6.605577099	4.149914226	0.225977622	705.880391	710.7969373	695.7573773	0.300044358	429.705578	2495.652634	659.8280559	16.72730901	18.66623269	3.779006649	50.44810884
353.0430979	402.770843	318.204655	435.511256	496.4680746	3.519248323	218.2051537	913.7523004	0.282614549	509.3637747	513.3644001	668.4872335	1.515725914	145.9975497	253.898627	2.255909028	71.52432408	50.62481192	58.4323636	501.0012566	214.1367047	6.606595412	4.149875529	0.225896389	705.7568625	710.5061314	695.5794374	0.300086402	430.1623667	2494.139143	659.8779459	16.7213708	18.65928007	3.895961304	50.37349224
353.0275578	402.767902	318.1924302	435.5038058	496.4603007	3.520592202	218.1934717	913.7564212	0.282603794	509.3531047	513.3874014	668.3592489	1.519513254	145.9767975	253.8183469	2.255904224	71.33293254	50.78006418	58.50701961	500.9622042	214.1394013	6.607951224	4.149890659	0.225861997	705.1087685	709.7851842	695.0888447	0.300167285	429.6587001	2494.154717	659.7623213	16.72434504	18.54456047	3.843583776	49.99431342
353.0119538	402.7649563	318.1801666	435.4963304	496.4525066	3.52193287	218.1817587	913.7605584	0.282593059	509.3218419	513.4052276	668.0893825	1.524425089	145.9119518	253.6142291	2.255902958	71.08757945	50.88784141	58.65355683	500.9118489	214.1451344	6.609606635	4.149953877	0.225871051	704.0730484	708.7648296	694.3500246	0.300282446	428.3833817	2495.974064	659.5103005	16.73435172	18.53492134	4.04173281	51.53891993
352.9962871	402.7620057	318.1678651	435.4888304	496.4446929	3.523270308	218.170015	913.7647118	0.282582343	509.2756467	513.417416	667.7251187	1.529794856	145.8123249	253.3380451	2.255904646	70.81202481	50.96088856	58.84384454	500.8554954	214.1533016	6.611274767	4.150053527	0.22591154	702.7956466	707.5663666	693.4604192	0.300419151	426.4635339	2499.070552	659.1667427	16.74885413	18.59949792	4.025639718	50.62387368
352.9805585	402.7590502	318.1555264	435.481306	496.4368597	3.524604495	218.1582414	913.7688809	0.282571647	509.2303832	513.4245058	667.3684443	1.534414107	145.688759	253.1069233	2.255907704	70.55297886	51.04392914	59.00717496	500.8039979	214.1619688	6.612391821	4.150162662	0.2259462	701.5528724	706.4078269	692.6191412	0.300551338	424.1335399	2501.948738	658.8239916	16.76249596	18.66018983	3.902775461	52.12279255
352.9647692	402.7560899	318.1431512	435.4737576	496.4290076	3.525935411	218.1464384	913.7730655	0.28256097	509.1876036	513.4252362	667.0529593	1.53765857	145.5573818	252.9497615	2.255911968	70.3301294	51.13286575	59.13231939	500.7616224	214.1718493	6.612743606	4.150272554	0.225975056	700.4771142	705.4081885	691.9021606	0.300669081	421.5407556	2504.529184	658.5171135	16.77337738	18.52585735	3.998997033	50.86424071
352.9489202	402.7531245	318.1307405	435.4661857	496.421137	3.527263038	218.1346067	913.7772653	0.282550313	509.1413438	513.4169481	666.7417153	1.539675765	145.4220464	252.8097733	2.255918757	70.13981965	51.18047247	59.2509658	500.727506	214.1837395	6.612359337	4.150393351	0.226034389	699.5004409	704.5287967	691.2492223	0.300777045	418.6174975	2507.732622	658.2157429	16.78371758	18.30723297	3.904590877	51.15884398
352.9330126	402.7501542	318.1182949	435.4585906	496.4132481	3.528587356	218.1227468	913.7814799	0.282539675	509.0936136	513.3979742	666.4727127	1.539738637	145.3033708	252.7147114	2.255927974	70.00645107	51.17513784	59.35256336	500.7069957	214.1982773	6.610979176	4.150514496	0.226129779	698.7764715	703.9088219	690.7451359	0.300863168	415.5531079	2511.554988	657.960541	16.79147351	18.12985393	3.930123301	51.47660663
352.9170474	402.7471788	318.1058153	435.4509727	496.4053415	3.529908344	218.1108593	913.7857091	0.282529056	509.043845	513.3663018	666.2930352	1.536905537	145.234591	252.6965705	2.25593942	69.95723562	51.10073983	59.43224998	500.7057554	214.2173057	6.608350645	4.15062254	0.22626825	698.5153222	703.7411503	690.4966808	0.300913749	412.6448692	2516.17714	657.804687	16.79388402	18.36125357	3.890830759	50.87890111
352.9010257	402.7441984	318.0933024	435.4433324	496.3974175	3.531225983	218.0989448	913.7899525	0.282518457	508.9925019	513.3226214	666.1995872	1.531289551	145.2188541	252.7453505	2.255952939	69.98950524	50.94988088	59.4953687	500.7233181	214.2407348	6.60455688	4.150714791	0.226451932	698.7132782	704.0221859	690.4962947	0.30092789	409.9685865	2521.653767	657.7464173	16.79123245	18.12582115	3.922765079	51.60958328
352.8849485	402.7412128	318.0807571	435.4356701	496.3894764	3.532540253	218.087004	913.7942099	0.282507877	508.9464544	513.2714648	666.1901459	1.523513524	145.239049	252.8699049	2.255967304	70.08715451	50.75419851	59.52749527	500.7566862	214.2664543	6.599854777	4.1507852	0.226652203	699.2988313	704.6666401	690.7197097	0.300906898	407.550113	2527.20536	657.7767588	16.78387057	18.32504465	3.877262007	50.77380031
352.8688168	402.738222	318.06818	435.4279861	496.3815188	3.533851135	218.0750374	913.7984808	0.282497316	508.9055613	513.2165378	666.2266759	1.514523703	145.2810975	253.0314514	2.255982019	70.22003143	50.51894398	59.5452915	500.7995227	214.2936793	6.594689958	4.150836519	0.226860467	700.1235731	705.5354734	691.0769998	0.300860271	405.3800605	2532.788033	657.8567535	16.77403553	18.49759822	3.865309995	51.89478439
352.8526318	402.735226	318.0555721	435.4202809	496.3735448	3.535158609	218.0630456	913.8027651	0.282486775	508.8656298	513.162811	666.2164162	1.506146146	145.31402	253.1346545	2.255997057	70.32935363	50.23923588	59.59200793	500.8392974	214.321377	6.589852651	4.150883907	0.227076735	700.8549153	706.3311216	691.3639102	0.300811108	403.2887786	2538.745161	657.8934533	16.76704922	18.51658917	3.873260866	51.22221645
352.8363945	402.7322247	318.0429341	435.4125549	496.3655551	3.536462655	218.0510293	913.8070623	0.282476253	508.8300378	513.115376	666.1435018	1.49921293	145.3278699	253.1644976	2.256011182	70.38971831	49.93371573	59.67192525	500.870769	214.3480016	6.585774756	4.150921946	0.227280345	701.3992845	706.9526589	691.5256326	0.300764139	401.3857155	2544.668062	657.8688076	16.76395528	18.4692279	3.971565887	51.25849204
352.8201058	402.7292181	318.0302668	435.4048083	496.3575499	3.537763253	218.0389889	913.8113723	0.28246575	508.8047957	513.0775886	666.0561956	1.493467952	145.3430504	253.1617238	2.256022649	70.4098913	49.61899953	59.76919443	500.8959096	214.3727219	6.582522526	4.150928993	0.227449854	701.9027985	707.5101391	691.6405639	0.300707578	400.0686783	2549.992882	657.8322341	16.76217789	18.50585732	3.854175393	51.88558475
352.8037669	402.7262062	318.017571	435.3970417	496.3495296	3.539060385	218.0269252	913.8156946	0.282455267	508.7942519	513.0561602	665.9412801	1.489901729	145.35071	253.1133888	2.256029697	70.35907572	49.32088212	59.88825215	500.9082887	214.393512	6.580643055	4.150895992	0.227557319	702.2699491	707.8940875	691.6498155	0.300646387	399.5264184	2554.176165	657.7684536	16.7643382	18.9095995	3.899533435	50.86561186
352.7873789	402.7231888	318.0048474	435.3892553	496.3414946	3.540354029	218.0148387	913.8200289	0.282444803	508.8056196	513.0598798	665.7890069	1.489729996	145.3357894	253.0163231	2.256029921	70.200158	49.08280871	60.02562259	500.9002253	214.4073731	6.580786248	4.150810627	0.227560174	702.3864081	707.9672295	691.4904817	0.300585974	399.9715724	2556.300779	657.6628113	16.7695004	18.88819657	3.790273143	51.73322285
352.7709427	402.720166	317.9920969	435.3814496	496.3334453	3.541644167	218.00273	913.824375	0.282434359	508.8395073	513.0891291	665.607659	1.492935715	145.3001162	252.8775017	2.256023183	69.94112725	48.91983819	60.17560074	500.8724987	214.4144354	6.582963502	4.150669849	0.227451762	702.2766157	707.7484235	691.1745598	0.300526473	401.4320633	2556.270789	657.5244023	16.77729888	19.27623562	3.806314637	51.2466869
352.7544594	402.7171377	317.9793203	435.373625	496.3253822	3.542930779	217.9905997	913.8287325	0.282423933	508.8880551	513.137188	665.3784691	1.499050261	145.240421	252.6755684	2.256011962	69.61109842	48.82264064	60.34377843	500.8291848	214.4174319	6.586810915	4.150491397	0.227260671	701.9333278	707.2620464	690.6943944	0.300474799	403.5422616	2554.902965	657.3385441	16.78877974	19.32281371	3.916741722	51.81205586
352.7379301	402.7141039	317.9665182	435.3657819	496.3173055	3.544213845	217.9784484	913.8331012	0.282413527	508.9472637	513.1974614	665.1237693	1.50708577	145.1649898	252.4317142	2.255998077	69.25712808	48.79535962	60.51543219	500.7781633	214.4187605	6.591781431	4.150282012	0.227004431	701.477043	706.6372753	690.1208213	0.30042842	406.0895804	2552.625637	657.1309279	16.80271197	19.38953118	3.946599441	51.73563857
352.7213558	402.7110645	317.9536916	435.3579205	496.3092157	3.545493345	217.9662768	913.8374806	0.282403141	509.0114493	513.2579537	664.9033552	1.514929466	145.0994254	252.2011481	2.255984416	68.96696001	48.83295622	60.66074275	500.7352406	214.4225824	6.596791657	4.150047762	0.226716531	701.1965365	706.1684479	689.6225985	0.300375466	408.8277742	2550.136179	656.9676348	16.81568651	19.41582663	3.93838322	51.76907193
352.7047375	402.7080195	317.9408413	435.3500414	496.3011131	3.54676926	217.9540853	913.8418705	0.282392774	509.0744976	513.3119906	664.721411	1.521853206	145.0432603	251.9906608	2.255973145	68.78184435	48.94618043	60.77024817	500.7064998	214.4314229	6.601371206	4.14980194	0.226414701	701.1482392	705.930394	689.2332412	0.300319938	411.4210187	2547.977171	656.8560354	16.82743094	19.64454612	3.948006618	52.09518137
352.6880764	402.7049688	317.9279679	435.3421449	496.2929982	3.548041569	217.9418747	913.8462707	0.282382426	509.1346233	513.3612049	664.5520248	1.528519653	144.9763244	251.7850174	2.255964393	68.6940364	49.17636992	60.84335688	500.688237	214.4449901	6.605756432	4.149552611	0.226082547	701.2143508	705.8131504	688.886349	0.300275675	413.6620967	2546.030415	656.7688173	16.83944271	19.48171956	3.822229338	51.65108836
352.6713734	402.7019123	317.9150723	435.3342314	496.2848714	3.549310254	217.9296455	913.8506807	0.282372097	509.1839312	513.3974435	664.397634	1.534084524	144.8948226	251.5933332	2.25596085	68.7525317	49.5417755	60.86769169	500.6874418	214.4662942	6.609378116	4.149317921	0.225739718	701.4497657	705.895176	688.6164415	0.300249312	415.0973476	2544.937325	656.7117217	16.85149678	19.40346668	3.902429065	52.31491611
352.6546297	402.6988502	317.9021552	435.3263013	496.2767329	3.550575294	217.9173982	913.8551002	0.282361788	509.2106855	513.4094988	664.2488333	1.53752498	144.791005	251.4145249	2.255966353	69.01598308	50.05560601	60.83416321	500.7124184	214.4994517	6.611505004	4.149125788	0.225418841	701.8915563	706.2530014	688.448127	0.300251464	415.0782242	2545.704468	656.6797709	16.86396926	19.5558191	3.749037426	51.45382454
352.6378462	402.6957822	317.8892176	435.3183549	496.2685833	3.55183667	217.9051336	913.859529	0.282351497	509.2106102	513.3950548	664.1008458	1.538846167	144.6624382	251.2483893	2.255980499	69.4784576	50.70978716	60.74207408	500.7616213	214.5444839	6.612099545	4.148982653	0.225125998	702.5043035	706.8562996	688.3757899	0.300284386	413.5567499	2548.249576	656.6643307	16.87697433	19.78818182	3.828574262	52.54641702
352.621024	402.6927083	317.8762601	435.3103927	496.2604229	3.553094363	217.8928522	913.8639667	0.282341227	509.1832052	513.3543503	663.9739001	1.538072063	144.5256182	251.1109873	2.256000127	70.10388155	51.45104928	60.59302762	500.8305504	214.5993687	6.611297181	4.14887843	0.224866675	703.3001191	707.6968529	688.434153	0.3003352	410.9786278	2551.885244	656.67635	16.88912445	19.83181378	3.852703721	51.71054608
352.6041642	402.6896286	317.8632835	435.302415	496.2522521	3.554348351	217.8805546	913.8684131	0.282330975	509.1272814	513.2901816	663.8591434	1.535940222	144.3830808	250.9942594	2.256021655	70.83113444	52.23416704	60.39895798	500.9094585	214.6612197	6.609546136	4.148807564	0.22463828	704.1675294	708.6497937	688.58758	0.300399566	407.7352402	2555.83099	656.69565	16.90065207	19.81191659	3.827433385	53.27757648
352.5872678	402.6865429	317.8502887	435.2944222	496.2440713	3.555598617	217.8682413	913.8728677	0.282320743	509.0458829	513.212609	663.7314532	1.534300394	144.2321863	250.8741164	2.256038534	71.54129677	53.00339171	60.18460569	500.9789109	214.7240024	6.607938713	4.148753741	0.224417068	704.8689332	709.4471347	688.7354675	0.300473111	404.5707561	2558.567847	656.6792452	16.91269872	19.51894176	3.826085269	52.38543612
352.5703358	402.6834513	317.8372764	435.2864147	496.2358808	3.556845139	217.8559131	913.8773304	0.28231053	508.935026	513.1209929	663.5904798	1.5334422	144.0809232	250.7519101	2.256047448	72.18129408	53.69424702	59.95917616	501.0311723	214.7854288	6.606684491	4.148715329	0.224214131	705.3319778	710.0071408	688.8737408	0.300547885	401.840874	2559.430561	656.6142026	16.92486615	19.65354389	3.851190459	52.31169107
352.5533693	402.6803536	317.8242474	435.278393	496.2276812	3.558087899	217.8435705	913.8818007	0.282300336	508.7818769	513.0038093	663.440448	1.532332789	143.9351469	250.6398609	2.256049294	72.76759891	54.25525882	59.7187174	501.0695915	214.847488	6.605145852	4.148713837	0.224072656	705.5870919	710.3846217	689.0541634	0.30062158	399.2891447	2558.817733	656.4988708	16.93637894	19.35925396	3.860962811	52.40533697
352.5363694	402.6772499	317.8112025	435.2703572	496.2194726	3.559326876	217.831214	913.8862784	0.282290162	508.5804526	512.859137	663.2793491	1.531213802	143.8046847	250.5390971	2.256040239	73.23596113	54.59931157	59.47558096	501.085088	214.9075884	6.603506822	4.148749972	0.22401192	705.5461729	710.4839884	689.2746026	0.300684062	397.3126137	2556.001072	656.3154583	16.9467636	18.98943941	3.749874858	52.44339838
352.5193372	402.67414	317.7981425	435.262308	496.2112556	3.560562052	217.8188444	913.8907632	0.282280007	508.3251147	512.6851523	663.1139175	1.530273851	143.7071213	250.4570156	2.256015329	73.50818065	54.61305648	59.24392937	501.0672496	214.9623697	6.601979691	4.148819918	0.224055411	705.1353032	710.2161673	689.5505137	0.300718732	396.4920669	2550.031207	656.0517311	16.9549414	18.86576304	4.005335987	52.74558867
352.5022735	402.6710239	317.7850681	435.2542456	496.2030306	3.561793405	217.8064621	913.8952548	0.282269871	508.0214732	512.4850281	662.9471755	1.529406832	143.6448705	250.3953301	2.255975387	73.57680659	54.28669769	59.02837552	501.0179006	215.0114998	6.600506668	4.148923081	0.224207957	704.3706626	709.5962393	689.8816147	0.300723509	396.8245275	2541.069035	655.7132251	16.96072845	18.85458642	4.024174159	52.21126406
352.4851796	402.6679017	317.7719803	435.2461704	496.1947978	3.563020917	217.7940678	913.8997527	0.282259754	507.6936282	512.2752536	662.7757391	1.529154516	143.6072619	250.342312	2.255924061	73.45420316	53.70323056	58.83417706	500.9433512	215.0545369	6.599368791	4.149044816	0.22443285	703.2883681	708.6484291	690.2121183	0.300706214	398.1718507	2529.637876	655.3161571	16.96508457	18.86478882	3.96485078	52.93397316
352.4680565	402.6647732	317.7588796	435.2380829	496.1865578	3.564244568	217.7816621	913.9042568	0.282249657	507.362561	512.0670189	662.608573	1.529236447	143.5889157	250.299135	2.255866805	73.18614349	52.93973293	58.65921537	500.856174	215.0929628	6.598379257	4.149178358	0.224712189	702.0103534	707.4942192	690.5354528	0.300672666	400.1856074	2516.731695	654.8920776	16.96818885	18.83462593	4.14554227	51.73319827
352.4509051	402.6616384	317.745767	435.2299833	496.1783108	3.565464338	217.7692457	913.9087667	0.282239579	507.0549688	511.8716527	662.461232	1.528666917	143.5784552	250.2721858	2.255813911	72.88546452	52.13748388	58.49020617	500.7808755	215.1313885	6.596889606	4.149323105	0.225026875	700.7748984	706.3865588	690.8673909	0.300636462	402.0202896	2504.344085	654.4950753	16.97025505	18.67877986	3.958577497	53.06641678
352.4337266	402.6584973	317.7326433	435.2218722	496.1700574	3.566680208	217.7568189	913.9132821	0.28222952	506.7995711	511.706768	662.3405071	1.527603348	143.5708248	250.256191	2.255770313	72.57577572	51.37385363	58.33265774	500.7280383	215.169847	6.594994902	4.149462557	0.225346726	699.6838277	705.415357	691.1765816	0.300601297	403.5043692	2493.295001	654.1561168	16.97172757	18.50169745	4.008999112	51.33318823
352.416522	402.6553498	317.7195092	435.2137498	496.1617978	3.567892157	217.7443826	913.9178027	0.28221948	506.6184153	511.5889377	662.2509687	1.52679361	143.5743907	250.2439296	2.25573507	72.19465024	50.62156877	58.2082736	500.6946455	215.2045088	6.593230112	4.149573028	0.22565441	698.7230923	704.536796	691.4239123	0.300556224	405.1198615	2483.251759	653.8835922	16.97255682	18.42735941	3.995955041	52.91256389
352.3992923	402.6521959	317.7063654	435.2056166	496.1535324	3.569100166	217.7319373	913.9223282	0.282209459	506.549364	511.5416258	662.2022208	1.52651922	143.5843636	250.2277867	2.2557141	71.76650035	49.9744751	58.12586575	500.6934734	215.2350386	6.591785012	4.14963016	0.225909345	698.0229427	703.8622932	691.5687616	0.300504042	406.7250542	2475.181175	653.7176723	16.97327726	18.31185501	3.900101339	51.86599906
352.3820387	402.6490354	317.6932129	435.1974729	496.1452618	3.570304216	217.7194835	913.9268583	0.282199458	506.6408824	511.5957342	662.202574	1.527376496	143.5915952	250.1939298	2.255714615	71.32105992	49.56514483	58.09638027	500.739503	215.2607946	6.591031124	4.149600703	0.22605129	697.729855	703.5119646	691.5455473	0.300450439	408.1607721	2470.213762	653.7057668	16.97487944	18.15072601	3.816637808	52.92665076
352.3647621	402.6458685	317.6800523	435.1893191	496.1369861	3.571504286	217.7070219	913.9313926	0.282189476	506.8955151	511.7525713	662.2532867	1.52946059	143.5968354	250.1413338	2.255736189	70.86453377	49.40163089	58.12080968	500.8312261	215.2810485	6.591078785	4.149483698	0.226071977	697.8498134	703.4890961	691.349915	0.300394853	409.4723948	2468.390017	653.8495203	16.97737565	17.88341277	3.849935001	51.86422689
352.3474636	402.642695	317.6668846	435.1811557	496.1287059	3.572700357	217.6945531	913.9359308	0.282179513	507.2748742	511.9847216	662.3501787	1.531965063	143.6009156	250.0827945	2.255774927	70.4431537	49.44567488	58.1782909	500.960266	215.2977223	6.591480787	4.149315181	0.226004005	698.332649	703.7768365	691.0435576	0.300341147	410.4445478	2469.488156	654.121262	16.98017884	17.91759636	3.920375603	52.79059065
352.3301443	402.6395149	317.6537104	435.172983	496.1204215	3.573892409	217.6820777	913.9404727	0.282169569	507.74188	512.2681307	662.4847081	1.534685689	143.6082436	250.0246111	2.255824105	70.05781507	49.62633989	58.25789636	501.1109125	215.3103136	6.592189158	4.149122432	0.225873326	699.0596258	704.2755988	690.6639289	0.300287746	411.2216013	2472.682066	654.4816529	16.98282732	17.90167644	3.928859211	52.24492451
352.3128052	402.6363281	317.6405305	435.1648013	496.1121333	3.575080423	217.6695962	913.9450179	0.282159645	508.2301985	512.5615434	662.6403471	1.537486376	143.6313476	249.9768919	2.255870256	69.66620986	49.77306271	58.34822268	501.2520554	215.3167718	6.59324205	4.148948463	0.225734946	699.7750156	704.7555991	690.2715991	0.30022609	412.2991177	2476.055889	654.8536126	16.98434414	17.91080564	3.94717186	53.48597901
352.2954473	402.6331347	317.6273458	435.1566112	496.1038417	3.576264378	217.6571093	913.9495661	0.28214974	508.7009595	512.8383754	662.8099361	1.539951965	143.6709961	249.9472889	2.255907769	69.30595734	49.84995107	58.43005336	501.3707685	215.3178795	6.594466878	4.148824566	0.225609059	700.3974006	705.1615545	689.9141409	0.30015922	413.6293938	2479.088886	655.2032697	16.98436543	17.76208711	3.951529089	51.90423395
352.2780717	402.6299345	317.614157	435.1484129	496.0955471	3.577444256	217.6446176	913.954117	0.282139854	509.1601914	513.0997607	662.9966405	1.54196646	143.7175657	249.9331057	2.255939334	69.06255801	49.96346795	58.48883823	501.4726208	215.3153107	6.595849389	4.148751852	0.225461802	701.0202617	705.5933538	689.5909181	0.300097935	414.8565046	2482.555515	655.5482858	16.9834228	17.97280026	3.918827753	53.35265841
352.2606795	402.6267275	317.6009649	435.1402068	496.0872499	3.578620036	217.6321216	913.9586703	0.282129987	509.5596036	513.3125835	663.1913341	1.543038037	143.7703205	249.9428892	2.255958233	68.99252765	50.08384558	58.49819025	501.5421899	215.3103688	6.597187044	4.148768431	0.225313277	701.550383	705.9905469	689.3603323	0.300047693	415.8839238	2485.853585	655.8479915	16.98117975	17.99913752	3.92360046	51.78388256
352.2432717	402.6235136	317.5877703	435.1319934	496.0789504	3.579791699	217.6196221	913.9632256	0.282120139	509.8328437	513.4309841	663.3823833	1.542313663	143.8276119	249.9904922	2.25595622	69.17689885	50.17093695	58.42052099	501.5609728	215.3056077	6.59806025	4.14892825	0.225197219	701.8737309	706.2875532	689.3088612	0.300016884	416.4877914	2488.283333	656.0494158	16.97711128	18.30220898	3.917630676	52.89557054
352.2258493	402.6202929	317.574574	435.123773	496.0706491	3.580959225	217.6071194	913.9677827	0.28211031	509.9748947	513.4516607	663.5669447	1.539801613	143.8859737	250.0747147	2.255933957	69.61982102	50.23763414	58.25370905	501.5294492	215.3018431	6.59842027	4.149226693	0.225112043	701.9909473	706.4887651	689.4426582	0.300008205	416.5939722	2489.841312	656.1499628	16.97142119	18.25919931	3.936607829	51.89415581
352.2084134	402.6170653	317.5613768	435.1155459	496.0623463	3.582122594	217.5946144	913.9723413	0.282100501	510.0084105	513.3930596	663.7430172	1.536143439	143.9471422	250.1868245	2.255895064	70.21474194	50.24783529	58.02702558	501.4537785	215.2976862	6.598458064	4.149622403	0.225060532	701.8897532	706.5561561	689.7239403	0.300013505	416.4867485	2490.274967	656.1594156	16.96441397	18.64491027	3.989239997	53.05878536
352.1909651	402.6138307	317.5481795	435.1073127	496.0540424	3.583281787	217.5821075	913.976901	0.282090711	509.9697285	513.2809247	663.9132576	1.531850476	144.0063528	250.3165595	2.255847264	70.89740219	50.23785375	57.76511905	501.3495961	215.2933256	6.598258579	4.1500671	0.225026543	701.6484985	706.5424056	690.1087632	0.300030992	416.1655306	2490.04066	656.1098516	16.95673916	18.70281722	3.844460127	51.40030347
352.1735054	402.6105891	317.5349828	435.0990736	496.0457379	3.584436784	217.5695994	913.9814615	0.28208094	509.9430403	513.1727999	664.0890444	1.527882847	144.0537597	250.4434134	2.255806636	71.57993768	50.32169084	57.51261243	501.2508526	215.2888696	6.59806156	4.150470799	0.224960661	701.4765355	706.6028892	690.4987597	0.300059086	415.5425826	2490.491928	656.0797826	16.94970261	18.77287249	4.021619651	52.45932553
352.1560353	402.6073405	317.5217876	435.0908291	496.037433	3.585587565	217.5570906	913.9860225	0.282071188	509.9498662	513.085882	664.2678032	1.52473689	144.0862032	250.5588458	2.255778821	72.17330682	50.49228005	57.29369725	501.1682376	215.2845907	6.597896683	4.150789368	0.224864212	701.3907358	706.7341211	690.8632887	0.300094303	414.7100856	2491.603618	656.083955	16.94380501	18.78092719	3.754032828	51.18431629
352.1385559	402.6040847	317.5085946	435.0825796	496.0291283	3.586734111	217.5445818	913.9905837	0.282061455	509.9423433	512.9905776	664.4341824	1.522146957	144.1027063	250.6687221	2.255759221	72.64770458	50.66746908	57.09751211	501.0900931	215.2823868	6.597452197	4.151037082	0.224780524	701.2519277	706.8222877	691.2551792	0.300138005	413.6943021	2492.316039	656.0759036	16.93883415	18.97509438	3.847110607	52.02981414
352.1210683	402.6008218	317.4954046	435.0743254	496.020824	3.587876401	217.5320736	913.9951448	0.282051741	509.9410735	512.9044508	664.5833916	1.520658675	144.099459	250.7638358	2.255754219	72.88983353	50.82639486	56.95197612	501.0284816	215.2829256	6.596703299	4.151162848	0.224718441	701.0632246	706.8489704	691.6436556	0.300186091	412.6036836	2492.468477	656.0682579	16.93534658	18.98015061	3.77324191	51.47809618
352.1035734	402.5975518	317.4822185	435.0660668	496.0125206	3.589014417	217.5195665	913.9997055	0.282042047	509.9745649	512.8519816	664.7096184	1.521052386	144.074394	250.8323329	2.255771309	72.7362364	50.92151953	56.89731278	500.9975087	215.2862632	6.595680817	4.151100705	0.224693029	700.8120372	706.7698882	691.983824	0.300230289	411.6856475	2491.717666	656.0755129	16.93393728	18.92886153	3.937467317	52.04610564
352.0860724	402.5942744	317.4690369	435.0578044	496.0042185	3.590148137	217.5070611	914.0042655	0.282032371	510.0372336	512.8301253	664.8121572	1.523278564	144.029239	250.8747843	2.255809317	72.18417252	50.93496619	56.93401479	500.9961009	215.2912365	6.594386525	4.150855874	0.224714665	700.4845711	706.5711191	692.2782089	0.300269774	411.0053127	2489.906668	656.0944552	16.93450648	18.74493365	3.927438044	52.10920506
352.0685663	402.5909898	317.4558608	435.0495385	495.995918	3.591277544	217.4945581	914.0088244	0.282022715	510.1394425	512.8421677	664.9047376	1.52700419	143.9684128	250.8939411	2.255865653	71.34685705	50.9289927	57.04861719	501.0240771	215.2941212	6.593041009	4.150463199	0.224760302	700.1763966	706.3462345	692.5160904	0.300307295	410.5069494	2487.791115	656.148214	16.93674687	18.58167559	3.974864488	51.53714033
352.0510562	402.5876979	317.4426908	435.0412695	495.9876196	3.592402617	217.4820581	914.0133819	0.282013078	510.2580749	512.86991	664.9936868	1.531640184	143.8998989	250.8990187	2.255932176	70.33688489	50.90084024	57.2166748	501.0690925	215.2912394	6.591746559	4.149982453	0.224834878	699.8805008	706.10409	692.7225839	0.300344688	410.228906	2485.389813	656.2261701	16.93992166	18.51025799	3.950238939	52.31135729
352.033543	402.5843986	317.4295278	435.0329977	495.9793236	3.593523336	217.4695616	914.0179378	0.28200346	510.3279332	512.8645464	665.0842242	1.535918172	143.8366576	250.9111406	2.255991636	69.36897997	50.82552159	57.38184863	501.1013323	215.2780194	6.590527928	4.149534671	0.224957306	699.5250485	705.8194389	692.9743912	0.300387704	410.1632038	2482.380794	656.2855806	16.9425688	18.27797605	3.893430696	51.17548881
352.0160279	402.5810919	317.4163725	435.0247235	495.9710304	3.594639681	217.4570693	914.0224917	0.281993861	510.3475032	512.8222962	665.1885479	1.539396168	143.787843	250.9364975	2.256038369	68.5459503	50.71873555	57.52947138	501.1152461	215.2495292	6.589594254	4.149168746	0.225123088	699.1554151	705.5391142	693.27036	0.300436161	410.3862755	2479.132739	656.3365638	16.94402914	18.39266214	3.946305831	51.95376842
351.9985119	402.5777778	317.4032258	435.0164474	495.9627404	3.595751634	217.4445817	914.0270433	0.281984281	510.360504	512.7741706	665.31728	1.542479885	143.7589003	250.9677817	2.256076943	67.81091832	50.58106985	57.68832943	501.1249772	215.2015684	6.589202851	4.148858102	0.225328175	698.8532642	705.308297	693.5497547	0.300482221	411.1387731	2476.071689	656.4194096	16.94438209	18.49024543	3.872815571	50.86453653
351.980996	402.5744561	317.3900884	435.0081697	495.954454	3.596859174	217.4320994	914.0315922	0.281974721	510.3718665	512.7202128	665.4872888	1.544675299	143.7623868	251.0121365	2.256100922	67.28105757	50.42913939	57.8444018	501.1253032	215.127579	6.589645228	4.148660121	0.225566443	698.6832353	705.1884835	693.8025812	0.300524119	412.5527624	2473.709557	656.5517931	16.94278208	18.6631149	4.009670491	51.66048232
351.9634813	402.5711269	317.3769612	434.9998907	495.9461716	3.597962281	217.4196231	914.0361383	0.281965179	510.3967147	512.6655747	665.7228484	1.545384201	143.8132422	251.0775636	2.256103331	67.11824269	50.30943567	57.98006646	501.1120783	215.0193731	6.591330884	4.148644659	0.225818561	698.7604248	705.2878155	694.0082884	0.300560494	414.7434389	2472.965766	656.7654589	16.93824626	18.87625302	3.924763017	51.47001615
351.9459689	402.5677901	317.3638448	434.991611	495.9378935	3.599060936	217.4071534	914.0406811	0.281955656	510.4451699	512.6162898	666.0223971	1.54462467	143.9121901	251.1636691	2.256084712	67.31894751	50.22438862	58.09674921	501.0874926	214.8781194	6.594266112	4.148809721	0.226076591	699.0976518	705.6118724	694.1506951	0.300588655	417.6891725	2473.986245	657.0643245	16.93076546	19.11095804	3.835029368	51.44108332
351.9284598	402.5644457	317.3507402	434.9833308	495.9296202	3.600155119	217.3946908	914.0452204	0.281946153	510.491564	512.5552391	666.3598641	1.542422774	144.0485122	251.2713766	2.256045857	67.83021214	50.14525685	58.18369406	501.0461736	214.7139483	6.598024253	4.149135714	0.226341807	699.582858	706.0675429	694.2587555	0.300609828	421.1077358	2476.139332	657.403794	16.92076694	19.24160057	3.808832801	52.56411701
351.910955	402.5610936	317.337648	434.9750506	495.9213521	3.601244811	217.3822359	914.0497558	0.281936669	510.5447204	512.4895738	666.7128825	1.53923304	144.2098414	251.3940117	2.255993637	68.53910983	50.06298002	58.2522722	500.9955782	214.5368917	6.602273047	4.149565504	0.226603067	700.1654711	706.5989112	694.3191571	0.300621682	424.7625733	2479.165762	657.7672441	16.90907368	19.60842986	3.718087388	50.6989245
351.8934555	402.5577337	317.3245692	434.9667708	495.9130895	3.602329992	217.3697893	914.0542871	0.281927203	510.6319401	512.4421818	667.044738	1.53617327	144.3732844	251.5146683	2.255943674	69.19053217	49.955361	58.33956364	500.9553911	214.3630727	6.606476633	4.149971909	0.226847692	700.7696786	707.1097567	694.2952162	0.300619084	428.3456004	2482.5613	658.1378987	16.89739143	19.49770729	3.72101802	52.21543366
351.8759626	402.5543661	317.3115044	434.9584916	495.9048328	3.603410641	217.3573517	914.0588139	0.281917757	510.7513849	512.4112832	667.3313896	1.533462713	144.5271584	251.630952	2.255900121	69.71281814	49.81697288	58.44371193	500.9272026	214.2037272	6.610260406	4.15031781	0.227059827	701.3290901	707.5389048	694.1877867	0.300600914	431.5377969	2486.07156	658.4879586	16.88632018	19.46393352	3.768136217	51.34650756
351.8584771	402.5509907	317.2984544	434.9502136	495.8965825	3.60448674	217.3449237	914.0633359	0.28190833	510.8989865	512.3885311	667.5728682	1.530568373	144.675253	251.7518348	2.255857649	70.2166312	49.67802242	58.53678618	500.9020704	214.0614644	6.613623025	4.150650419	0.227212485	701.8591228	707.9131993	694.001659	0.300567073	434.1353649	2490.139414	658.8083041	16.87531427	19.33918621	3.979210521	52.07910099
351.8410001	402.5476074	317.2854201	434.9419371	495.8883388	3.605558268	217.3325057	914.0678528	0.281898922	511.0729357	512.3712938	667.7405094	1.527712082	144.8033209	251.8752769	2.255821015	70.62801582	49.54004917	58.61345916	500.8810443	213.9503585	6.616111403	4.150928475	0.22728123	702.2841236	708.1651805	693.7390113	0.300516637	435.7144046	2494.54092	659.0649854	16.86506588	19.16778168	3.861441854	51.09307333
351.8235328	402.5442162	317.2724022	434.9336625	495.8801023	3.606625207	217.3200985	914.0723642	0.281889533	511.2579623	512.3477058	667.795247	1.525098789	144.8921837	252.0002034	2.255795052	70.8590201	49.39714098	58.66161019	500.8617763	213.8887798	6.617089136	4.151104811	0.227240997	702.4802521	708.1904893	693.4196579	0.300450287	435.712368	2498.795471	659.2038399	16.85643237	18.94263359	3.918233481	51.95015237
351.8060761	402.5408171	317.2594015	434.9253901	495.8718732	3.607687535	217.3077026	914.07687	0.281880163	511.4496531	512.317135	667.7388426	1.522690171	144.9413178	252.1258999	2.255779518	70.91996341	49.25742881	58.67627932	500.8436237	213.8783295	6.616500766	4.151180497	0.22709016	702.4368888	707.9877087	693.0545645	0.300370383	434.0761592	2502.864659	659.2224031	16.8494612	18.97423241	3.917438631	51.62636195
351.7886311	402.53741	317.2464189	434.9171204	495.863652	3.608745234	217.2953187	914.0813697	0.281870812	511.6546631	512.2942313	667.5965798	1.520743278	144.9574081	252.2437798	2.255775914	70.78901265	49.11839796	58.6777161	500.8349535	213.9102527	6.614592631	4.151143967	0.226858684	702.19493	707.5939078	692.6456963	0.300280736	431.1703105	2506.63327	659.1555004	16.84422876	18.48875077	4.026561133	51.69614908
351.7711988	402.5339948	317.233455	434.9088537	495.855439	3.609798284	217.2829473	914.085863	0.28186148	511.864801	512.2811638	667.4008809	1.519050465	144.9529303	252.3526999	2.25577983	70.5411413	48.98849972	58.66569382	500.8347263	213.9733408	6.611696365	4.151030316	0.226573911	701.8012538	707.0661282	692.2151142	0.300187491	427.348607	2510.131051	659.03269	16.84025134	18.459249	3.929035008	52.05624613
351.7537803	402.5305716	317.2205108	434.9005904	495.8472347	3.610846665	217.270589	914.0903497	0.281852167	512.0681444	512.2786999	667.2147226	1.516953486	144.9559688	252.4564648	2.255779783	70.37443735	48.89014183	58.63163672	500.8368133	214.0439873	6.608566607	4.150935148	0.226278033	701.3759946	706.5375276	691.793446	0.300099477	423.290519	2513.73184	658.9125047	16.83617597	18.41327197	4.032786831	52.11105294
351.7363766	402.5271402	317.2075869	434.892331	495.8390395	3.611890358	217.2582444	914.0948294	0.281842873	512.2553049	512.2914354	667.0669241	1.514499356	144.9740874	252.5492602	2.255774535	70.31114403	48.82781768	58.58361974	500.8437809	214.1130579	6.605431824	4.15086592	0.226003704	700.9436884	706.0450509	691.4085598	0.300024622	419.3256499	2517.239734	658.8217198	16.83192875	18.4292688	3.961964185	52.27011055
351.7189888	402.5237007	317.1946841	434.8840758	495.8308536	3.612929342	217.2459141	914.0993018	0.281833598	512.4100371	512.3173768	666.9450637	1.512158678	144.9933508	252.6214405	2.255770379	70.24490804	48.79715009	58.52887564	500.859984	214.189326	6.601900765	4.150763218	0.225759668	700.4150811	705.5214298	691.0960267	0.2999702	415.2560825	2519.980106	658.7384615	16.8285079	18.46197368	3.940380856	52.02238206
351.701618	402.5202529	317.1818034	434.8758251	495.8226776	3.613963598	217.2335988	914.1037666	0.281824343	512.5166622	512.3601285	666.8829517	1.510039342	145.0211793	252.6650476	2.255766374	70.19164052	48.80227025	58.47804083	500.8884126	214.2621651	6.598213204	4.150630004	0.225588616	699.8080754	705.0031971	690.8970928	0.299947211	411.4699583	2521.608193	658.6919352	16.82593512	18.56147605	3.817520245	51.55046624
351.6842651	402.5167969	317.1689453	434.8675794	495.8145118	3.614993107	217.221299	914.1082235	0.281815106	512.560666	512.4283172	666.9240704	1.508398547	145.0669565	252.6681428	2.255762585	70.14874313	48.84297664	58.45226354	500.9356527	214.3169494	6.594708503	4.150460581	0.225548675	699.1537074	704.5380822	690.8556467	0.29996852	408.5209743	2521.672296	658.7248645	16.82431765	18.49212533	3.837020459	52.02267473
351.6669313	402.5133325	317.1561108	434.8593391	495.8063566	3.616017848	217.2090153	914.1126722	0.281805888	512.539078	512.5206347	667.0669281	1.507351848	145.1275344	252.6316254	2.255760365	70.1005164	48.91457929	58.45611267	501.0009777	214.3533092	6.591448072	4.150250254	0.225642853	698.4582723	704.1295721	690.9762746	0.300034052	406.4410522	2520.067048	658.8354506	16.82374995	18.74506453	3.949631283	51.90138649
351.6496176	402.5098599	317.1433006	434.8511045	495.7982124	3.617037802	217.1967483	914.1171124	0.281796689	512.4651691	512.6304303	667.2947717	1.506584689	145.2025006	252.5720429	2.255757083	70.10825523	49.01300747	58.47922028	501.075059	214.3719206	6.588674605	4.150042862	0.225837321	697.7866934	703.8125499	691.2188248	0.300131212	405.1326617	2517.364139	659.0126607	16.8235493	18.86594933	3.8257276	52.16456746
351.632325	402.5063788	317.1305155	434.842876	495.7900795	3.618052949	217.1844987	914.1215437	0.28178751	512.35245	512.7522828	667.5728225	1.506157734	145.2802993	252.5010851	2.255755528	70.14111999	49.12488744	58.52006425	501.1527991	214.3808971	6.58636172	4.149836075	0.226093722	697.1541011	703.572044	691.5432798	0.300247152	404.3169097	2513.824105	659.2282911	16.82370996	19.00102954	4.00118544	51.77737789
351.6150546	402.5028893	317.1177563	434.834654	495.7819584	3.61906327	217.1722669	914.1259658	0.281778349	512.2232301	512.8758236	667.8261228	1.506282177	145.3344853	252.4356157	2.255762796	70.10108123	49.22787204	58.57267718	501.2273504	214.4020505	6.584143769	4.149598998	0.226335143	696.5311128	703.3346639	691.8823579	0.300360212	403.271505	2509.750582	659.4156603	16.82463719	19.12382352	3.947897378	51.58288605
351.5978074	402.4993913	317.1050238	434.826439	495.7738494	3.620068745	217.1600537	914.1303785	0.281769207	512.0917721	512.9948486	668.0299023	1.506891661	145.3590763	252.3907293	2.25577933	69.99695751	49.3062496	58.63683275	501.291402	214.4372588	6.582238017	4.149353356	0.22653053	695.9747101	703.1198717	692.1920739	0.300456454	401.8972809	2505.545937	659.5589495	16.82594569	19.15319819	3.722175469	52.18466595
351.5805845	402.4958848	317.0923188	434.8182312	495.765753	3.621069354	217.1478596	914.1347814	0.281760084	511.9572286	513.1096529	668.209536	1.507948976	145.363466	252.3716633	2.255802426	69.88086858	49.3473989	58.72714545	501.3420687	214.4706232	6.581275652	4.149137543	0.226708449	695.5861714	703.0094104	692.4708784	0.300534828	400.707757	2501.318219	659.6907163	16.8270166	19.2113124	4.015815031	51.97061936
351.5633869	402.4923697	317.079642	434.8100311	495.7576695	3.622065077	217.1356851	914.1391742	0.28175098	511.8380099	513.2128494	668.3372295	1.509368587	145.3418337	252.3973492	2.255832238	69.76771275	49.32881656	58.84584704	501.3704032	214.5022727	6.581596807	4.148982173	0.226834761	695.447358	703.035287	692.6619209	0.300577697	399.6504165	2497.582232	659.7959548	16.82729514	19.16104579	3.885975001	51.85227287
351.5462157	402.488846	317.0669943	434.801839	495.7495993	3.623055895	217.123531	914.1435566	0.281741896	511.7599115	513.2947171	668.3796445	1.510895491	145.289949	252.4939138	2.255867187	69.70510577	49.22523051	58.99105731	501.3636738	214.5314423	6.583673775	4.148940377	0.226862074	695.6738229	703.2482434	692.6872833	0.300561516	398.662932	2495.144611	659.8579612	16.82585505	19.29131778	3.809850229	51.38944345
351.529072	402.4853136	317.0543764	434.7936554	495.7415428	3.624041788	217.1113978	914.1479282	0.28173283	511.7249434	513.3540027	668.3388813	1.512521711	145.2157201	252.656123	2.255905707	69.70539611	49.03733279	59.16113218	501.3214175	214.5551147	6.587542998	4.149018564	0.226794099	696.2752648	703.6529095	692.5435002	0.300486744	397.859372	2494.081378	659.8794739	16.82258428	19.49056075	3.877947803	51.52179158
351.5119567	402.4817725	317.0417892	434.7854806	495.7335004	3.625022736	217.0992861	914.1522889	0.281723783	511.7229755	513.3931958	668.2164307	1.514452172	145.1291585	252.854117	2.255948219	69.71733535	48.78964229	59.34349128	501.2522	214.5805207	6.592509904	4.149165893	0.226642493	697.1251237	704.1635172	692.2693665	0.30036838	397.0979208	2493.973854	659.8482238	16.81832384	19.66421242	3.873381161	51.76514885
351.494871	402.4782227	317.0292333	434.777315	495.7254725	3.62599872	217.0871965	914.1566382	0.281714755	511.739804	513.4167354	668.0399756	1.516748655	145.0516886	253.0565706	2.255991521	69.74529213	48.50925673	59.52874509	501.1643845	214.6041109	6.598186625	4.14935918	0.226443744	698.1421121	704.7421765	691.9151391	0.300225416	396.5759454	2494.455062	659.7787041	16.81349344	19.82989296	3.830408108	51.42697627
351.4778158	402.474664	317.0167097	434.769159	495.7174595	3.62696972	217.0751296	914.1609758	0.281705746	511.7433086	513.4356358	667.8764395	1.519527098	145.0199129	253.2110879	2.256029992	69.80832162	48.24242341	59.7087769	501.0739832	214.6142944	6.604089515	4.149563388	0.226282136	699.204231	705.3510212	691.5863544	0.300094868	396.8093345	2494.729534	659.7143978	16.80876071	19.97673739	3.922688041	51.74879114
351.4607923	402.4710966	317.004219	434.761013	495.7094617	3.627935716	217.063086	914.1653015	0.281696756	511.7255599	513.45305	667.7387498	1.522838809	145.0547578	253.2846193	2.256060716	69.89680245	48.01708251	59.86801007	500.9893139	214.6126462	6.609637431	4.149747427	0.22617775	700.2070669	705.924623	691.3187284	0.299992814	397.8290419	2494.535182	659.6557369	16.8046369	20.04253284	3.967295026	51.8429466
351.4438014	402.4675202	316.9917622	434.7528773	495.7014796	3.628896689	217.0510663	914.1696149	0.281687785	511.7064955	513.4634349	667.595179	1.526536522	145.1646438	253.2729946	2.256081416	70.01734474	47.83366016	59.9892413	500.9072664	214.6058605	6.614560912	4.149917141	0.226092059	701.1358692	706.4238128	691.0644974	0.29990977	399.4077334	2494.363753	659.5757039	16.80094185	20.1496082	3.847871061	51.57679603
351.4268443	402.4639349	316.9793399	434.7447525	495.6935135	3.629852618	217.0390711	914.1739157	0.281678832	511.6794627	513.4706355	667.458116	1.530633499	145.3759999	253.1359585	2.256088068	70.1621561	47.72703208	60.05063744	500.8379042	214.5969881	6.618105558	4.150036235	0.226044032	701.8598244	706.7634776	690.8603646	0.299864077	401.5386484	2493.973421	659.4722143	16.79825774	20.3174024	3.925716193	51.38790862
351.409922	402.4603406	316.9669529	434.7366387	495.6855638	3.630803485	217.027101	914.1782036	0.281669899	511.634737	513.4800246	667.3381484	1.535199912	145.7179778	252.8218581	2.256076945	70.30087048	47.74316362	60.02355059	500.7951116	214.5937396	6.619178009	4.150045831	0.226053279	702.1885116	706.8170389	690.7566311	0.299879691	404.0941203	2492.969422	659.3357121	16.79753184	20.13026233	3.860324824	51.82049848
351.3930355	402.4567374	316.9546022	434.7285365	495.6776309	3.631749269	217.0151566	914.1824783	0.281660985	511.5751765	513.4906999	667.2363997	1.540082165	146.1866191	252.3356809	2.256048069	70.43027692	47.88267707	59.90673582	500.7803717	214.5974678	6.617696747	4.149946605	0.226112609	702.1057671	706.5754323	690.754279	0.299955234	406.9950783	2491.41336	659.1679598	16.79872012	20.04935882	3.873704008	51.61679825
351.3761858	402.453125	316.9422883	434.7204461	495.6697153	3.632689951	217.0032385	914.1867394	0.281652089	511.4962589	513.5018672	667.1766586	1.545030127	146.7530278	251.7188101	2.256004838	70.56127164	48.12111883	59.72721529	500.7913026	214.599985	6.614346471	4.149771305	0.226229217	701.7010855	706.1258321	690.8657139	0.300082391	410.3765385	2489.27877	659.0016383	16.8012967	19.94365575	3.873267483	51.57797723
351.3593741	402.4495035	316.9300122	434.7123681	495.6618172	3.633625511	216.9913472	914.1909867	0.281643213	511.4068263	513.5088455	667.1547347	1.54973625	147.379861	251.0233803	2.255951983	70.69073703	48.42452211	59.50789238	500.8217334	214.6001089	6.609754408	4.149555392	0.226375832	701.0722814	705.5405898	691.0659441	0.300241619	414.1112906	2486.834186	658.8475129	16.80463881	20.01595451	3.859098427	51.57992931
351.3426014	402.4458729	316.9177746	434.7043028	495.6539372	3.634555929	216.9794835	914.1952199	0.281634355	511.3317679	513.5005473	667.1426468	1.553724588	148.0024263	250.3448842	2.255897716	70.82145472	48.72362615	59.28714697	500.855247	214.5972057	6.605158085	4.149372931	0.226486454	700.4330345	704.9575091	691.275802	0.300390142	417.9320186	2484.808994	658.7095681	16.80744765	19.69120849	3.983213269	51.16166555
351.3258687	402.4422331	316.9055763	434.6962505	495.6460754	3.635481186	216.9676479	914.1994386	0.281625517	511.2719225	513.4754149	667.1523762	1.556650138	148.581711	249.7335932	2.255847	70.94695755	48.99157159	59.08990416	500.8895959	214.5890883	6.601113326	4.149251516	0.226548449	699.8546269	704.4456221	691.4970589	0.300514817	421.7410562	2483.261811	658.6104281	16.80924758	19.51944774	3.802912136	51.27583294
351.309177	402.4385841	316.893418	434.6882116	495.6382325	3.636401261	216.9558409	914.2036425	0.281616697	511.2119372	513.4400477	667.2168893	1.55831227	149.1118117	249.1833923	2.255800557	71.04166312	49.25099008	58.91441959	500.936982	214.5783574	6.597158799	4.149160434	0.226584464	699.2254999	703.9605637	691.7944215	0.300631017	425.4307674	2481.725296	658.5711541	16.81054528	19.40851834	3.908606997	51.16835872
351.2925275	402.4349257	316.8813007	434.6801866	495.6304087	3.637316136	216.9440632	914.2078314	0.281607896	511.1504064	513.3938477	667.3535073	1.558287622	149.5429392	248.7555358	2.255764926	71.09201702	49.47170361	58.7911491	500.996004	214.5634748	6.593914269	4.14912796	0.226581035	698.6187661	703.5807867	692.1778069	0.300724459	428.8438763	2480.193654	658.6204211	16.81085662	19.60759877	3.980455434	51.43921324
351.2759212	402.431258	316.869225	434.6721759	495.6226044	3.638225791	216.9323154	914.2120048	0.281599114	511.0816549	513.3369278	667.5909164	1.55608875	149.8123328	248.5278968	2.255748468	71.08619627	49.61426892	58.76266426	501.0645842	214.5397809	6.59228337	4.149192902	0.22653077	698.142443	703.4214652	692.6668525	0.30077865	431.8768435	2478.58371	658.800942	16.80954384	19.61677636	3.820294654	51.32080201
351.2593591	402.427581	316.8571918	434.6641797	495.6148201	3.639130205	216.9205981	914.2161626	0.281590351	511.0051986	513.2727562	667.9301027	1.551760951	149.9221394	248.4964414	2.255751977	71.02044277	49.6793131	58.83203977	501.1419265	214.508311	6.592240493	4.149350269	0.226438734	697.7961544	703.4831814	693.2653656	0.300794487	434.4194641	2476.82808	659.112392	16.80668742	19.46799908	3.818152555	50.93460247
351.2428423	402.4238945	316.8452018	434.6561985	495.607056	3.64002936	216.9089118	914.2203043	0.281581607	510.9369637	513.2027293	668.3294381	1.545793972	149.9154984	248.6156599	2.255771908	70.91238028	49.67162889	58.9828143	501.217898	214.4723517	6.593574217	4.149592832	0.226298096	697.6047916	703.7352448	693.9166161	0.300769832	436.356005	2475.238429	659.5126096	16.80238898	19.73726397	3.805023659	50.77195796
351.2263718	402.4201986	316.8332559	434.6482327	495.5993127	3.640923235	216.8972573	914.2244296	0.281572882	510.8801729	513.1337043	668.7677744	1.538752924	149.8487629	248.8161842	2.255803179	70.77396056	49.6184581	59.19154535	501.2896926	214.434836	6.595707959	4.149888108	0.226129793	697.5178564	704.1103735	694.6064346	0.300718094	437.638325	2473.766232	659.968527	16.79719922	19.48124784	3.757414813	50.70463782
351.2099486	402.4164931	316.8213548	434.6402827	495.5915905	3.64181181	216.885635	914.2285384	0.281564175	510.8333493	513.0780768	669.2192463	1.531600338	149.8289578	248.9606715	2.255834777	70.62030891	49.5866388	59.40522233	501.359708	214.4017266	6.597254944	4.15016051	0.225981016	697.3709336	704.4466574	695.3368092	0.300673637	438.271404	2472.14985	660.4254532	16.7923964	19.29510763	3.736091972	50.6187425
351.1935739	402.4127781	316.8094993	434.6323488	495.5838897	3.642695067	216.8740456	914.2326301	0.281555487	510.8047576	513.0418999	669.6512373	1.524973277	149.9064665	248.990845	2.255863225	70.46693815	49.58880036	59.60838759	501.4191657	214.3756167	6.597931459	4.15039095	0.225863592	697.1735502	704.7095065	696.070497	0.300641534	438.1611096	2470.473006	660.8448429	16.78831203	19.08671335	3.960819905	51.02670202
351.1772487	402.4090535	316.7976902	434.6244314	495.5762108	3.643572985	216.8624896	914.2367047	0.281546819	510.8012078	513.0277127	670.0488957	1.519027277	150.0625799	248.93629	2.255893882	70.31841996	49.58953704	59.8287287	501.4545285	214.3548384	6.598501803	4.150608595	0.225768364	697.0718041	704.9912777	696.7708663	0.300604239	437.1338691	2468.880821	661.2244698	16.78448746	19.02974102	3.836903472	50.59960969
351.160974	402.4053192	316.7859282	434.616531	495.5685542	3.644445544	216.8509678	914.2407616	0.281538169	510.8325093	513.0430298	670.3706844	1.514594516	150.3571695	248.7285035	2.25592307	70.19498349	49.60019948	60.0505587	501.4533371	214.3419064	6.59873053	4.150793558	0.225710281	697.0975572	705.2625988	697.3886015	0.300566386	435.0905834	2467.474874	661.5168029	16.78128526	18.62655667	3.709947572	50.53870493
351.1447508	402.4015753	316.7742143	434.6086479	495.5609202	3.645312726	216.8394806	914.2448006	0.281529538	510.9151759	513.0950699	670.5558226	1.512744462	150.8674332	248.2816965	2.25594567	70.12643961	49.63169921	60.25207934	501.3979187	214.3399948	6.598365589	4.150926189	0.225700586	697.305856	705.4884742	697.8466484	0.300530628	431.927649	2466.507005	661.655873	16.77906582	18.38693273	3.706349844	50.82096112
351.1285803	402.3978216	316.7625491	434.6007825	495.5533093	3.64617451	216.8280286	914.2488214	0.281520926	511.0472009	513.1823538	670.5990212	1.513600752	151.5935064	247.592508	2.2559618	70.11394206	49.67834257	60.4316637	501.2877793	214.3485213	6.597539135	4.151008992	0.225739082	697.7068185	705.6689401	698.1228122	0.300495268	427.7284142	2466.11327	661.6405304	16.77796384	18.56183295	3.659041875	50.55629541
351.1124634	402.3940582	316.7509335	434.5929351	495.5457217	3.647030876	216.8166126	914.2528237	0.281512332	511.2090285	513.2968261	670.5366148	1.516707014	152.5086863	246.6760721	2.255970354	70.13862403	49.75185396	60.57624183	501.1428751	214.3660406	6.596028765	4.151032474	0.225828985	698.169256	705.7476748	698.2462668	0.300470341	422.8400645	2466.289553	661.5076844	16.77846504	18.56041468	4.016269966	51.24367272
351.0964013	402.3902849	316.7393682	434.5851062	495.538158	3.647881805	216.805233	914.2568072	0.281503758	511.3854923	513.4269946	670.4011383	1.521460202	153.5566047	245.5884008	2.255974219	70.18156382	49.83520536	60.6923577	500.9772778	214.3892064	6.594205752	4.151016557	0.225955659	698.654279	705.7354995	698.2245073	0.300450663	417.5744295	2467.212018	661.3026002	16.78058454	18.57467316	3.752432945	50.95601263
351.0803949	402.3865017	316.7278541	434.5772962	495.5306185	3.648727277	216.7938905	914.2607715	0.281495202	511.5526345	513.5533045	670.2579876	1.526548092	154.6126949	244.464292	2.255982065	70.2053812	49.88274329	60.81128537	500.8125253	214.4111518	6.593052633	4.151014033	0.226084933	699.1506062	705.7064966	698.0859074	0.300418552	412.3424023	2469.107673	661.1171565	16.78389314	18.47403345	4.231881246	51.85861898
351.0644454	402.3827087	316.7163919	434.5695054	495.5231036	3.649567273	216.7825856	914.2647164	0.281486665	511.6924502	513.6632131	670.1364859	1.531526944	155.6395189	243.3333966	2.255993744	70.19502697	49.89149787	60.92414343	500.6659017	214.4286791	6.592666386	4.151031357	0.22620962	699.5716243	705.6297686	697.8341226	0.300376504	407.5977709	2472.172148	660.9890526	16.78871983	18.63442545	3.341321348	50.70816384
351.0485537	402.3789057	316.7049823	434.5617342	495.5156137	3.650401773	216.771319	914.2686415	0.281478147	511.8014525	513.7527328	670.0115218	1.537014348	156.6875242	242.1267177	2.256002194	70.16604217	49.88394484	60.99352869	500.5399476	214.4418901	6.592615417	4.151043803	0.22634223	699.8461868	705.4164081	697.4194346	0.300337123	403.7196986	2476.687632	660.8891394	16.79584827	18.80614305	3.118488239	50.61397064
351.0327209	402.3750926	316.6936263	434.553983	495.5081491	3.651230756	216.7600913	914.2725466	0.281469648	511.8577569	513.8052895	669.9162647	1.542515908	157.7162967	240.8741561	2.256006219	70.10291524	49.85924202	61.00399937	500.4561115	214.4465581	6.592968513	4.151057874	0.226474151	699.8613793	705.0196458	696.8421902	0.300304722	401.327242	2482.927076	660.860253	16.80572739	18.85930458	4.108915161	51.52239566
351.0169481	402.3712696	316.6823246	434.5462523	495.5007103	3.652054204	216.748903	914.2764312	0.281461168	511.8317286	513.800348	669.8995646	1.547328321	158.6767714	239.6097386	2.256003491	69.98348613	49.82477039	60.93217915	500.4448356	214.4377518	6.593633714	4.151074781	0.226598032	699.440692	704.3632119	696.1191329	0.30028909	401.2077679	2491.14653	660.9597371	16.8190017	18.84596527	3.748927227	51.83794705
351.0012364	402.3674364	316.6710779	434.5385423	495.4932976	3.652872096	216.7377548	914.2802951	0.281452706	511.7243797	513.7386864	669.9630234	1.551427267	159.5633881	238.3459925	2.255992879	69.81117604	49.78735615	60.772885	500.5070701	214.4163506	6.594519739	4.151088749	0.22671188	698.5932352	703.4593435	695.2685037	0.300292657	403.416778	2501.199191	661.1857816	16.8353922	18.84989645	3.638055353	51.30666936
350.9855867	402.3635931	316.6598871	434.5308534	495.4859115	3.653684414	216.7266472	914.2841381	0.281444264	511.5570056	513.6362051	670.1011864	1.554682872	160.3499394	237.1467282	2.255979258	69.59311973	49.73620216	60.55904866	500.6252766	214.3867375	6.595894603	4.151108802	0.226804553	697.5010586	702.4509945	694.3523023	0.300303673	407.3376978	2512.450498	661.5259274	16.85332237	18.92630474	3.900659901	51.26238841
350.9700001	402.3597396	316.648753	434.5231861	495.4785523	3.654491136	216.7155809	914.2879597	0.28143584	511.3542827	513.5122585	670.2898338	1.557414162	161.0552619	236.0223272	2.255962733	69.3490427	49.68323901	60.30221611	500.7796584	214.3550876	6.597562765	4.151120007	0.226878562	696.309333	701.4284373	693.421289	0.300321004	412.3908707	2524.239309	661.9392454	16.87156027	18.96517546	3.93757126	51.6756615
350.9544776	402.3558759	316.6376763	434.5155407	495.4712204	3.655292244	216.7045564	914.2917596	0.281427434	511.1626223	513.4023857	670.4635207	1.560646995	161.7541665	234.93617	2.255941235	69.12254589	49.65485679	60.01251685	500.9302047	214.332526	6.599026059	4.15108732	0.22694888	695.2577882	700.5057293	692.5225884	0.30034573	417.5385637	2535.611714	662.3294308	16.88848166	18.85773581	4.339524843	52.23357912
350.9390204	402.352002	316.6266578	434.5079177	495.4639162	3.656087718	216.6935744	914.2955377	0.281419048	511.0057597	513.324602	670.6156655	1.564305262	162.4340829	233.9406559	2.25591692	68.92633759	49.65728515	59.71191968	501.0603312	214.3247657	6.600221701	4.151005526	0.227008828	694.5056243	699.8087288	691.7396558	0.300373185	422.1773686	2545.760031	662.6745672	16.90238002	18.85077183	4.084818175	52.47579791
350.9236295	402.3481177	316.6156983	434.5003174	495.4566401	3.656877538	216.6826354	914.2992934	0.28141068	510.8776754	513.2742734	670.7947484	1.567410964	163.0191867	233.137709	2.255892007	68.74530637	49.69169309	59.41099674	501.183663	214.3312575	6.601215209	4.150884991	0.227038372	694.0481904	699.4032984	691.1701219	0.300402425	426.4313243	2554.216641	663.0214782	16.91212632	18.92778601	3.834821857	52.09637155
350.9083059	402.344223	316.6047987	434.4927401	495.4493925	3.657661685	216.6717401	914.3030266	0.281402332	510.8071142	513.2729898	670.9994398	1.569728878	163.4867435	232.6014594	2.255869385	68.59268642	49.76673948	59.1384263	501.2816365	214.3588982	6.601906681	4.150720533	0.227027405	694.0737789	699.4475614	690.9301418	0.300427912	429.5534235	2559.932051	663.3492487	16.91551127	19.04764207	3.956034058	52.01165621
350.8930506	402.340318	316.5939596	434.4851863	495.4421737	3.658440138	216.660889	914.3067369	0.281394001	510.8317141	513.3488473	671.2296685	1.570887484	163.8001258	232.4358906	2.255854516	68.48243781	49.88535687	58.93971713	501.3288274	214.416221	6.602317555	4.150513022	0.226960494	694.8426206	700.1603052	691.16658	0.300438512	430.5034662	2561.582572	663.6354827	16.90965278	19.22751276	3.995114138	51.90500707
350.8778647	402.3364025	316.583182	434.4776564	495.4349842	3.659212879	216.6500828	914.310424	0.28138569	510.9497553	513.499332	671.4891382	1.570662249	163.9495479	232.654251	2.25584833	68.4162371	50.04734632	58.82325172	501.3259284	214.5015682	6.602449672	4.150270807	0.22683478	696.3324452	701.5307341	691.8864056	0.300433082	429.2474773	2559.10082	663.8823457	16.89442327	19.38052112	3.992806531	52.05042802
350.8627493	402.3324765	316.5724664	434.4701508	495.4278244	3.659979886	216.639322	914.3140876	0.281377398	511.1416635	513.7075659	671.7460491	1.569599346	163.9968725	233.1443929	2.255847421	68.40338409	50.25249045	58.7701694	501.2778063	214.6074419	6.60219888	4.149999778	0.226669379	698.3551885	703.3611689	692.9470664	0.300417393	426.2151981	2553.425577	664.0673671	16.87201011	19.4052347	3.815084592	51.39497982
350.8477055	402.3285399	316.5618139	434.4626697	495.4206945	3.660741141	216.6286073	914.3177273	0.281369124	511.3760493	513.9472255	671.9999743	1.567639535	163.958068	233.8411062	2.255850605	68.43710753	50.49048627	58.76839487	501.2017487	214.7233614	6.601674616	4.149722057	0.226471846	700.6762082	705.4574668	694.2263503	0.300394267	422.0561752	2545.566824	664.2072132	16.84455594	19.52488557	3.927178437	51.36664823
350.8327341	402.3245928	316.5512251	434.4552137	495.4135951	3.661496625	216.6179392	914.321343	0.281360869	511.5888164	514.1663434	672.2718687	1.564449016	163.8378474	234.6495941	2.255855316	68.49261855	50.74163875	58.78682151	501.1393136	214.8303541	6.601126798	4.149475509	0.226250542	702.8517815	707.4803372	695.5221817	0.300370642	418.200607	2537.403143	664.3586671	16.81591122	19.50700961	4.070345911	52.08889212
350.8030134	402.3166667	316.5302419	434.4403783	495.3994892	3.662990196	216.5967453	914.3285006	0.281344415	511.7554037	514.3433067	672.5433132	1.560212633	163.6770778	235.4783016	2.255860524	68.57162367	50.996764	58.81893744	501.0992246	214.9185496	6.600601842	4.149281092	0.226019144	704.6651867	709.2260932	696.6954652	0.300348327	415.0704087	2529.930571	664.5167014	16.78866871	19.39807544	4.031142195	52.04239742
350.7882661	402.3126875	316.5198491	434.4329996	495.3924834	3.663728245	216.5862207	914.332042	0.281336216	511.8940185	514.489465	672.782285	1.555099923	163.5073034	236.3069436	2.255869262	68.69358792	51.25398135	58.89636987	501.0600661	214.9885406	6.600054106	4.149149417	0.225783589	706.1775704	710.7042419	697.7394202	0.300320226	411.9639937	2522.869352	664.6383184	16.76144979	19.37999723	3.809213079	51.53696419
350.7735955	402.3086976	316.5095232	434.4256476	495.3855096	3.664460443	216.5757452	914.3355579	0.281328036	511.9768051	514.5799547	672.9623132	1.549379175	163.3840245	237.0174164	2.255880857	68.86134628	51.50003474	59.01534533	501.0297944	215.0283894	6.599558112	4.149107735	0.225561967	707.1319607	711.6662626	698.4789113	0.300287174	409.2993835	2517.446081	664.7132306	16.73731595	19.27538739	3.930717652	51.08878151
350.7590027	402.3046969	316.499265	434.4183224	495.3785681	3.66518677	216.5653192	914.3390482	0.281319875	511.969092	514.5841813	673.0397773	1.543644635	163.395652	237.4352417	2.255893292	69.08150918	51.72009562	59.16417763	501.0166946	215.023424	6.599158292	4.149184664	0.225382329	707.2005018	711.7808903	698.6712184	0.300251919	407.6318443	2515.325708	664.71857	16.71983004	19.18040328	3.988255531	50.71562181
350.7444888	402.3006854	316.4890753	434.4110246	495.3716594	3.665907207	216.5549436	914.3425125	0.281311732	511.8743795	514.5043741	673.0082532	1.538080471	163.5522839	237.5403845	2.255906753	69.35339027	51.90837345	59.34312507	501.0177833	214.9760899	6.598855332	4.149379591	0.22525025	706.3924125	711.0459063	698.3050607	0.300214799	406.8880314	2516.598188	664.6493235	16.70936405	19.16493152	4.033546113	51.26799183
350.7300548	402.296663	316.4789548	434.4037545	495.3647839	3.666621735	216.5446187	914.3459505	0.281303608	511.7037691	514.3520782	672.9069347	1.532516284	163.7951188	237.4111741	2.255920646	69.65598123	52.06205653	59.53620515	501.0401803	214.8986809	6.598674868	4.149669596	0.225155471	704.854338	709.6327057	697.5012901	0.300180255	407.1733017	2520.72773	664.5448086	16.70507798	19.16221695	4.08857067	50.96761863
350.7157018	402.2926296	316.4689044	434.3965125	495.3579419	3.667330332	216.5343453	914.3493618	0.281295503	511.4893645	514.1550305	672.7541965	1.527067066	164.0852679	237.1253556	2.255935304	69.98142754	52.18282946	59.74070031	501.0735776	214.808497	6.59854156	4.150023004	0.225091138	702.8524036	707.7835394	696.4123028	0.300149901	408.0504927	2526.732386	664.4121712	16.70534381	19.22738591	3.951563683	50.84568435
350.7014308	402.2885852	316.4589248	434.389299	495.3511338	3.66803298	216.5241239	914.3527462	0.281287416	511.3009582	513.972303	672.5789115	1.521783336	164.3468942	236.8583734	2.255952859	70.32558524	52.28156699	59.96862193	501.0896101	214.7371129	6.598279464	4.150382788	0.225038398	700.9445855	705.99633	695.3586837	0.300122407	408.34998	2532.340827	664.2494444	16.70601297	19.22559647	3.987296311	50.94137491
350.6872428	402.2845298	316.4490169	434.3821144	495.34436	3.668729659	216.5139551	914.3561034	0.281279349	511.1599677	513.8240085	672.4043712	1.516888095	164.5442798	236.6626089	2.255972478	70.67134376	52.35384957	60.20310509	501.0866078	214.7008885	6.597873383	4.150716967	0.224994391	699.3352647	704.4663591	694.4548115	0.300102198	407.9603058	2536.987624	664.0780124	16.70639161	19.37245122	3.991884036	50.57734088
350.6731389	402.2804633	316.4391814	434.374959	495.337621	3.66942035	216.5038395	914.359433	0.2812713	511.0436637	513.6931333	672.2222922	1.513020736	164.7170508	236.4266231	2.255991062	71.00141367	52.37999404	60.4100192	501.0793085	214.6986702	6.59742719	4.151024974	0.22497997	697.8604845	703.0396337	693.5652326	0.300096671	407.5614427	2541.917899	663.9132972	16.70947052	19.30799781	3.931502659	50.84761679
350.6591202	402.2763857	316.4294191	434.3678333	495.330917	3.670105031	216.4937778	914.3627347	0.281263269	510.9756691	513.6027926	672.0594038	1.510571148	164.8280062	236.199974	2.256007008	71.29272337	52.35297517	60.56285062	501.0673252	214.7504225	6.596936577	4.151265585	0.224994243	696.7562378	701.9396762	692.8124318	0.300112219	407.1068925	2546.593784	663.7826856	16.71473743	19.20897765	3.986065195	51.01453593
350.6451877	402.272297	316.4197309	434.3607376	495.3242485	3.670783685	216.4837705	914.3660082	0.281255257	510.9820462	513.5797633	671.9600035	1.509881365	164.8157146	236.0630696	2.256018021	71.51205663	52.26531679	60.62430944	501.0550962	214.8808043	6.596416109	4.151386171	0.225031896	696.3127665	701.4568278	692.3642374	0.300157682	406.6696323	2550.309254	663.7325388	16.7214047	19.18728149	3.944697978	50.81448912
350.6313425	402.268197	316.4101174	434.3536724	495.3176158	3.671456291	216.4738182	914.3692532	0.281247264	511.0587506	513.6218041	671.9286395	1.51099514	164.6871773	236.0031505	2.256023334	71.65047032	52.11875558	60.58761051	501.045522	215.0884269	6.595899166	4.151383066	0.225093957	696.5206694	701.5844845	692.2126756	0.300233692	406.3619496	2553.182055	663.770271	16.72971598	19.20028832	3.924887359	51.15528298
350.6175856	402.2640858	316.4005794	434.3466379	495.3110194	3.672122829	216.4639215	914.3724694	0.28123929	511.2029039	513.7242028	671.9541162	1.513352993	164.4630059	236.033245	2.2560252	71.72236697	51.93588056	60.48772716	501.0287449	215.3583249	6.59535563	4.151278066	0.225170315	697.3369169	702.2724882	692.3551506	0.300330669	405.7855993	2554.849622	663.8701204	16.73826999	19.26892739	3.94938815	51.14134396
350.603918	402.2599633	316.3911179	434.3396346	495.3044597	3.67278328	216.454081	914.3756565	0.281231334	511.3860747	513.8619003	672.0220775	1.516508906	164.1863576	236.0998698	2.256024224	71.73461356	51.73139298	60.34353535	501.0089347	215.6674964	6.594846234	4.151105222	0.225259491	698.5348041	703.3124642	692.6791298	0.300442034	405.1045984	2555.858524	664.0186975	16.74749945	19.25324364	3.995989531	50.84932084
350.5903408	402.2558294	316.3817335	434.3326629	495.297937	3.673437624	216.4442974	914.3788141	0.281223397	511.544208	513.9782011	672.091803	1.519862792	163.9564211	236.0513398	2.256021019	71.70489287	51.52133555	60.18398549	500.9983756	215.9709542	6.59450246	4.150938257	0.225368707	699.579327	704.2073193	692.8928161	0.3005577	404.8633351	2557.836843	664.1862806	16.75960575	19.24996036	3.989766957	50.86943948
350.5768551	402.2516842	316.3724271	434.3257231	495.2914517	3.674085841	216.4345712	914.381942	0.281215479	511.6603118	514.0583107	672.1591252	1.522806042	163.7969405	235.8845939	2.256016569	71.63932871	51.32979451	60.03257313	500.9966386	216.2488667	6.594352028	4.150800676	0.225487654	700.3522913	704.8513741	692.9585148	0.300669651	405.0060058	2560.761569	664.3610177	16.77373306	19.33916153	4.011971236	51.3274813
350.5634618	402.2475275	316.3631993	434.3188157	495.2850042	3.674727912	216.4249029	914.3850398	0.281207579	511.7551003	514.123328	672.2615191	1.525019624	163.6591124	235.7104909	2.25601038	71.52019864	51.1775708	59.88426051	501.0006601	216.5093768	6.594376736	4.15065929	0.225596266	701.102567	705.4929923	693.0513732	0.300777227	405.2834755	2563.477935	664.566675	16.78728252	19.40778477	3.97463593	51.06049017
350.5501622	402.2433594	316.3540512	434.311941	495.278595	3.675363817	216.4152933	914.3881073	0.281199698	511.8095423	514.1571718	672.3992325	1.525677581	163.5626607	235.5445931	2.256003582	71.35425635	51.09767676	59.76735221	501.0101887	216.7287839	6.59460486	4.15053938	0.225678142	701.7123464	706.0323455	693.1484958	0.300870535	405.615299	2565.794806	664.7920149	16.79876598	19.53622193	3.967529702	51.00117785
350.5369571	402.2391797	316.3449833	434.3050995	495.2722243	3.675993537	216.4057429	914.3911441	0.281191835	511.8052965	514.1433532	672.5697435	1.523642278	163.5283303	235.423824	2.255998451	71.15669209	51.13473005	59.72698996	501.0202041	216.8774866	6.595038669	4.15047482	0.225709762	702.0623322	706.3664343	693.2419098	0.300935295	405.7142063	2567.232945	665.0146371	16.80574545	19.7228762	4.013518761	51.64701212
350.5238477	402.2349885	316.3359965	434.2982914	495.2658926	3.67661705	216.3962523	914.3941499	0.281183992	511.7448975	514.0850941	672.7754443	1.518855848	163.5463939	235.3689528	2.255995032	70.93084032	51.29221959	59.76528479	501.0297256	216.9547504	6.595688524	4.150460561	0.225686986	702.1847031	706.527868	693.3555597	0.300971042	405.5173496	2567.630424	665.2335532	16.80774481	19.81445741	4.02870599	51.03164424
350.510835	402.2307856	316.3270916	434.2915172	495.2596002	3.677234339	216.3868221	914.3971243	0.281176166	511.6250341	513.9798407	672.9936122	1.512108377	163.6271176	235.3066785	2.255992299	70.68665999	51.53553367	59.86305442	501.043366	216.968362	6.596603457	4.150493586	0.225631261	702.0018656	706.4331771	693.3955165	0.300985611	405.3082141	2567.923374	665.44269	16.8074162	19.85163151	3.977820424	51.40408175
350.49792	402.2265711	316.3182694	434.2847773	495.2533477	3.677845383	216.377453	914.4000672	0.28116836	511.4668798	513.8470262	673.2211263	1.504173051	163.7395319	235.2447099	2.255989362	70.42866235	51.83495275	59.99802916	501.0593257	216.9391001	6.597777725	4.150544045	0.225554155	701.6558734	706.2061346	693.403123	0.300987982	405.0631235	2568.167037	665.6454784	16.80573977	19.80841277	3.967827046	51.54912979
350.4851039	402.2223449	316.3095306	434.2780721	495.2471352	3.678450162	216.3681454	914.4029781	0.281160572	511.3208946	513.7328151	673.469266	1.496514214	163.8078657	235.2304049	2.255984067	70.15113788	52.1370454	60.11914309	501.0738423	216.9145743	6.599173155	4.150540644	0.22547381	701.5245033	706.187038	693.5244277	0.300996638	404.6928813	2568.065236	665.8637863	16.80391289	19.85388685	4.02700206	51.36707082
350.4723876	402.218107	316.3008761	434.2714019	495.2409633	3.679048656	216.3589	914.4058568	0.281152803	511.1971992	513.6462107	673.7210991	1.489814377	163.8161095	235.2446803	2.255976061	69.87066014	52.41141959	60.21337066	501.0862096	216.9074211	6.600796255	4.150470592	0.225403973	701.6381259	706.3942961	693.7384076	0.30101879	404.2370258	2568.00975	666.0886557	16.80341318	19.92639386	3.992986069	51.41209803
350.4597722	402.2138573	316.2923067	434.2647671	495.2348323	3.679640847	216.3497174	914.4087029	0.281145052	511.0763604	513.5690165	673.9489511	1.483614556	163.7849456	235.2696703	2.255967261	69.62140928	52.66826531	60.31325588	501.0944021	216.896263	6.602663818	4.150369313	0.225339839	701.8012591	706.644734	693.953068	0.301047387	403.6190937	2568.319623	666.2860107	16.80186181	19.86974937	3.975227479	51.4860186
350.4472587	402.2095957	316.2838231	434.2581681	495.2287427	3.680226715	216.3405982	914.4115162	0.28113732	510.9694261	513.5104465	674.1279414	1.478677714	163.695536	235.282882	2.255957667	69.42955923	52.87114135	60.40840131	501.0966552	216.8945692	6.604773389	4.150226816	0.225297495	702.0289283	706.9397972	694.133729	0.301090295	402.8538501	2569.479099	666.4393215	16.80325898	19.93370231	3.998671477	51.22487438
350.4348482	402.2053223	316.2754261	434.2516054	495.2226947	3.680806239	216.331543	914.4142962	0.281129607	510.8847727	513.4768005	674.2200777	1.476082376	163.5363121	235.2252792	2.255947106	69.32843182	52.96792703	60.48302571	501.0928017	216.918351	6.607133034	4.15003665	0.225303052	702.2814459	707.2239907	694.1936565	0.301158344	402.0711762	2572.420075	666.526164	16.81058308	19.88932748	3.990423602	51.64977285
350.4225418	402.2010369	316.2671165	434.2450792	495.2166888	3.681379399	216.3225524	914.4170428	0.281121912	510.8222672	513.4666588	674.2198465	1.475889114	163.3174623	235.093907	2.255935867	69.32679547	52.95619224	60.53943768	501.0828275	216.9649626	6.609687039	4.149808868	0.225358586	702.5246401	707.4647509	694.1172317	0.301249917	401.3072854	2577.173756	666.5403443	16.8235461	19.69367457	4.00923063	51.71150665
350.4103405	402.1967396	316.2588951	434.23859	495.2107254	3.681946177	216.313627	914.4197556	0.281114235	510.7944248	513.4900953	674.160784	1.477980118	163.0461783	234.9385286	2.255923103	69.39717046	52.85297784	60.56532944	501.067842	217.0375455	6.612301577	4.149536839	0.225456276	702.8858147	707.7908846	694.006717	0.301361188	400.5958956	2582.946291	666.5091252	16.83976569	19.53053046	3.963636821	51.53013493
350.3982454	402.1924302	316.2507627	434.2321382	495.2048049	3.682506553	216.3047674	914.4224342	0.281106578	510.7930087	513.5377902	674.0612611	1.481818468	162.7605143	234.7762629	2.255909012	69.52512377	52.68727011	60.56919963	501.0503603	217.120861	6.614857118	4.14924583	0.225585828	703.3089798	708.1616406	693.8777487	0.301482227	400.0318998	2589.284634	666.4427898	16.85692186	19.45300355	3.725796293	51.52107518
350.3862574	402.1881088	316.24272	434.225724	495.1989276	3.683060506	216.2959742	914.4250785	0.281098939	510.7907898	513.5828821	673.9510842	1.485964851	162.5331027	234.6368178	2.255894669	69.68774632	52.52700661	60.58331042	501.0342532	217.1761943	6.617204221	4.148991789	0.225720519	703.6230916	708.4412578	693.7343115	0.301591435	399.7052526	2595.399317	666.3521145	16.87067227	19.46653487	3.862478311	51.13742876
350.3743777	402.1837753	316.2347679	434.2193481	495.1930939	3.683608018	216.287248	914.427688	0.281091318	510.7903163	513.6247409	673.8519543	1.490238094	162.3953234	234.5385959	2.255879777	69.86611606	52.38845101	60.60309577	501.0219041	217.1989154	6.619178126	4.148789824	0.225856459	703.838856	708.6478322	693.615956	0.301682371	399.7424961	2600.795216	666.2543286	16.87888189	19.47517721	3.884784392	51.13902279
350.3626072	402.1794297	316.2269072	434.2130106	495.1873043	3.684149068	216.2785893	914.4302624	0.281083716	510.8116745	513.6775986	673.7560175	1.49563876	162.3490081	234.4564855	2.255863531	70.06513253	52.23239856	60.60075766	501.0141057	217.2096988	6.620633964	4.148632362	0.226015693	704.019121	708.8284706	693.5198798	0.30176247	400.3239252	2605.720816	666.1531346	16.88252311	19.5068085	4.306146641	52.05378436
350.3509472	402.1750719	316.2191386	434.206712	495.1815591	3.684683637	216.2699989	914.4328015	0.281076133	510.8594621	513.7414236	673.6884629	1.502064811	162.4342428	234.4040982	2.255845469	70.26061107	52.07343783	60.56718386	501.0140269	217.205661	6.621358504	4.148537566	0.226196961	704.1773758	709.0035853	693.4882686	0.301825014	401.6335727	2609.646529	666.0705559	16.87930424	19.46631209	3.817764091	51.3086749
350.3393985	402.1707018	316.211463	434.2004528	495.1758588	3.685211705	216.2614772	914.4353049	0.281068568	510.9444165	513.8211854	673.6896771	1.509417635	162.6929299	234.4110803	2.255824618	70.41314219	51.93102882	60.4851493	501.0255203	217.1876253	6.621089625	4.148517943	0.226397264	704.3903704	709.2558059	693.6071433	0.301862771	403.8798862	2611.743217	666.0427939	16.86619147	19.51517855	3.930797311	51.63448807
350.3279622	402.1663194	316.203881	434.1942331	495.1702036	3.685733252	216.2530249	914.4377723	0.281061022	511.0679545	513.9173036	673.7574627	1.517675864	163.1120732	234.4720946	2.25580141	70.52007587	51.80459762	60.35114984	501.0480199	217.1604215	6.619814569	4.14857391	0.226612806	704.6692694	709.593737	693.8797572	0.301877003	407.0401841	2611.963561	666.0692548	16.84400433	19.56748624	4.696553695	51.81297973
350.3166395	402.1619248	316.1963936	434.1880536	495.164594	3.686248258	216.2446426	914.4402034	0.281053494	511.2097371	514.0151058	673.8688889	1.526039035	163.6434575	234.5775523	2.255778045	70.59687036	51.71366663	60.19135892	501.0776851	217.1154173	6.617757575	4.148709391	0.226819889	704.926385	709.9349469	694.2589766	0.301867717	410.8195262	2610.49747	666.1231428	16.81525197	19.71464164	4.358560013	52.21814593
350.3054313	402.1575177	316.1890015	434.1819145	495.1590304	3.686756705	216.2363309	914.4425979	0.281045985	511.3648445	514.1133178	673.9960904	1.534363866	164.2169247	234.7092285	2.255756072	70.66069065	51.65033592	60.01261816	501.1098009	217.0622656	6.615134462	4.148907522	0.227006824	705.1665547	710.2745243	694.7139207	0.301843003	414.9398925	2607.702192	666.1807327	16.78371734	19.63058135	3.960070528	51.45943387
350.2943387	402.1530983	316.1817054	434.1758162	495.1535131	3.687258572	216.2280903	914.4449555	0.281038494	511.5323668	514.2165896	674.0815899	1.542956321	164.7117511	234.823366	2.255737514	70.75278755	51.57733133	59.81844292	501.1361545	217.0248259	6.612319616	4.149129486	0.227168317	705.416783	710.6147516	695.1747414	0.301821505	418.9761586	2604.518107	666.1971126	16.75632676	19.47138572	3.741834368	51.20284879
350.2833627	402.1486664	316.1745062	434.1697591	495.1480426	3.68775384	216.2199215	914.4472759	0.281031022	511.6994691	514.3171072	674.1044705	1.551228312	165.0586358	234.9063815	2.255724304	70.88019981	51.50511155	59.62315614	501.1523079	217.006289	6.609558324	4.149364295	0.227282061	705.6597372	710.9349232	695.6164218	0.301808047	422.6070665	2601.129722	666.1519338	16.73650909	19.33061948	3.763212198	51.11609965
350.2725045	402.1442219	316.1674047	434.1637436	495.1426193	3.688242488	216.2118251	914.4495587	0.281023568	511.8555772	514.4052987	674.0869287	1.558249657	165.2468701	234.9725702	2.255717332	71.00890193	51.47385387	59.4329104	501.1586682	217.0011032	6.606865953	4.149620415	0.227321266	705.9047913	711.253934	696.0838481	0.301796983	425.7353658	2596.934827	666.0611503	16.72406348	19.34070583	3.676131059	50.75746982
350.2617649	402.139765	316.1604017	434.1577701	495.1372435	3.688724497	216.2038017	914.4518036	0.281016133	511.9838461	514.471001	674.007829	1.563198474	165.1902014	235.0073364	2.255718891	71.14114789	51.50116792	59.26521088	501.1499912	217.0128333	6.60455998	4.149882392	0.227256014	706.1404232	711.5568554	696.5551265	0.301793926	427.9549855	2592.09538	665.9038271	16.7231726	19.43615775	3.870411831	51.00264524
350.2511452	402.1352954	316.1534978	434.151839	495.1319156	3.689199848	216.1958518	914.4540104	0.281008717	512.057599	514.4973397	673.8395621	1.564852398	164.7838574	234.9947625	2.255732044	71.28256858	51.61613424	59.1497186	501.1196403	217.0398688	6.603071506	4.150134623	0.227045608	706.321463	711.7984262	696.9928846	0.301804053	428.729515	2586.831111	665.6501787	16.73888833	19.63595798	3.979810018	51.07631057
350.2406463	402.1308132	316.146694	434.1459506	495.126636	3.689668521	216.1879762	914.4561787	0.281001319	512.0723832	514.4822518	673.5893213	1.563049428	164.0409102	234.9371274	2.255756645	71.42465917	51.82077267	59.09187469	501.0680702	217.080498	6.602431741	4.150370949	0.226694441	706.4444546	711.9749975	697.3967625	0.301826895	428.0186863	2581.129143	665.3081752	16.7706646	19.68396241	4.24959718	51.55750887
350.2302693	402.1263184	316.139991	434.1401054	495.1214051	3.690130496	216.1801752	914.4583081	0.280993939	512.0435778	514.4394185	673.2688964	1.558910006	163.0515644	234.8355029	2.255790047	71.57359751	52.06921624	59.07978695	500.9993908	217.1386055	6.602446335	4.15057967	0.226255619	706.5275215	712.0953172	697.7528768	0.301863772	426.1107267	2575.314182	664.898151	16.81483159	19.68192189	4.193008131	51.76808513
350.2200152	402.1218108	316.1333896	434.1343037	495.1162233	3.690585753	216.1724497	914.4603985	0.280986579	511.9800038	514.3759998	672.9104156	1.553082629	161.9341905	234.7062369	2.25582947	71.71590951	52.34052035	59.10710983	500.9198244	217.2073657	6.602860889	4.15076209	0.225774079	706.5680161	712.1582832	698.0714329	0.301908924	423.3474721	2569.32235	664.4548302	16.8658582	19.66126876	3.847377254	51.43767265
350.2098852	402.1172904	316.1268906	434.1285459	495.111091	3.691034272	216.1648001	914.4624495	0.280979236	511.900291	514.3042708	672.5806298	1.546601577	160.9020212	234.5868119	2.255869995	71.81772097	52.61190135	59.15607572	500.8415089	217.2725323	6.603125422	4.15093449	0.225318959	706.5723428	712.1789992	698.3992472	0.301948326	420.4260297	2562.707916	664.0455837	16.91314095	19.6773005	3.797631431	51.44170922
350.1998801	402.1127572	316.1204948	434.1228324	495.1060085	3.691476035	216.1572271	914.4644607	0.280971912	511.8128331	514.2333106	672.3040192	1.540290294	160.0696919	234.488399	2.25590862	71.87468996	52.84997367	59.22317067	500.7698983	217.3291908	6.603062214	4.151086209	0.2249438	706.5387255	712.1524366	698.7280742	0.301979463	417.6361162	2555.677179	663.7003232	16.9512062	19.72681757	3.826485868	51.83507166
350.1900012	402.1082112	316.114203	434.1171636	495.1009763	3.691911021	216.1497312	914.4664319	0.280964607	511.7054024	514.1603549	672.0682973	1.534069196	159.4311663	234.4017542	2.255945226	71.89866287	53.03914427	59.32803367	500.7030047	217.3758738	6.602939085	4.151186016	0.224663701	706.4427417	712.0464297	699.009306	0.302008195	414.7426839	2548.81213	663.4117976	16.98058335	19.94113212	4.212486598	52.58285008
350.1802494	402.1036522	316.1080159	434.1115398	495.0959947	3.69233921	216.1423131	914.4683628	0.28095732	511.5869111	514.0962768	671.9019271	1.528950831	159.1271525	234.3409485	2.255976036	71.88708668	53.13739398	59.46885342	500.6473672	217.405184	6.602571312	4.151217843	0.224545739	706.2778091	711.8503869	699.2274517	0.302031776	412.0824716	2542.438112	663.2150179	16.99449051	20.21486469	3.986836933	52.254273
350.1706258	402.0990803	316.1019344	434.1059615	495.0910642	3.692760583	216.1349734	914.4702529	0.280950051	511.4733611	514.0583082	671.8356832	1.526482837	159.3346676	234.3204633	2.255996084	71.84426909	53.08166248	59.63872471	500.6111274	217.4108276	6.601699842	4.15116063	0.224679799	706.0430132	711.5555147	699.3579194	0.302048269	410.1197064	2537.067309	663.1506237	16.98458005	20.27858249	3.929809923	51.89403318
350.1611314	402.0944954	316.0959591	434.1004291	495.0861851	3.693175121	216.1277126	914.4721021	0.280942801	511.3651115	514.0466005	671.8684947	1.526763071	160.0474047	234.339601	2.256004992	71.77346795	52.86979092	59.83277669	500.5951931	217.3926908	6.600374091	4.151011613	0.225065915	705.7401302	711.1642927	699.3918817	0.302058454	408.8669276	2532.909527	663.2176172	16.95122852	20.25138607	4.041242662	51.86888962
350.1517673	402.0898975	316.0900911	434.0949429	495.0813578	3.693582803	216.1205314	914.47391	0.28093557	511.2622724	514.0530909	671.9933817	1.529126739	161.1623924	234.3971744	2.256004819	71.66650229	52.54684267	60.03057282	500.5987078	217.3543429	6.598631188	4.150801283	0.225642309	705.3901608	710.7103187	699.3642734	0.302059872	408.2716156	2529.627508	663.3995487	16.89915248	20.31032505	3.860925372	51.38548957
350.1425345	402.0852865	316.0843309	434.0895032	495.0765827	3.693983609	216.1134303	914.4756763	0.280928356	511.1595901	514.0680918	672.1814519	1.532804235	162.5247373	234.4790699	2.25599856	71.53101337	52.15270319	60.21883547	500.617425	217.3037891	6.596709256	4.150545741	0.226338783	705.0105273	710.2177307	699.2813909	0.302056019	408.0702579	2527.238706	663.6602881	16.8358552	20.3274172	3.853626141	51.32586255
350.1334342	402.0806623	316.0786794	434.0841106	495.0718602	3.694377521	216.10641	914.4774007	0.280921162	511.0390432	514.0702786	672.3691061	1.536049706	163.8279135	234.5529164	2.255992762	71.38430844	51.76257324	60.38920946	500.6402875	217.2563556	6.595165516	4.150264161	0.227021948	704.6199947	709.7135695	699.1421967	0.302056012	407.5807285	2525.787586	663.9242259	16.77584684	20.18381787	3.901739457	51.12486081
350.1244672	402.076025	316.0731375	434.0787654	495.0671906	3.694764518	216.0994711	914.4790829	0.280913986	510.902571	514.0531641	672.5359353	1.53837397	164.9411585	234.6114765	2.255989605	71.23264905	51.41486284	60.51743843	500.6654866	217.2183154	6.594112298	4.149983401	0.227626367	704.2423533	709.2320957	698.9655591	0.30206042	406.7150221	2525.210416	664.1620971	16.72483767	20.05155201	3.765247089	50.93873416
350.1156348	402.0713745	316.0677058	434.0734679	495.0625745	3.69514458	216.0926141	914.4807225	0.280906828	510.7701704	514.0278327	672.6996136	1.540818265	165.9313986	234.6685548	2.255986219	71.08150176	51.09014867	60.57241396	500.7000302	217.186707	6.59329372	4.149719281	0.22817704	703.896757	708.7983227	698.762129	0.302064613	405.9323276	2525.685904	664.3904946	16.67930833	19.99396589	4.173142838	51.4030713
350.1069379	402.0667107	316.0623851	434.0682186	495.058012	3.695517689	216.0858396	914.4823192	0.280899689	510.6476168	513.9882162	672.8351992	1.542939396	166.6443356	234.7166402	2.255985027	70.94154938	50.83256382	60.52041487	500.7422451	217.1691835	6.592803133	4.149508291	0.228596021	703.6144882	708.4569088	698.5569035	0.302068772	405.1858302	2527.136266	664.5732972	16.64588168	19.86274365	3.892327439	51.24632823
350.0983775	402.0620336	316.0571764	434.0630178	495.0535038	3.695883823	216.0791483	914.4838728	0.280892568	510.5427874	513.92587	672.9146236	1.54407421	166.8853483	234.7485424	2.255989328	70.82119965	50.70463113	60.3176944	500.7901036	217.1750757	6.592709004	4.149403326	0.228779544	703.4367323	708.2679836	698.3935624	0.302071522	404.4385418	2529.278305	664.6669063	16.6327709	19.6333793	3.816789332	50.81484572
350.0899548	402.0573431	316.0520802	434.0578659	495.04905	3.696242965	216.0725407	914.485383	0.280885465	510.4609234	513.8432396	672.9380548	1.544354372	166.6517029	234.7653749	2.255998613	70.72250818	50.7082981	59.96518699	500.8435136	217.2039277	6.592956383	4.149411391	0.228725654	703.370647	708.2394948	698.2791897	0.302071386	403.7577986	2532.053458	664.6708759	16.63995389	19.37676925	3.754891034	50.9400368
350.0816708	402.0526393	316.0470975	434.0527634	495.0446512	3.696595093	216.0660175	914.4868493	0.280878381	510.3922639	513.741213	672.9062194	1.543606793	165.9888679	234.7614923	2.256012219	70.6419142	50.82737076	59.51351883	500.8978546	217.2522251	6.593621383	4.149503057	0.228468037	703.3935276	708.3348507	698.1920235	0.302070304	402.9273737	2535.425508	664.5944356	16.66583366	19.26358754	3.982143377	51.31539131
350.0735266	402.047922	316.0422291	434.0477105	495.0403077	3.696940188	216.0595792	914.4882716	0.280871316	510.3382175	513.6288107	672.8416447	1.542340132	165.0335792	234.7444701	2.256027182	70.57135706	51.02625256	59.00508463	500.9532514	217.3116535	6.594538968	4.149654068	0.228075651	703.4851254	708.5211285	698.1209717	0.302065614	402.0498261	2539.295261	664.4701216	16.70455902	19.12377895	3.864077413	51.16269257
350.0655231	402.0431912	316.0374756	434.0427077	495.0360198	3.697278231	216.0532265	914.4896494	0.280864269	510.3050867	513.526866	672.7991796	1.541973444	164.1035373	234.7356733	2.256036687	70.4949436	51.21906653	58.50654769	501.0139942	217.3644622	6.59531305	4.149813994	0.227704692	703.6043376	708.7337231	698.0389405	0.302051572	401.4897272	2543.648802	664.3732733	16.74206802	18.98180895	3.950282097	51.29614389
350.0576614	402.0384469	316.0328379	434.0377554	495.0317881	3.697609201	216.0469599	914.4909825	0.28085724	510.2903292	513.4403559	672.7880711	1.542582697	163.2775289	234.7356736	2.256039277	70.40659171	51.38648608	58.06786827	501.0766017	217.4053161	6.595859071	4.149963234	0.227398451	703.7322564	708.9409091	697.9394556	0.302026821	401.1839099	2548.234262	664.321339	16.77499723	18.86015668	3.85591904	51.19305377
350.0499426	402.033689	316.0283168	434.032854	495.0276128	3.69793308	216.04078	914.4922706	0.28085023	510.2928237	513.3619951	672.7790719	1.543272929	162.4071261	234.7315837	2.256038115	70.3111616	51.57622711	57.69885317	501.1333256	217.4409332	6.596264783	4.150129968	0.227084945	703.8854442	709.163546	697.8521291	0.301991402	400.8710963	2552.533228	664.2777569	16.81011541	18.89031775	3.928128363	51.83088244
350.0423678	402.0289175	316.0239131	434.0280038	495.0234944	3.698249847	216.0346875	914.4935133	0.280843238	510.308816	513.2967523	672.7803342	1.543999601	161.5737847	234.7227523	2.256031961	70.20085939	51.77032948	57.4623559	501.1788404	217.4657451	6.596426	4.150293833	0.226809012	704.0412025	709.3635382	697.7739958	0.301943589	400.4363274	2556.127618	664.2598898	16.84401477	18.91748081	4.028528451	51.80255014
350.0349379	402.0241323	316.0196276	434.0232052	495.0194333	3.698559482	216.0286829	914.4947104	0.280836265	510.3284277	513.2486262	672.7985972	1.54452184	160.8713814	234.7050331	2.256019761	70.06532224	51.94658934	57.44413145	501.2052023	217.4733539	6.596284161	4.150421892	0.226626074	704.1650844	709.4849144	697.6938699	0.30188284	399.6296088	2558.527434	664.2870937	16.87285099	18.88238381	3.917493725	51.62537349
350.0276541	402.0193335	316.015461	434.0184586	495.0154298	3.698861967	216.0227669	914.4958615	0.280829309	510.3497986	513.2166266	672.8289808	1.544670852	160.2996105	234.6775313	2.25600239	69.90927505	52.10684491	57.64863761	501.2104229	217.4643817	6.595843364	4.150512165	0.226531698	704.2535869	709.5240292	697.6179762	0.301810318	398.409781	2559.578046	664.3537035	16.89662101	18.97234035	3.935128604	52.08874278
350.0205173	402.0145208	316.0114142	434.0137644	495.0114843	3.69915728	216.01694	914.4969663	0.280822373	510.3772882	513.2032846	672.8822865	1.545014848	159.928502	234.6520625	2.255979471	69.7447175	52.22862085	58.02904763	501.2012769	217.4378694	6.595050582	4.150558205	0.226544718	704.3072981	709.4901146	697.5439835	0.301728119	397.0741073	2559.634446	664.4675876	16.91177126	19.02315538	4.028025497	52.19656085
350.0135287	402.0096944	316.0074879	434.009123	495.0075973	3.699445404	216.0112028	914.4980246	0.280815454	510.4105449	513.2027742	672.9450551	1.545402365	159.7037799	234.6295417	2.255953556	69.58905188	52.32433214	58.53009032	501.1802667	217.3995481	6.594009566	4.150569926	0.226624589	704.3379187	709.4090241	697.4815352	0.301640692	395.6933201	2558.896771	664.6058635	16.92054174	19.03648948	3.965910653	51.78178347
350.0066892	402.0048542	316.0036829	434.0045347	495.003769	3.699726317	216.0055559	914.4990359	0.280808555	510.451005	513.2007078	672.9810537	1.545276223	159.4331134	234.6059452	2.255930274	69.47289465	52.44310286	59.03893352	501.1510776	217.3638705	6.592970788	4.150586324	0.226655671	704.3834969	709.3499883	697.457578	0.301555266	394.3249661	2557.70404	664.7103423	16.93134337	19.18276191	3.874183162	51.56059045
350	402	316	434	495	3.7	216	914.5	0.280801673	510.4960872	513.1941019	672.9888764	1.544722107	159.1412778	234.5871651	2.255911226	69.41098064	52.57524966	59.50988785	501.1175131	217.3331678	6.591983678	4.150600308	0.226633833	704.4411306	709.3195048	697.4722918	0.301476571	393.0959269	2556.294232	664.7746152	16.9428648	19.13398145	4.042372636	52.07165953
349.9933976	401.9951293	315.996431	433.9955057	494.9962637	3.700266854	215.994566	914.5009043	0.28079481	510.5350344	513.1870168	672.9870581	1.543911346	158.9980564	234.5800356	2.255895533	69.40099853	52.67458092	59.9826244	501.0783709	217.3006485	6.590972213	4.150566473	0.226636054	704.469139	709.2618383	697.5072367	0.301407232	391.984811	2554.531828	664.8277558	16.94750061	18.99676793	3.967419769	51.98885382
349.9868177	401.9902393	315.9929668	433.9910385	494.9925335	3.70052731	215.9892842	914.5017368	0.280787965	510.562104	513.1755745	672.9764703	1.542937514	159.0525514	234.5921429	2.255885113	69.45916965	52.72373871	60.40543269	501.0383541	217.2685487	6.590004	4.150469424	0.226666599	704.4577288	709.1768053	697.5579451	0.301353578	391.125486	2552.721186	664.8660215	16.94279696	19.01225493	3.885806688	51.6653385
349.9802603	401.9853302	315.989607	433.9865981	494.9888093	3.700781397	215.984154	914.5024977	0.280781139	510.5722191	513.1570038	672.9655331	1.54217441	159.3949563	234.6365844	2.25588147	69.60440356	52.69191461	60.70737139	501.0057051	217.2381917	6.589130102	4.150287325	0.226744504	704.3944939	709.0642858	697.6140818	0.301322905	390.7764183	2551.376631	664.8930648	16.92432868	19.09196027	3.955119431	51.89416509
349.9737252	401.9804019	315.986351	433.9821846	494.9850911	3.701029144	215.9791745	914.5031874	0.28077433	510.5643237	513.1329826	672.9586735	1.541596447	160.0415993	234.7128396	2.25588456	69.83426188	52.57003313	60.88518192	500.981458	217.2084675	6.588373098	4.150014455	0.226878707	704.2740199	708.9167788	697.6685866	0.301316193	390.955249	2550.555445	664.9143439	16.89150475	19.08167679	4.020870353	52.35970649
349.9672125	401.9754547	315.9831985	433.9777976	494.9813791	3.701270579	215.9743453	914.5038061	0.280767541	510.5471726	513.1047408	672.9429601	1.540730677	160.8330253	234.8062084	2.255894507	70.13661374	52.39568903	60.94058256	500.9633998	217.1822506	6.587820952	4.149688054	0.227011189	704.1253514	708.7636351	697.7295292	0.301329696	391.5515195	2550.152965	664.9127367	16.85190216	19.00170118	3.934379049	51.65471914
349.9607219	401.9704885	315.9801489	433.9734372	494.9776731	3.70150573	215.9696656	914.5043543	0.280760769	510.5267737	513.0792873	672.9241328	1.539416828	161.7238937	234.9069307	2.255909373	70.49015729	52.17522759	60.91025592	500.9494641	217.1560743	6.587464018	4.149320358	0.22714279	703.9551188	708.6001293	697.7898139	0.301358518	392.4833761	2550.018967	664.8988213	16.80794942	18.89659345	3.895902709	51.62748776
349.9542535	401.9655034	315.9772018	433.9691032	494.9739731	3.701734627	215.9651347	914.5048322	0.280754016	510.51058	513.0703888	672.9175622	1.53746004	162.6931824	234.99986	2.255924829	70.85398459	51.90927152	60.89552027	500.933255	217.1208351	6.587208125	4.148919018	0.227304974	703.7612308	708.3964513	697.835093	0.30139279	393.5432579	2549.690056	664.9021488	16.76123869	18.81190543	4.03969481	51.35226215
349.947807	401.9604995	315.9743568	433.9647956	494.9702792	3.701957297	215.960752	914.5052401	0.280747282	510.5067574	513.0830491	672.9241867	1.534627523	163.6393573	235.0730815	2.255939557	71.20799064	51.61579316	60.90497074	500.9148861	217.0758469	6.58711461	4.148508662	0.227471959	703.5630145	708.1669618	697.8587262	0.301428238	394.6791613	2549.204197	664.9240822	16.71657199	18.74732436	4.000875708	51.61048011
349.9413825	401.9554769	315.9716133	433.9605141	494.9665915	3.70217377	215.9565169	914.5055784	0.280740565	510.5189683	513.1156144	672.9441134	1.530932846	164.4923382	235.1253603	2.255954488	71.55356346	51.29998888	60.86472276	500.902343	217.0250177	6.587342056	4.148104217	0.227608773	703.3789384	707.9427949	697.8500033	0.301467793	396.0536758	2549.152199	664.9567275	16.67689491	18.64128773	3.898214035	51.48665865
349.9349798	401.9504355	315.9689708	433.9562586	494.9629097	3.702384073	215.9524287	914.5058475	0.280733867	510.558028	513.1740318	672.9796266	1.526145417	165.1201211	235.1424083	2.255967856	71.86519428	50.98452269	60.77630282	500.8971333	216.9678555	6.587981114	4.147737967	0.227680959	703.2359615	707.746487	697.7982546	0.301506184	397.6303403	2549.690109	665.002205	16.64822222	18.41624188	3.933235486	51.80698605
349.9285987	401.9453756	315.9664291	433.9520292	494.9592341	3.702588235	215.9484867	914.5060475	0.280727187	510.6394442	513.2642801	673.0270658	1.519877932	165.3126756	235.1039376	2.255977823	72.11208522	50.7111904	60.63761117	500.9003923	216.9055801	6.589162687	4.147461261	0.227625003	703.1772825	707.6184873	697.6965576	0.301536149	399.3379984	2550.98313	665.0542382	16.64001066	18.14222711	3.865065211	51.6680516
349.9222394	401.9402971	315.9639874	433.9478255	494.9555646	3.702786285	215.9446902	914.5061789	0.280720526	510.7627475	513.384545	673.0867057	1.512263692	165.0537506	235.011197	2.255984286	72.28700227	50.49023341	60.44231804	500.9130129	216.8394671	6.590890841	4.14728586	0.227434134	703.2053677	707.565533	697.5478518	0.301557159	401.1621869	2553.071607	665.1114386	16.65283082	18.01778716	3.966804305	51.70870479
349.9159015	401.9352001	315.9616455	433.9436476	494.9519011	3.702978251	215.9410387	914.5062419	0.280713883	510.9149724	513.5297559	673.1630379	1.50379555	164.4934551	234.879314	2.255987215	72.39004023	50.31165185	60.23877339	500.9300252	216.7677613	6.59297217	4.147193021	0.22716302	703.2837893	707.5503952	697.3686206	0.301570002	402.9884148	2555.477175	665.183387	16.67988301	17.97319052	4.049760339	52.34106015
349.9095851	401.9300846	315.9594028	433.9394952	494.9482438	3.703164161	215.9375314	914.5062369	0.280707258	511.0834666	513.6901058	673.2535646	1.494975378	163.7395553	234.7253586	2.255988054	72.43114287	50.17502486	60.02624992	500.950112	216.6931444	6.595295733	4.147173531	0.226836743	703.3876082	707.5595622	697.1787668	0.301578282	404.7842503	2558.005572	665.2655066	16.71607213	18.22684734	3.941940437	52.35986458
349.9032901	401.9249509	315.9572588	433.9353683	494.9445925	3.703344045	215.9341676	914.5061643	0.280700651	511.2454746	513.8475973	673.3530809	1.486629975	162.9950857	234.58128	2.255990356	72.44195831	50.06685657	59.77126887	500.9738244	216.6212785	6.597720438	4.14719932	0.226496795	703.4732361	707.5731824	697.0077117	0.301591678	406.5984785	2560.54302	665.3464707	16.751613	18.33749101	3.98838193	52.07419236
349.8970163	401.9197988	315.9552131	433.9312668	494.9409473	3.70351793	215.9309468	914.5060242	0.280694063	511.3892469	513.9933543	673.4601224	1.479334468	162.3657192	234.4633073	2.255994579	72.42355886	49.99425779	59.50131799	500.9974392	216.5536746	6.600078364	4.147267398	0.226173845	703.5156893	707.5740768	696.8795604	0.301610925	408.3281775	2562.716907	665.4253115	16.78133944	18.47527813	4.070599914	52.57935645
349.8907636	401.9146285	315.9532653	433.9271905	494.9373083	3.703685845	215.9278682	914.5058172	0.280687493	511.5193203	514.1273483	673.5730688	1.473276334	161.7771757	234.3670077	2.255998531	72.34663955	49.99643191	59.26505182	501.0167362	216.4904476	6.602284534	4.147415715	0.225852536	703.5286074	707.5741271	696.8084509	0.301628227	409.7904408	2564.214833	665.5022884	16.8085259	18.5557133	3.985782393	52.58763284
349.8845321	401.9094401	315.9514148	433.9231394	494.9336754	3.703847819	215.9249313	914.5055433	0.280680942	511.6224737	514.2385992	673.6887131	1.469173537	161.3462832	234.3116298	2.256002521	72.21088997	50.08781497	59.1024667	501.0263949	216.4336035	6.604119265	4.147645295	0.225566444	703.4848545	707.5556995	696.8268734	0.301643379	410.8401565	2564.535708	665.5748509	16.82735698	18.91527689	4.029428739	52.60674975
349.8783215	401.9042336	315.9496613	433.9191132	494.9300485	3.70400388	215.9221352	914.5052031	0.280674408	511.6807385	514.3143082	673.804643	1.467928591	161.2515628	234.3222995	2.256006741	72.01738106	50.27932861	59.08005611	501.0181896	216.3841709	6.605268662	4.147948673	0.225371982	703.3430718	707.485471	696.97577	0.301656002	411.2753373	2562.930187	665.6438762	16.82910514	18.73015789	4.605787909	52.19608409
349.8721318	401.8990091	315.9480041	433.9151119	494.9264278	3.704154056	215.9194795	914.5047969	0.280667893	511.6945177	514.3548647	673.9165631	1.46962985	161.4853364	234.3961678	2.256010306	71.77058777	50.56954052	59.20721476	500.9916289	216.3430312	6.605687603	4.148323609	0.22527356	703.1086918	707.3680187	697.2528215	0.301664182	411.0765618	2559.373264	665.7065991	16.81420128	18.93884468	4.098772467	51.85088212
349.8659628	401.8937666	315.946443	433.9111354	494.9228132	3.704298377	215.9169633	914.5043248	0.280661396	511.6708533	514.3675662	674.0178446	1.473833685	161.985054	234.5170998	2.256013097	71.50144263	50.92076584	59.4231248	500.9540858	216.3119119	6.605532324	4.148742391	0.225257978	702.8062408	707.224626	697.619652	0.301670452	410.4622759	2554.506815	665.7554665	16.78605881	18.8015722	3.996858106	51.59683525
349.8598146	401.8885062	315.9449773	433.9071836	494.9192048	3.70443687	215.9145861	914.5037873	0.280654918	511.6229283	514.3645113	674.1031222	1.479976122	162.6347057	234.6604986	2.256013281	71.22578388	51.3064983	59.6993814	500.9106458	216.2905003	6.604939948	4.149190645	0.225305796	702.4713866	707.0794931	698.0353392	0.301672411	409.5733003	2548.837982	665.7876651	16.75073239	18.62059056	4.105573916	51.82932479
349.853687	401.883228	315.9436066	433.9032563	494.9156025	3.704569565	215.9123472	914.5031847	0.280648457	511.5794311	514.3695157	674.1670031	1.48688941	163.1692076	234.7785118	2.256007255	70.95258879	51.69761921	59.9917852	500.8699225	216.2769107	6.60420742	4.14966415	0.225362078	702.1759382	706.9816095	698.4288897	0.301663687	408.6214044	2543.253159	665.8016646	16.72144983	18.4970819	3.933138973	51.72865055
349.8475799	401.8779321	315.9423306	433.8993533	494.9120063	3.704696489	215.9102459	914.5025174	0.280642015	511.5499992	514.3930093	674.2007702	1.494068338	163.5181572	234.8500715	2.255993811	70.71448396	52.05321363	60.26423307	500.8371817	216.2716117	6.603444481	4.150130935	0.225420155	701.9488381	706.9501996	698.7592703	0.301644172	407.7901003	2538.269794	665.7912754	16.70198455	18.36412654	3.922959598	51.57555375
349.8414931	401.8726185	315.9411486	433.8954747	494.9084162	3.704817671	215.9082816	914.5017855	0.280635592	511.5247148	514.4308209	674.1935578	1.501848472	163.8085029	234.8833631	2.255973218	70.55170759	52.3397947	60.52884987	500.8102906	216.276431	6.60248371	4.150546742	0.225526166	701.7725855	706.9693788	699.0295698	0.301616419	407.1094315	2533.714782	665.7489824	16.68661376	18.16668708	3.993437907	51.67957624
349.8354267	401.8672873	315.9400603	433.8916203	494.9048323	3.70493314	215.9064536	914.5009895	0.280629186	511.5143917	514.4956764	674.1337964	1.509604371	163.9737869	234.8536458	2.255944173	70.51002358	52.50150233	60.74424229	500.7951192	216.2916737	6.601442554	4.150865033	0.225678236	701.6792532	707.0584931	699.1901792	0.301580921	406.8118111	2530.181451	665.666911	16.67912938	18.09609609	3.922147803	51.32715616
349.8293806	401.8619385	315.9390651	433.8877899	494.9012545	3.705042923	215.9047613	914.5001297	0.280622799	511.532243	514.603442	674.0077412	1.516481654	163.9346985	234.7305116	2.255905677	70.65099367	52.46272009	60.84192203	500.8004927	216.3179197	6.600509262	4.151023101	0.225871451	701.7079243	707.2420344	699.1757331	0.301540205	407.2349452	2528.522565	665.5345999	16.68410325	18.35011659	3.921890506	51.85234001
349.8233545	401.8565722	315.9381627	433.8839835	494.8976829	3.705147051	215.9032039	914.4992064	0.28061643	511.5767866	514.7522955	673.8147273	1.522368045	163.7095133	234.5166627	2.255859	70.98646071	52.21622876	60.82198145	500.8261104	216.3550087	6.599702894	4.151011903	0.226107802	701.855167	707.5119886	698.9836618	0.301495345	408.4243933	2528.723322	665.3518135	16.70068194	18.50367548	3.946622792	51.94003808
349.8173485	401.8511885	315.9373524	433.8802009	494.8941174	3.70524555	215.9017809	914.4982199	0.280610079	511.6458423	514.9331941	673.5689381	1.527259522	163.2743855	234.2271225	2.255806814	71.47442373	51.81647071	60.71710577	500.8679314	216.4009389	6.59908018	4.150883494	0.226358088	702.1078256	707.8519164	698.6418692	0.301444372	410.2530968	2530.404305	665.1296709	16.72930982	18.73237671	3.965899266	52.37962656
349.8113625	401.8457875	315.936634	433.876442	494.8905581	3.70533845	215.9004915	914.4971705	0.280603746	511.7272374	515.1300685	673.2826738	1.531473681	162.7098036	233.8911321	2.255753193	72.08668429	51.31082825	60.56515582	500.9199488	216.4547958	6.598601093	4.150674145	0.226618573	702.4297652	708.2285373	698.1941033	0.301388739	412.5828514	2532.979473	664.8768051	16.76547496	19.00861784	4.056174681	52.31611389
349.8053963	401.8403692	315.9360069	433.8727067	494.8870049	3.705425779	215.8993351	914.4960586	0.280597432	511.7931012	515.3109511	672.9757002	1.536003509	162.2226699	233.5682649	2.255704615	72.77115266	50.7868797	60.4495476	500.969223	216.5159296	6.598061956	4.150445619	0.226904729	702.7431993	708.5775399	697.7344622	0.301331233	415.0828312	2535.186462	664.606836	16.79795985	19.17910847	4.172046332	53.09487074
349.7994499	401.8349337	315.9354706	433.8689949	494.8834579	3.705507566	215.8983111	914.4948845	0.280591136	511.8365565	515.4632635	672.6634967	1.540819883	161.8433903	233.2816457	2.255665615	73.49666288	50.2909622	60.39614272	501.0113551	216.5821168	6.597529123	4.150238456	0.227195183	703.0212555	708.8689513	697.2955576	0.30127332	417.6699687	2536.595027	664.3311275	16.82443987	19.53874136	4.266728042	52.25969881
349.7935231	401.829481	315.9350246	433.8653064	494.8799171	3.705583839	215.8974187	914.4936486	0.280584858	511.8685155	515.5943761	672.3504589	1.544935571	161.4804005	233.0178377	2.255638701	74.28022689	49.8000327	60.36215264	501.0512772	216.6506506	6.597288893	4.150040948	0.227453757	703.2838196	709.1043944	696.8414913	0.301217585	420.5762197	2537.680731	664.0532919	16.84933908	19.86690366	3.877399282	52.51999235
349.7876159	401.8240113	315.9346686	433.8616411	494.8763825	3.705654627	215.8966574	914.492351	0.280578598	511.8817931	515.6899651	672.0571332	1.548191059	161.1618184	232.8039544	2.255629787	75.08350664	49.36863007	60.37163328	501.084333	216.7182772	6.597463773	4.149902316	0.227649421	703.4989516	709.2468542	696.4088838	0.301166589	423.7269024	2537.978214	663.7883229	16.87027711	20.09427525	3.93866683	52.84154504
349.7817281	401.8185245	315.9344021	433.857999	494.872854	3.705719957	215.8960264	914.4909922	0.280572356	511.869329	515.7328795	671.8115318	1.550383598	160.8955141	232.672332	2.255645834	75.84621361	49.07579576	60.45793957	501.1046473	216.7805853	6.598221114	4.149896848	0.227734966	703.6302083	709.2540398	696.0454272	0.30112227	426.9954426	2536.897905	663.5568516	16.88549764	20.29739987	4.183175388	53.21676607
349.7758598	401.8130208	315.9342245	433.8543799	494.8693317	3.705779859	215.8955251	914.4895725	0.280566133	511.8333599	515.7242104	671.6190499	1.551345885	160.6712886	232.6229773	2.255686841	76.55616546	48.92474558	60.61342886	501.1125834	216.8358957	6.599593378	4.150025768	0.227702798	703.6775546	709.1263793	695.7530787	0.301085734	430.3606153	2534.514566	663.3636041	16.89540552	20.40298647	4.186085254	53.25378429
349.7700107	401.8075003	315.9341354	433.8507836	494.8658156	3.705834362	215.8951529	914.4880922	0.280559928	511.7728998	515.6690727	671.4713314	1.55162697	160.5461083	232.6499241	2.25574725	77.21175274	48.89442688	60.83813998	501.1080648	216.8854155	6.601323578	4.15025646	0.227594208	703.6436321	708.8846543	695.5381804	0.3010565	433.6729991	2530.920167	663.2036708	16.89778823	20.40808382	4.187131078	53.26708887
349.7641809	401.8019629	315.9341344	433.8472101	494.8623056	3.705883492	215.894909	914.4865516	0.280553741	511.6980419	515.5829069	671.3585853	1.551221872	160.4856394	232.7283043	2.255820528	77.82095541	48.94211267	61.10058748	501.0955471	216.9292857	6.60330092	4.150545064	0.227430847	703.5569827	708.5670704	695.3752506	0.301033703	436.9120023	2526.648513	663.0716258	16.89518027	20.40715421	4.18694035	53.26466249
349.7583701	401.7964087	315.9342209	433.8436593	494.8588019	3.70592728	215.8947929	914.484951	0.280547572	511.6319073	515.4994375	671.2554986	1.549816881	160.3849579	232.800382	2.255894913	78.42765343	48.96366538	61.32432679	501.0862696	216.968772	6.605414656	4.150794624	0.227247583	703.4862305	708.2509048	695.1897965	0.301015455	440.1988846	2522.932197	662.9514875	16.89457099	20.40863881	4.187244946	53.26853744
349.7525784	401.7908379	315.9343946	433.840131	494.8553043	3.705965754	215.8948038	914.4832908	0.280541421	511.5798595	515.4292275	671.1574692	1.547725096	160.2465834	232.8517376	2.255963783	79.01706859	48.93862066	61.49369702	501.0822186	217.0037409	6.60747567	4.150977532	0.227071126	703.4454402	707.9682305	694.9796356	0.301001015	443.3876071	2520.071208	662.841592	16.8964721	20.4131566	4.188171862	53.28032932
349.7468055	401.7852505	315.9346549	433.8366251	494.851813	3.705998942	215.8949411	914.4815713	0.280535289	511.5346732	515.3616215	671.0859019	1.545393743	160.1214951	232.9072203	2.256027638	79.5147157	48.93247339	61.63917387	501.0779181	217.0310666	6.609388208	4.151145383	0.226892989	703.4018393	707.7034323	694.8020104	0.300991399	446.1635581	2517.582062	662.7584662	16.89762537	20.41677178	4.18891359	53.2897653
349.7410515	401.7796465	315.9350014	433.8331415	494.8483278	3.706026872	215.8952041	914.4797928	0.280529174	511.502215	515.308675	671.0372503	1.543302046	160.0137442	232.9512442	2.256078145	79.89220742	48.92931915	61.74544454	501.0752908	217.0504919	6.610904873	4.151273009	0.226744784	703.3698638	707.4959825	694.6608948	0.300985415	448.304688	2515.775063	662.7015028	16.89852624	20.42008276	4.189592905	53.29840728
349.7353162	401.7740261	315.9354336	433.8296801	494.8448489	3.706049573	215.8955922	914.4779557	0.280523078	511.4869661	515.2839413	671.0039974	1.542275872	159.9543683	232.9666369	2.256104362	80.11749583	48.90877317	61.80157171	501.0758603	217.0627325	6.611647518	4.151326132	0.226677459	703.3637759	707.3948357	694.5662875	0.300981115	449.5032686	2514.948257	662.6674209	16.89857822	20.42236857	4.190061884	53.30437345
349.7295996	401.7683892	315.9359511	433.8262407	494.8413762	3.706067074	215.8961047	914.4760602	0.280517	511.4880436	515.2869253	670.9882138	1.542457206	159.9513198	232.9557193	2.256105698	80.1788149	48.87980108	61.81215799	501.0788906	217.067554	6.611582925	4.151312339	0.22669275	703.3794514	707.4007092	694.5271893	0.300978305	449.7023702	2515.029832	662.6576198	16.89733921	20.42309449	4.190210822	53.30626819
349.7239015	401.762736	315.9365533	433.8228233	494.8379096	3.706079403	215.896741	914.4741067	0.28051094	511.508018	515.318331	670.9824743	1.543247031	159.9561144	232.9120801	2.256086619	80.12715523	48.81945067	61.7652472	501.0866726	217.066082	6.610945847	4.151224664	0.22676975	703.4278924	707.5010024	694.509647	0.300977113	449.2101681	2516.130552	662.6647431	16.89717006	20.42511381	4.190625126	53.31153881
349.7182218	401.7570665	315.9372399	433.8194276	494.8344493	3.706086589	215.8975004	914.4720955	0.280504898	511.5401902	515.3668399	670.9903754	1.544395141	159.9747766	232.8518713	2.25605416	79.98104498	48.74988976	61.680619	501.0966933	217.0587615	6.60992823	4.151094113	0.226883	703.4915904	707.6602321	694.5181756	0.300978163	448.1888632	2517.871254	662.6889668	16.8971171	20.42727404	4.19106834	53.31717721
349.7125605	401.7513808	315.9380103	433.8160537	494.8309953	3.706088659	215.8983821	914.4700269	0.280498875	511.5683297	515.4044121	671.0280374	1.545438783	160.0352531	232.8180415	2.256023666	79.75356758	48.7393783	61.60833989	501.1019418	217.0451294	6.608913906	4.151001275	0.226973609	703.5231536	707.7971777	694.5804287	0.300983524	446.8745824	2519.323448	662.7377505	16.89413106	20.42588848	4.190784066	53.31356078
349.7069175	401.745679	315.9388641	433.8127014	494.8275474	3.706085643	215.8993857	914.4679012	0.280492869	511.5893058	515.4262261	671.0894309	1.546145372	160.1229669	232.8139211	2.255999955	79.48393408	48.78506036	61.5565442	501.1022249	217.0271992	6.608066888	4.150956637	0.227026779	703.5205609	707.8919288	694.681527	0.300992535	445.4908435	2520.322397	662.8039801	16.88869746	20.42154308	4.189892518	53.30221885
349.7012926	401.7399611	315.9398009	433.8093706	494.8241058	3.70607757	215.9005104	914.4657189	0.280486882	511.6085018	515.4460476	671.1542288	1.5469409	160.2221124	232.814604	2.255976105	79.19975451	48.8422165	61.50926233	501.1012616	217.0086556	6.607206366	4.150920293	0.227079286	703.5111059	707.9836272	694.7952506	0.301001811	444.0457299	2521.221975	662.8722658	16.88256878	20.41635616	4.188828317	53.28868049
349.6956858	401.7342272	315.94082	433.8060611	494.8206704	3.706064467	215.9017555	914.4634801	0.280480913	511.6221121	515.4591963	671.2110665	1.54763051	160.314847	232.8211603	2.25595724	78.95610573	48.9009774	61.47656026	501.0992003	216.9929098	6.606504266	4.150899809	0.227119201	703.4958888	708.0524157	694.89923	0.301009805	442.8214825	2521.846463	662.9307368	16.87646629	20.41119978	4.187770381	53.27522183
349.690097	401.7284773	315.9419212	433.8027728	494.8172412	3.706046363	215.9031204	914.4611852	0.280474962	511.6275775	515.46204	671.2422278	1.547778749	160.360686	232.8295509	2.255950156	78.83820384	48.93520006	61.46253739	501.0975839	216.9845542	6.606225548	4.150894485	0.227128952	703.4839658	708.0752614	694.9513682	0.301014603	442.2560558	2522.099073	662.9619008	16.87230029	20.40838463	4.187192795	53.26787401
349.6845261	401.7227116	315.9431039	433.7995056	494.8138183	3.706023286	215.9046044	914.4588346	0.280469029	511.6254756	515.45668	671.2424978	1.547449246	160.3543477	232.8351474	2.255954159	78.8578671	48.93547494	61.46557698	501.0971455	216.9847191	6.606355966	4.150898166	0.227114067	703.4806031	708.0572751	694.9440055	0.301015346	442.3851066	2522.023187	662.9614097	16.87049377	20.40842313	4.187200695	53.2679745
349.6789729	401.7169301	315.9443677	433.7962595	494.8104016	3.705995266	215.9062069	914.4564285	0.280463114	511.613462	515.4377638	671.2284823	1.546723561	160.3252877	232.852352	2.255969548	78.96509307	48.9371898	61.49531693	501.0951372	216.9900777	6.606853218	4.150934112	0.227066477	703.467173	707.9894542	694.9100923	0.301014089	443.0097415	2521.437991	662.9432177	16.86916404	20.4090385	4.187326951	53.26958068
349.6734375	401.7111328	315.945712	433.7930342	494.8069912	3.70596233	215.9079271	914.4539673	0.280457217	511.5958638	515.4120933	671.2042861	1.54583025	160.2807761	232.8744821	2.255991035	79.12522086	48.93787702	61.54032476	501.0923917	216.9988754	6.607554306	4.150988651	0.2270023	703.4493033	707.8954263	694.859673	0.301011218	443.9268025	2520.557766	662.9128843	16.86828585	20.41020034	4.187565326	53.2726132
349.6679197	401.7053199	315.9471365	433.7898296	494.803587	3.705924508	215.9097646	914.4514513	0.280451338	511.5834762	515.397903	671.1744171	1.545381814	160.234809	232.8810277	2.256005096	79.2663859	48.92155931	61.57132953	501.091563	217.0080146	6.608048459	4.15102105	0.226966691	703.4458011	707.8372137	694.8097572	0.301006844	444.6772804	2519.94583	662.8793555	16.86813869	20.41224707	4.187985254	53.27795536
349.6624193	401.6994913	315.9486407	433.7866458	494.8001891	3.705881827	215.9117185	914.4488808	0.280445478	511.5774924	515.3960143	671.1455771	1.545436641	160.1978796	232.8736693	2.256010053	79.36229117	48.89617916	61.5857625	501.092292	217.0157296	6.608268844	4.151030899	0.226962432	703.4539706	707.8204116	694.7721437	0.301001919	445.133751	2519.65169	662.8493313	16.86820033	20.41454694	4.188457119	53.28395825
349.6569364	401.6936472	315.950224	433.7834824	494.7967974	3.705834316	215.9137882	914.4462562	0.280439635	511.5729311	515.3970906	671.1131426	1.545552401	160.1555216	232.8611248	2.256013694	79.46324041	48.8619651	61.59613806	501.0938643	217.0240322	6.608459733	4.15103314	0.226964331	703.4678578	707.8114174	694.728799	0.300996408	445.5948574	2519.437607	662.8166514	16.86871756	20.41739875	4.189042226	53.29140175
349.6514709	401.6877877	315.9518861	433.7803394	494.793412	3.705782003	215.9159731	914.4435777	0.280433811	511.5708517	515.400984	671.0845143	1.545704836	160.1174672	232.8461798	2.256015078	79.54549273	48.82665916	61.59973486	501.0958951	217.0309853	6.608576616	4.151026943	0.226972187	703.4842913	707.8125985	694.6900763	0.300991579	445.9519903	2519.35428	662.7887141	16.86915325	20.42015247	4.189607206	53.29858922
349.6460225	401.6819127	315.9536264	433.7772168	494.7900329	3.705724918	215.9182725	914.4408458	0.280428005	511.5709696	515.4040075	671.0752442	1.545823439	160.1055635	232.8394729	2.256014253	79.56563335	48.81439231	61.59841265	501.0966699	217.0330113	6.608583689	4.151022642	0.22697857	703.4908176	707.8183799	694.6800034	0.30098991	446.0298905	2519.360654	662.7797122	16.8681127	20.4211196	4.189805633	53.30111354
349.6405913	401.6760224	315.9554445	433.7741143	494.78666	3.705663088	215.9206857	914.4380606	0.280422216	511.5724307	515.4044174	671.0850517	1.54582844	160.1180989	232.8428367	2.256012561	79.5309682	48.82586609	61.59435588	501.0960253	217.0303434	6.608521076	4.151022932	0.226978963	703.4860932	707.8228393	694.6961233	0.300991484	445.8739423	2519.416684	662.7890993	16.86559078	20.42029337	4.189636114	53.29895697
349.6351772	401.6701168	315.95734	433.7710319	494.7832934	3.705596543	215.9232121	914.4352226	0.280416446	511.5781376	515.4093302	671.10654	1.545972517	160.1481393	232.8449003	2.256006048	79.44388943	48.84485475	61.57948533	501.0955193	217.0241902	6.608286803	4.151012549	0.226990805	703.4815765	707.8467623	694.7314531	0.300994816	445.4444529	2519.683458	662.8113089	16.86237374	20.41862521	4.189293858	53.29460293
349.6297799	401.664196	315.9593123	433.7679694	494.7799331	3.70552531	215.925851	914.432332	0.280410694	511.5859348	515.4166198	671.1330855	1.54620046	160.1865635	232.8458269	2.255997113	79.33277171	48.86654193	61.55957442	501.0951816	217.0165301	6.607963786	4.150996398	0.227009149	703.4778078	707.8808593	694.7751119	0.300998873	444.884635	2520.056951	662.8393206	16.85884636	20.41658088	4.188874422	53.28926702
349.6243996	401.6582601	315.961361	433.7649267	494.7765791	3.705449418	215.9286017	914.4293893	0.28040496	511.5899777	515.4193695	671.1490441	1.546266951	160.2092429	232.8480137	2.255992975	79.27266507	48.87988547	61.54988277	501.0949404	217.0121491	6.607797158	4.150988328	0.227016648	703.4747183	707.8963711	694.7983492	0.301001428	444.5850894	2520.256745	662.8562653	16.85594083	20.41528925	4.188609419	53.28589575
349.619036	401.6523091	315.9634857	433.7619037	494.7732314	3.705368895	215.9314637	914.4263946	0.280399244	511.5902538	515.4183839	671.1515073	1.546205521	160.2126151	232.8494766	2.25599347	79.27046352	48.88100816	61.55026055	501.0950497	217.011716	6.607789699	4.150987007	0.227015168	703.474355	707.8947957	694.7976574	0.301001964	444.5724822	2520.284147	662.8593793	16.85389453	20.41503812	4.188557894	53.28524028
349.6136891	401.6463431	315.9656858	433.7589003	494.7698899	3.705283771	215.9344362	914.4233484	0.280393546	511.5893197	515.415366	671.1533338	1.546078633	160.2146355	232.8531451	2.255995467	79.27669425	48.8836175	61.55399613	501.0948888	217.0116747	6.607826168	4.150989925	0.227008932	703.4720601	707.8864316	694.7947667	0.301002466	444.6114598	2520.250607	662.8614405	16.85181167	20.41474265	4.188497273	53.28446907
349.6083587	401.6403622	315.9679609	433.7559163	494.7665547	3.705194073	215.9375186	914.4202509	0.280387866	511.587403	515.4110227	671.1540675	1.545913557	160.2146707	232.8581507	2.255998532	79.29020853	48.88703932	61.56023393	501.0945029	217.0120405	6.607899275	4.150996461	0.226999276	703.4683788	707.8731194	694.7901896	0.301002817	444.6947943	2520.16346	662.8619358	16.84975666	20.41448085	4.188443559	53.28378575
349.6030449	401.6343664	315.9703106	433.7529517	494.7632259	3.705099831	215.9407101	914.4171024	0.280382204	511.5863441	515.409372	671.1522077	1.54585811	160.211998	232.8593302	2.25600004	79.30264329	48.88624212	61.56369416	501.0944644	217.0127569	6.607940926	4.150999558	0.22699551	703.4677705	707.8671012	694.7853109	0.301002578	444.7603653	2520.111942	662.8599889	16.84798175	20.4145584	4.18845947	53.28398816
349.5977474	401.6283558	315.9727343	433.7500064	494.7599033	3.705001072	215.9440102	914.4139034	0.28037656	511.5866303	515.4107788	671.1500148	1.545924509	160.2097485	232.8571142	2.255999391	79.30506055	48.88353298	61.56303772	501.0946735	217.0131871	6.607929732	4.150998572	0.226998524	703.4695028	707.8704105	694.7840051	0.301002098	444.7653003	2520.118023	662.8578554	16.84633422	20.41479033	4.188507054	53.28459351
349.5924662	401.6223304	315.9752317	433.7470801	494.7565871	3.704897825	215.9474183	914.4106541	0.280370934	511.5856852	515.4114998	671.1425446	1.545976738	160.2000179	232.8539298	2.255999947	79.32653148	48.87626223	61.56522594	501.0949796	217.0150346	6.607969826	4.150999895	0.22699954	703.4724327	707.8692835	694.775308	0.301000763	444.8644852	2520.062926	662.8501271	16.84504877	20.41546112	4.18864468	53.28634433
349.5872013	401.6162904	315.9778022	433.7441729	494.7532771	3.704790118	215.9509335	914.4073548	0.280365326	511.5840227	515.4116554	671.132289	1.546009689	160.1861818	232.8504032	2.256001268	79.35875686	48.8664616	61.5689834	501.0953364	217.0176453	6.608040411	4.151002316	0.226999096	703.4759862	707.8652832	694.7623403	0.300999005	445.0171522	2519.975349	662.8394647	16.84395383	20.41636299	4.188829717	53.2886983
349.5819524	401.6102358	315.9804453	433.7412845	494.7499735	3.704677981	215.9545553	914.4040059	0.280359737	511.5833759	515.4118115	671.1283403	1.54602473	160.180615	232.8489863	2.256001647	79.37016756	48.86279516	61.56997926	501.0954257	217.0185998	6.608067937	4.151003122	0.226999033	703.4772851	707.8640521	694.7580589	0.30099833	445.0720571	2519.941866	662.8352294	16.84241402	20.41672576	4.188904148	53.28964518
349.5767196	401.6041667	315.9831607	433.7384149	494.7466762	3.704561441	215.958283	914.4006076	0.280354165	511.5834284	515.4114138	671.1302885	1.546001008	160.18263	232.8501337	2.256001549	79.3641632	48.8651371	61.56917294	501.0952254	217.018075	6.608065112	4.151003162	0.226998098	703.4760842	707.863694	694.7611366	0.300998701	445.0475685	2519.948196	662.8369827	16.84043941	20.41656149	4.188870443	53.28921641
349.5715027	401.5980831	315.9859478	433.7355639	494.7433852	3.704440528	215.962116	914.3971604	0.280348611	511.5841191	515.4117116	671.1340158	1.545998001	160.1872035	232.8510872	2.2560007	79.34999941	48.86866784	61.5666221	501.0950319	217.017007	6.60803684	4.151001596	0.226998864	703.4748763	707.8663065	694.7672995	0.300999342	444.981036	2519.986116	662.8406483	16.83836353	20.41627438	4.188811539	53.28846704
349.5663016	401.591985	315.9888062	433.7327314	494.7401005	3.704315269	215.9660535	914.3936645	0.280343075	511.5852856	515.4126387	671.1386933	1.546017694	160.1933529	232.8516487	2.25599929	79.33081398	48.87267243	61.56295272	501.0948829	217.0156364	6.607989395	4.150998883	0.227001159	703.4738901	707.8712914	694.7752201	0.301000106	444.8872981	2520.046112	662.8454018	16.83623699	20.41592579	4.188740018	53.28755719
349.5611162	401.5858727	315.9917353	433.7299173	494.7368221	3.704185693	215.970095	914.3901202	0.280337557	511.5856891	515.412863	671.1405247	1.546020537	160.1957857	232.8520025	2.255998844	79.32389621	48.87427081	61.56175797	501.0948268	217.0151261	6.607972623	4.150997974	0.2270018	703.4734485	707.872845	694.7780257	0.301000412	444.8536166	2520.067605	662.8472878	16.83427861	20.41578105	4.188710321	53.28717939
349.5559465	401.5797461	315.9947349	433.7271215	494.7335501	3.704051828	215.9742397	914.3865279	0.280332058	511.585297	515.4125681	671.1387687	1.546015676	160.1935813	232.8517007	2.255999341	79.33104931	48.87263306	61.56310752	501.094911	217.0156485	6.607988261	4.150998795	0.227001149	703.4739572	707.8712082	694.7749148	0.301000122	444.8876194	2520.048021	662.8455645	16.83254691	20.41591123	4.18873703	53.28751917
349.5507923	401.5736053	315.9978043	433.7243439	494.7302844	3.703913704	215.978487	914.382888	0.280326576	511.5850608	515.4121757	671.1380923	1.546004915	160.1929215	232.8518446	2.255999784	79.33536484	48.87202464	61.5643148	501.0949717	217.0159215	6.607997171	4.150999502	0.227000399	703.4740747	707.8697255	694.7728417	0.301000019	444.9080831	2520.036381	662.8450093	16.83072997	20.41593803	4.188742528	53.28758911
349.5456536	401.5674503	316.0009431	433.7215844	494.7270251	3.703771348	215.9828363	914.3792006	0.280321112	511.5849407	515.4116746	671.1384139	1.545987111	160.1935698	232.8524398	2.256000168	79.33689038	48.87243932	61.5652939	501.0949868	217.0159496	6.608001172	4.151000142	0.226999459	703.4737559	707.8683154	694.7719295	0.301000091	444.9158856	2520.030925	662.8454777	16.82883769	20.41587343	4.188729276	53.28742053
349.5405302	401.5612813	316.0041509	433.7188427	494.7237721	3.703624789	215.9872869	914.3754661	0.280315666	511.5849075	515.4115297	671.1384507	1.545982501	160.1937515	232.8525919	2.256000309	79.33772087	48.87249234	61.56571352	501.0950047	217.0159817	6.608002451	4.15100041	0.226999181	703.4736914	707.867841	694.7714451	0.301000099	444.9198175	2520.028597	662.8455831	16.82698437	20.4158561	4.188725719	53.28737527
349.5354222	401.5550983	316.0074271	433.7161189	494.7205255	3.703474056	215.991838	914.371685	0.280310238	511.5850966	515.4118026	671.1388799	1.545991273	160.194346	232.8524611	2.256000058	79.33535113	48.87280816	61.56515683	501.0949985	217.015829	6.607995408	4.151000028	0.226999737	703.4736823	707.8687968	694.7724361	0.301000156	444.9079021	2520.036526	662.8460113	16.82512549	20.41583201	4.188720777	53.2873124
349.5303292	401.5489014	316.0107714	433.7134128	494.7172852	3.703319177	215.9964892	914.3678574	0.280304828	511.5851065	515.4119921	671.1385034	1.545999141	160.1938261	232.8521637	2.255999979	79.33584029	48.87243416	61.56503838	501.0950089	217.0158922	6.607995764	4.151000015	0.227000034	703.473861	707.8691293	694.772318	0.30100008	444.910049	2520.035188	662.8455878	16.82332144	20.41587446	4.188729487	53.28742321
349.5252514	401.5426906	316.0141832	433.7107242	494.7140512	3.70316018	216.0012396	914.3639837	0.280299436	511.5849397	515.412081	671.1373463	1.546005558	160.1922481	232.8517145	2.256000082	79.33919803	48.87136884	61.56537919	501.0950411	217.0161713	6.608003223	4.15100034	0.227000071	703.4742406	707.868827	694.7710433	0.300999875	444.9261312	2520.02514	662.8443559	16.82156917	20.41597976	4.188751091	53.28769805
349.5201886	401.536466	316.0176621	433.7080532	494.7108236	3.702997095	216.0060886	914.3600642	0.280294062	511.5848976	515.4121131	671.1370545	1.546007376	160.1918236	232.851592	2.256000092	79.33992778	48.87110172	61.56540654	501.0950451	217.0162365	6.608005035	4.151000413	0.2270001	703.4743382	707.868795	694.7707945	0.300999825	444.9296719	2520.022866	662.8440338	16.81975354	20.41600817	4.188756921	53.28777221
349.5151406	401.5302276	316.0212076	433.7053994	494.7076024	3.702829949	216.0110357	914.3560993	0.280288706	511.5849214	515.4120129	671.1374532	1.546002456	160.1923352	232.8518153	2.256000096	79.33893912	48.87149309	61.56533909	501.0950277	217.0161475	6.608003516	4.151000378	0.226999958	703.4741731	707.868724	694.7711785	0.300999901	444.925147	2520.025466	662.8444526	16.81788305	20.41597	4.188749089	53.28767257
349.5101074	401.5239756	316.0248193	433.7027629	494.7043875	3.702658771	216.01608	914.3520893	0.280283368	511.5849664	515.4119622	671.1378901	1.545998983	160.1928588	232.8520021	2.256000045	79.33751833	48.87190979	61.56511429	501.0950038	217.0160353	6.608001174	4.151000216	0.226999917	703.4740167	707.8688373	694.7717798	0.300999983	444.9185434	2520.029367	662.8448913	16.81601361	20.4159331	4.188741518	53.28757626
[truncated: 20,915 more rows]
